# Supplementary material for: Bsi(OTf)3-mediated tandem annulation of 1-aryl isochroman-3-ones with oxygenated arenes: one-pot synthesis of polyoxygenated homotriptycenes
Source: Royal Society of Chemistry journal article supplement (doi:10.1039/d1ob00606a), 2021-01-01
Supplement: d1ob00606a1.pdf [file d1ob00606a1.pdf]

# Supporting Information

## Bi(OTf)<sub>3</sub>-Mediated Tandem Annulation of 1-Aryl Isochroman-3-ones with Oxygenated Arenes. One-Pot Synthesis of Polyoxygenated Homotriptycenes

Meng-Yang Chang,<sup>\*a,b</sup> Chun-Yi Lin,<sup>a</sup> Shin-Mei Chen<sup>a</sup> and Yu-Ting Hsiao<sup>a</sup>

<sup>a</sup>Department of Medicinal and Applied Chemistry, Kaohsiung Medical University, Kaohsiung 807, Taiwan <sup>b</sup>Department of Medical Research, Kaohsiung Medical University Hospital, Kaohsiung 807, Taiwan

\*Corresponding author, email: [mychang@kmu.edu.tw](mailto:mychang@kmu.edu.tw)

### Table of Contents

|                                                                                            |           |
|--------------------------------------------------------------------------------------------|-----------|
| 1. <sup>1</sup> H NMR and <sup>13</sup> C NMR spectra copies of compound <b>4a</b>         | S-2~S-3   |
| 2. <sup>1</sup> H NMR and <sup>13</sup> C NMR spectra copies of compounds <b>5a~5r</b>     | S-4~S-39  |
| 3. <sup>1</sup> H NMR and <sup>13</sup> C NMR spectra copies of compounds <b>5r-1~5w-1</b> | S-40~S-51 |
| 4. <sup>1</sup> H NMR and <sup>13</sup> C NMR spectra copies of compounds <b>5w-2</b>      | S-52~S-53 |
| 5. <sup>1</sup> H NMR and <sup>13</sup> C NMR spectra copies of compounds <b>5x~5z</b>     | S-54~S-59 |
| 6. X-ray crystal data of compounds <b>5a</b> and <b>5w-2</b>                               | S-60~S-63 |

# Compound 4a (<sup>1</sup>H-NMR spectral data)

SHBF3

Pulse Sequence: s2pul  
UNITYplus-400 "unity400"  
Date: Nov 15 2018  
Solvent: CDC13  
Ambient temperature  
Total 32 repetitions

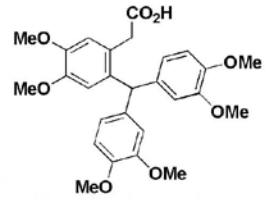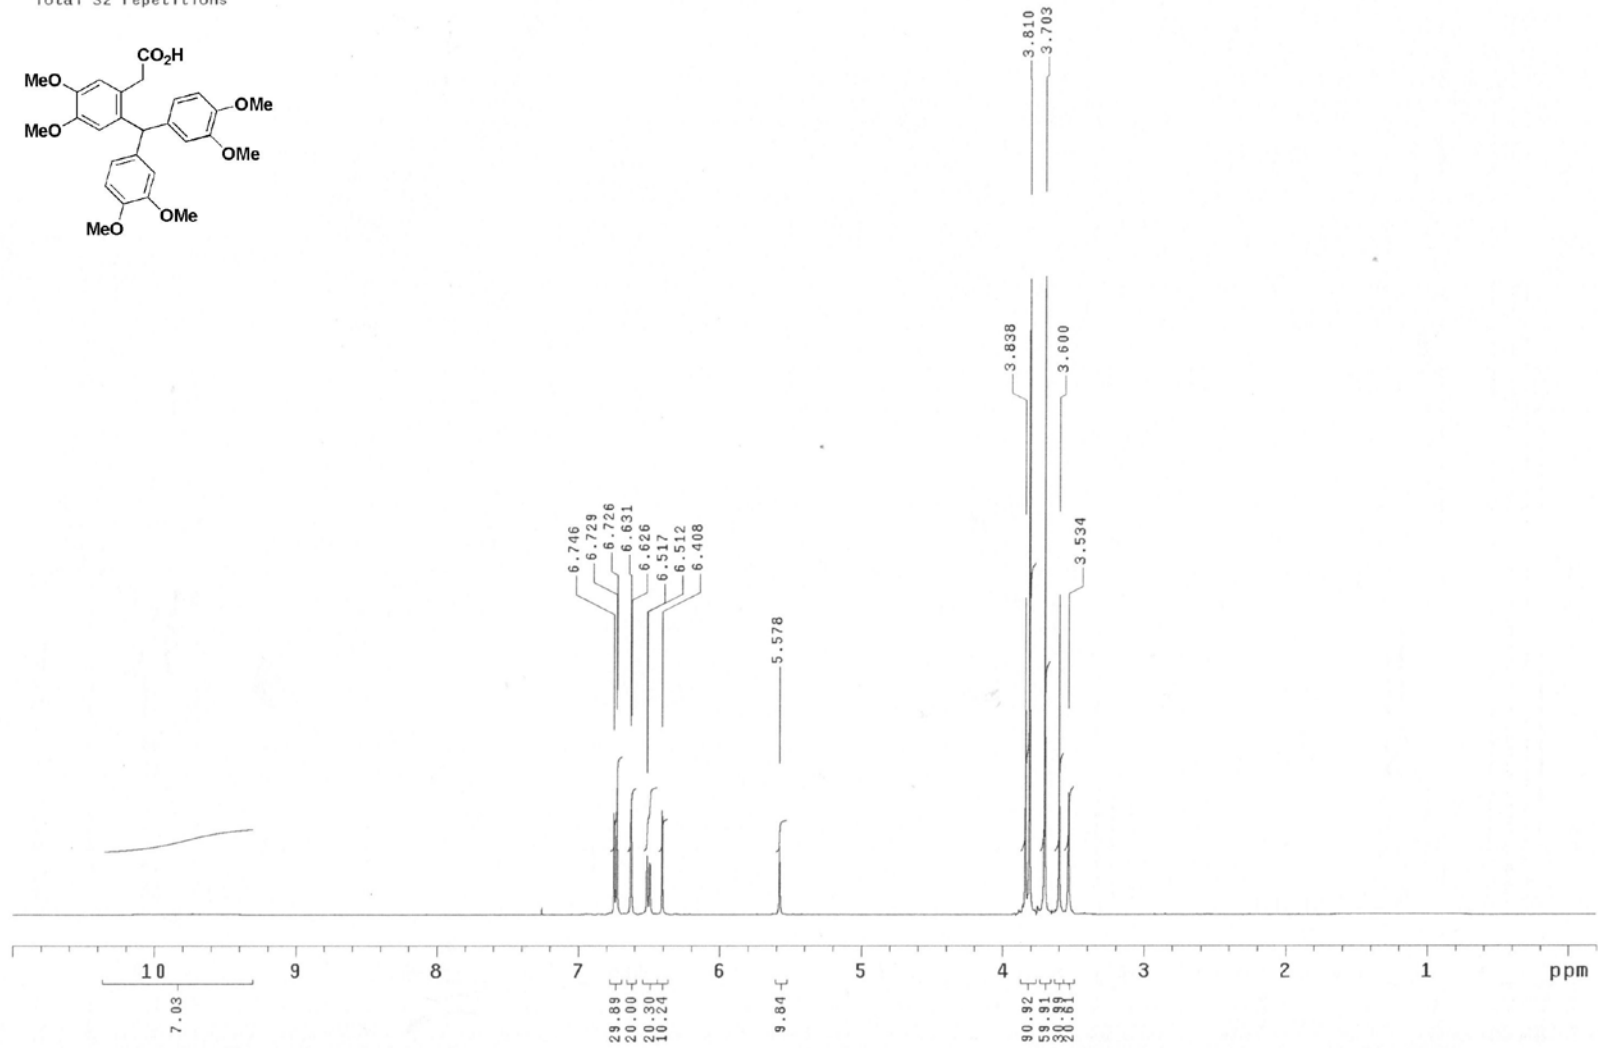

# Compound 4a (<sup>13</sup>C-NMR spectral data)

SHBF3

Pulse Sequence: s2pu1  
UNITYplus-400 "unity400"  
Date: Nov 15 2018  
Solvent: CDCl3  
Ambient temperature  
Total 480 repetitions

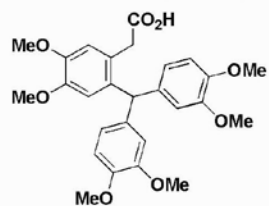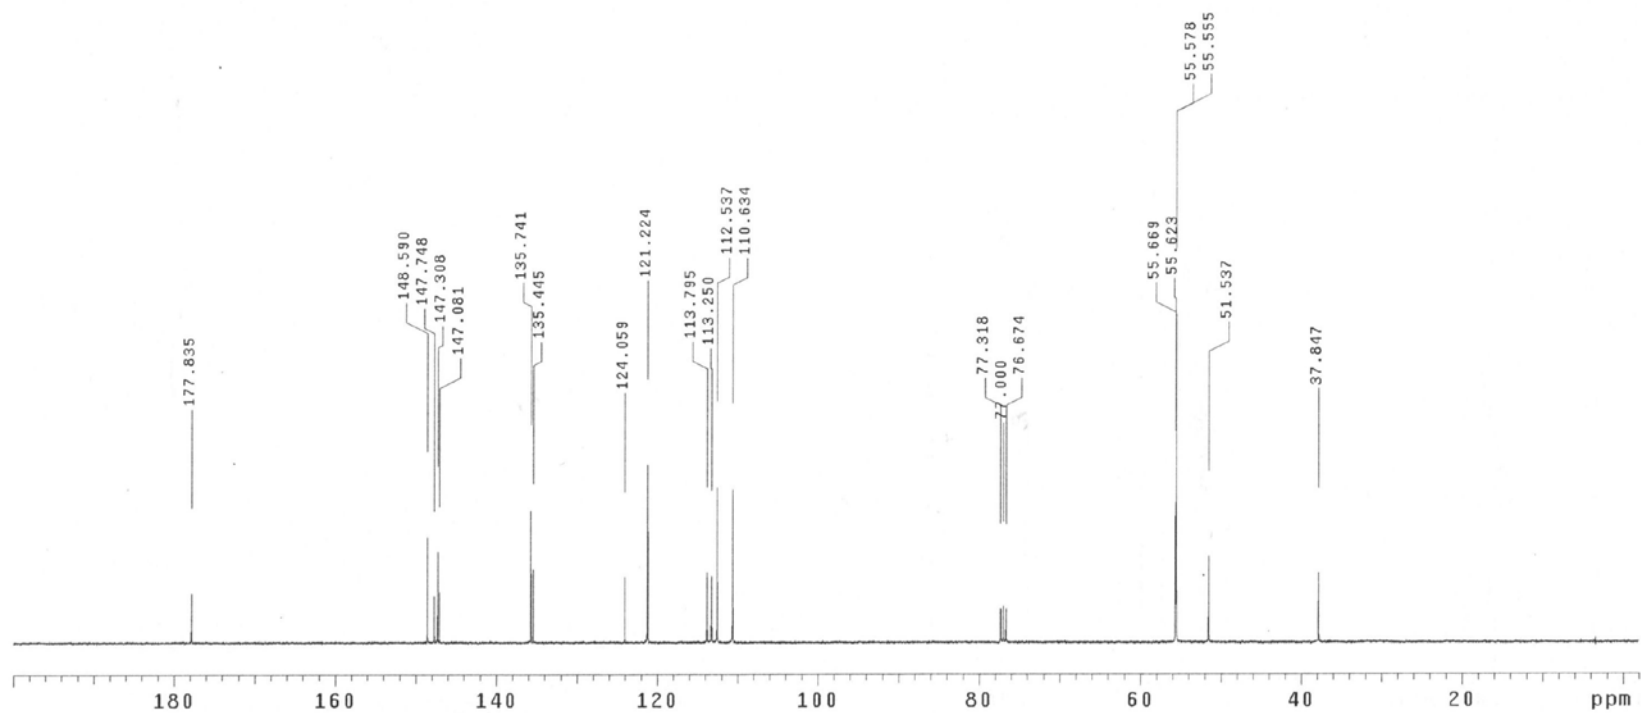

# Compound 5a (<sup>1</sup>H-NMR spectral data)

SH6760Me6

Pulse Sequence: s2pu1  
UNITYplus-400 "unity400"  
Date: Nov 21 2018  
Solvent: CDCl<sub>3</sub>  
Ambient temperature  
Total 32 repetitions

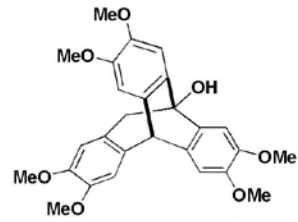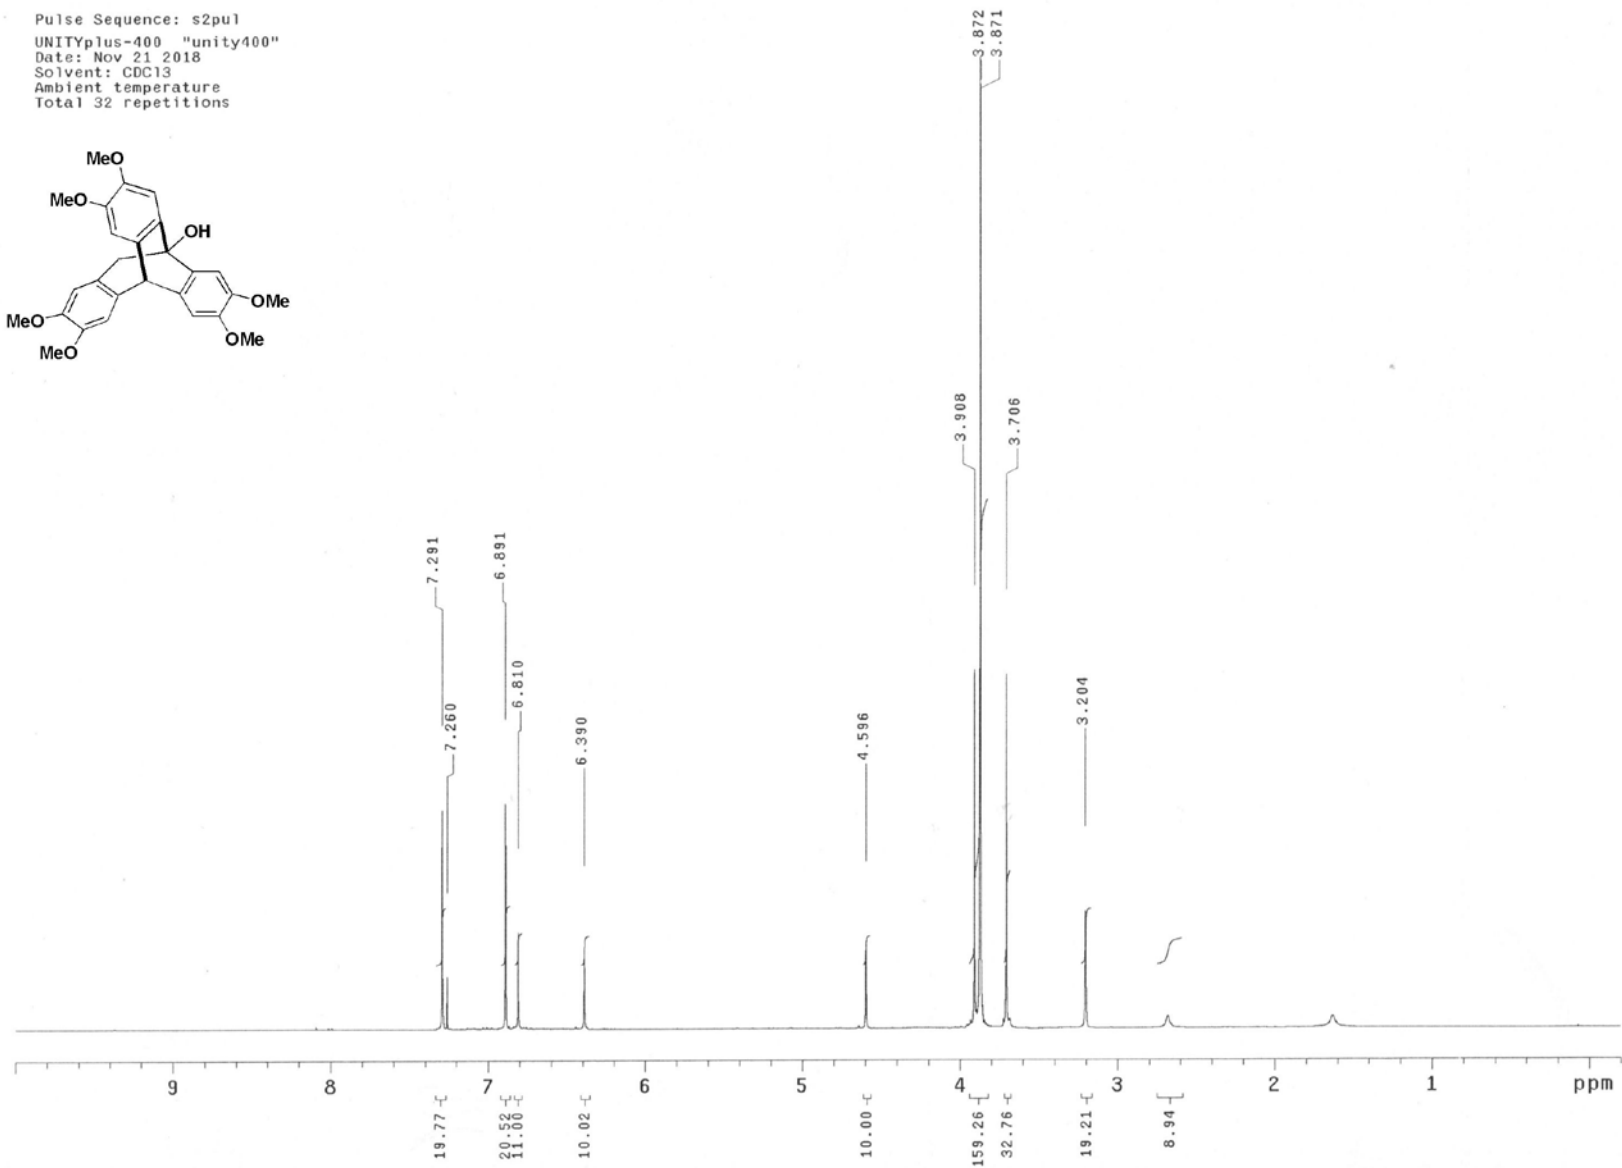

# Compound 5a (<sup>13</sup>C-NMR spectral data)

SH6760Me6

Pulse Sequence: s2pu1  
UNITYplus-400 "unity400"  
Date: Nov 21 2018  
Solvent: CDCl<sub>3</sub>  
Ambient temperature  
Total 1056 repetitions

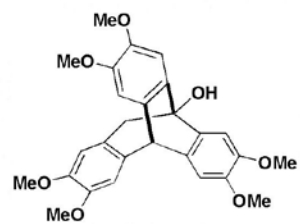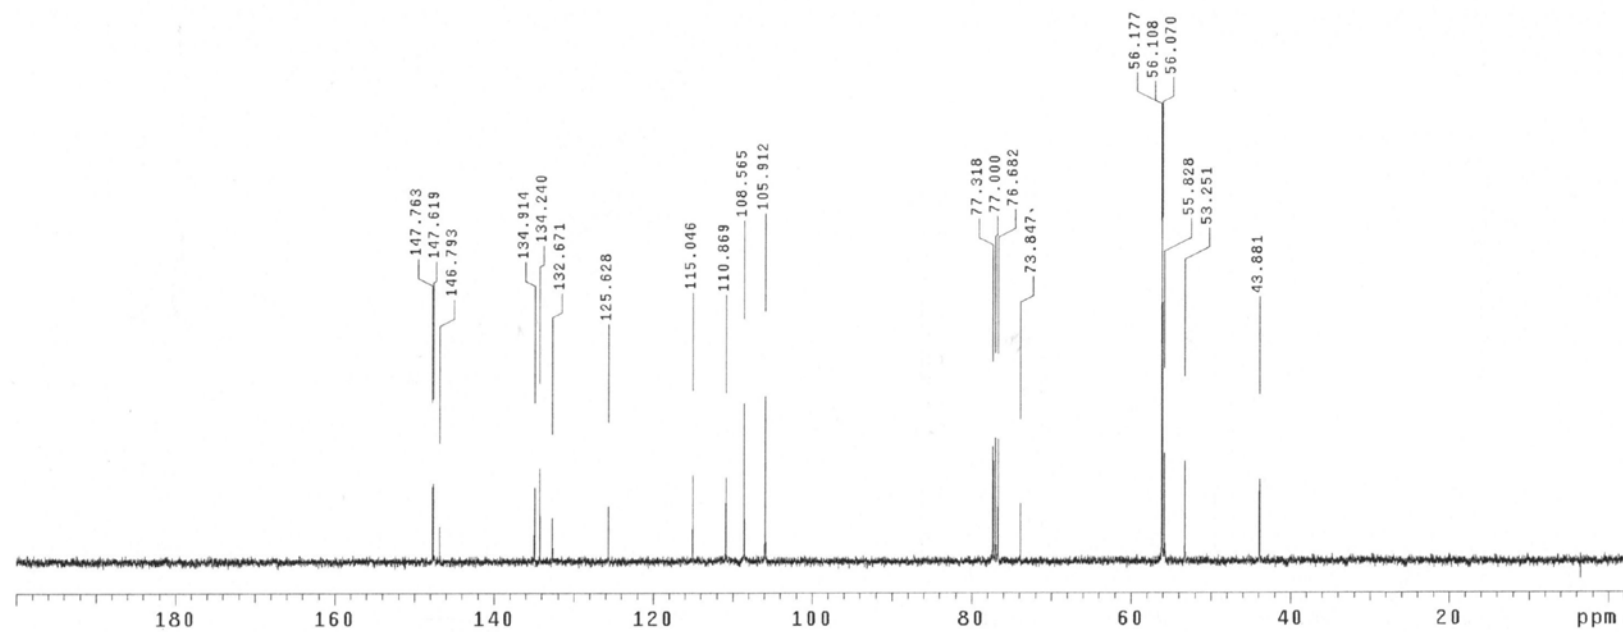

# Compound 5b (<sup>1</sup>H-NMR spectral data)

SH[3.2.2]5b

Pulse Sequence: s2pu1  
UNITYplus-400 "unity400"  
Date: Dec 13 2018  
Solvent: CDCl<sub>3</sub>  
Ambient temperature  
Total 32 repetitions

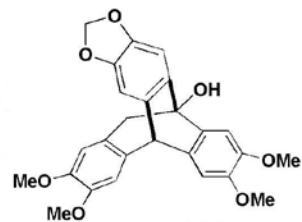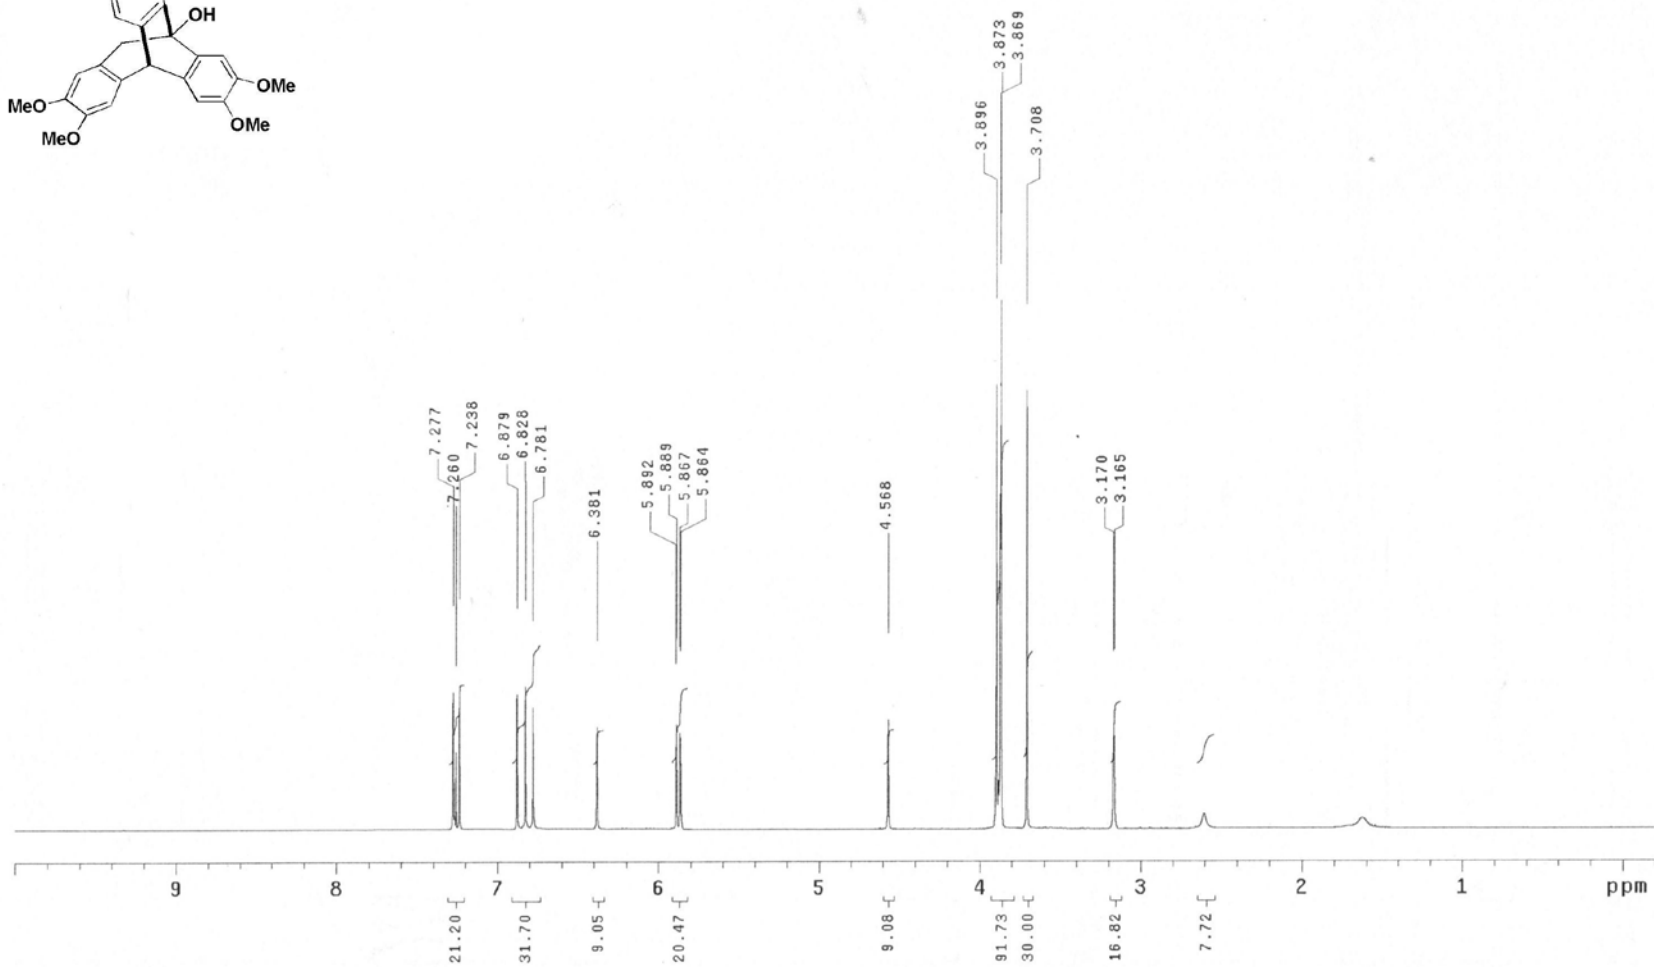

# Compound 5b (<sup>13</sup>C-NMR spectral data)

SH[3.2.2]5b

Pulse Sequence: s2pu1  
UNITYplus-400 "unity400"  
Date: Dec 13 2018  
Solvent: CDC13  
Ambient temperature  
Total 1648 repetitions

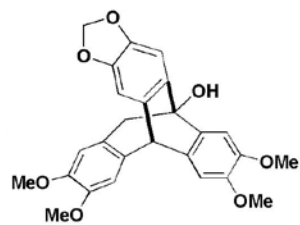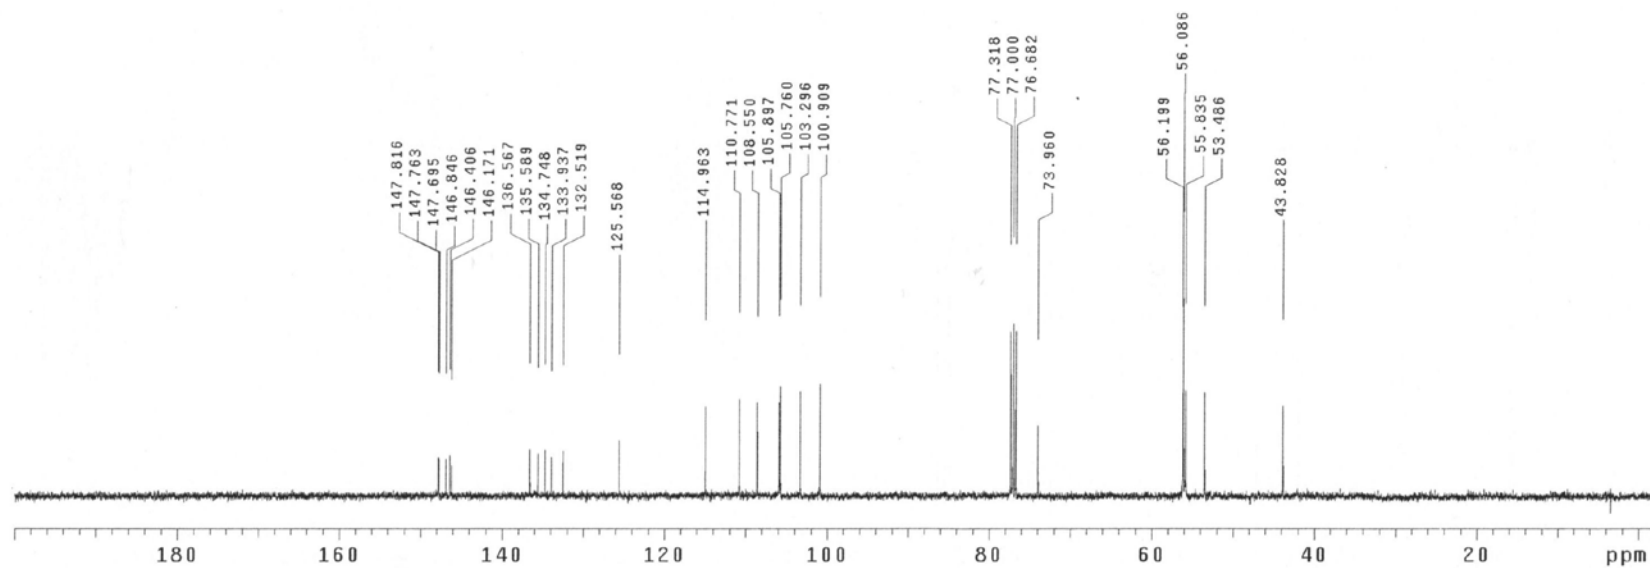

# Compound 5c (<sup>1</sup>H-NMR spectral data)

SH[3.2.2]5C

Pulse Sequence: s2pu1

UNITYplus-400 "unity400"

Date: Dec 7 2018

Solvent: CDC13

Ambient temperature

Total 32 repetitions

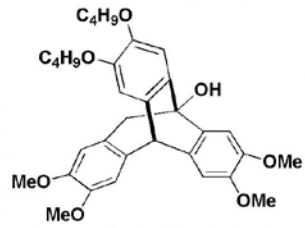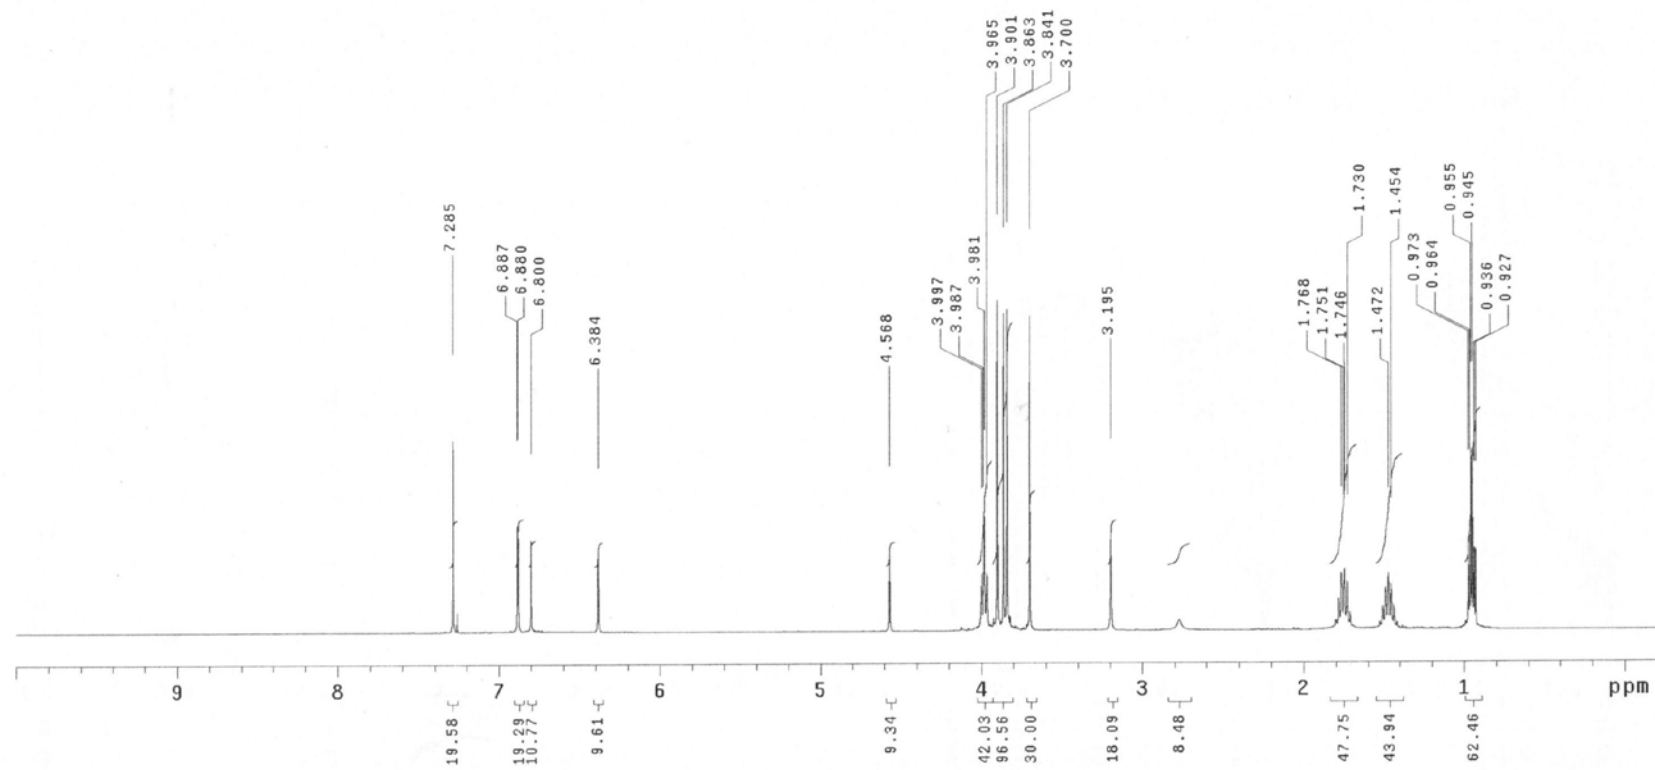



# Compound 5c (<sup>13</sup>C-NMR spectral data)

SH[3.2.2]5C

Pulse Sequence: s2pu1

UNITYplus-400 "unity400"

Date: Dec 7 2018

Solvent: CDCl<sub>3</sub>

Ambient temperature

Total 832 repetitions

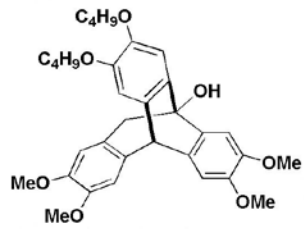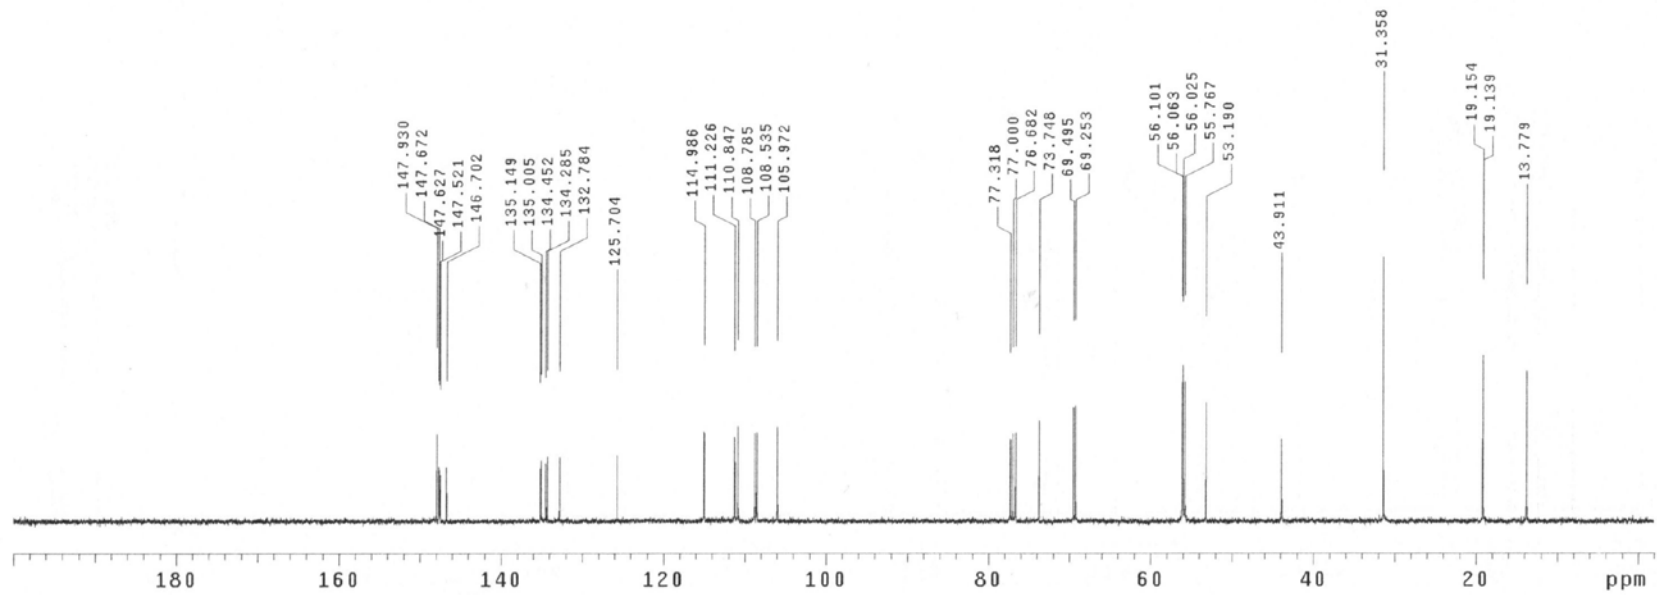

# Compound 5d (<sup>1</sup>H-NMR spectral data)

SH[3.2.2]5d

Pulse Sequence: s2pu1  
UNITYplus-400 "unity400"  
Date: Jan 9 2019  
Solvent: CDC13  
Ambient temperature  
Total 64 repetitions

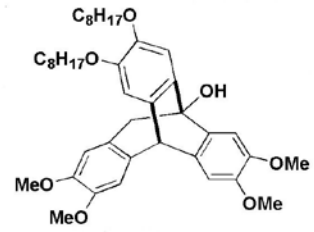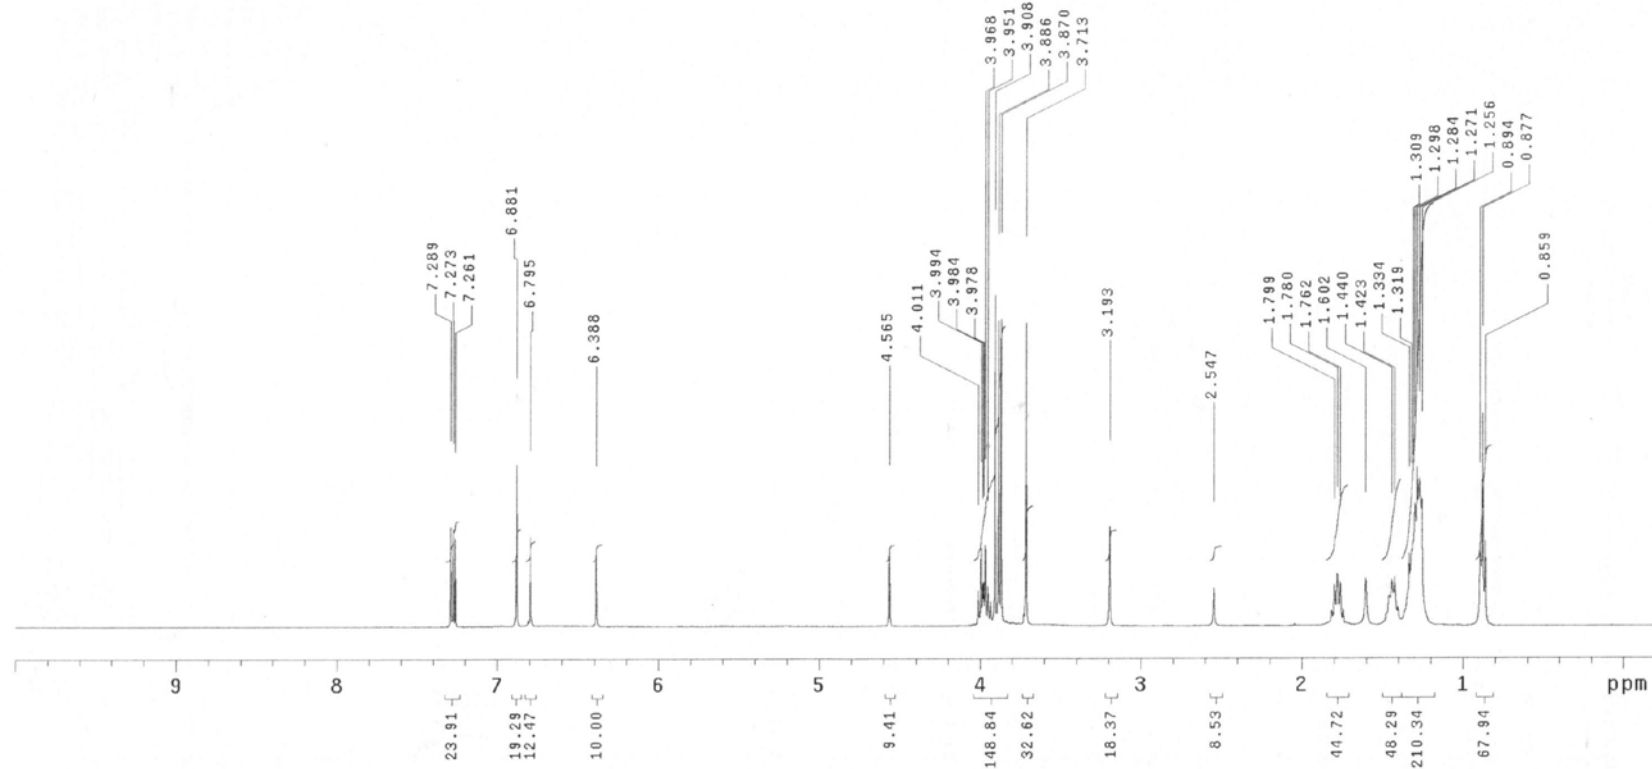

# Compound 5d (<sup>13</sup>C-NMR spectral data)

SH[3.2.2]5d

Pulse Sequence: s2pu1

UNITYplus-400 "unity400"

Date: Jan 9 2019

Solvent: CDCl<sub>3</sub>

Ambient temperature

Total 2480 repetitions

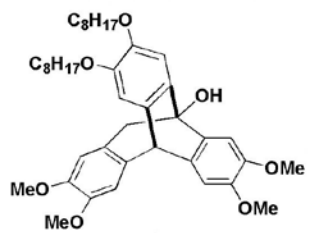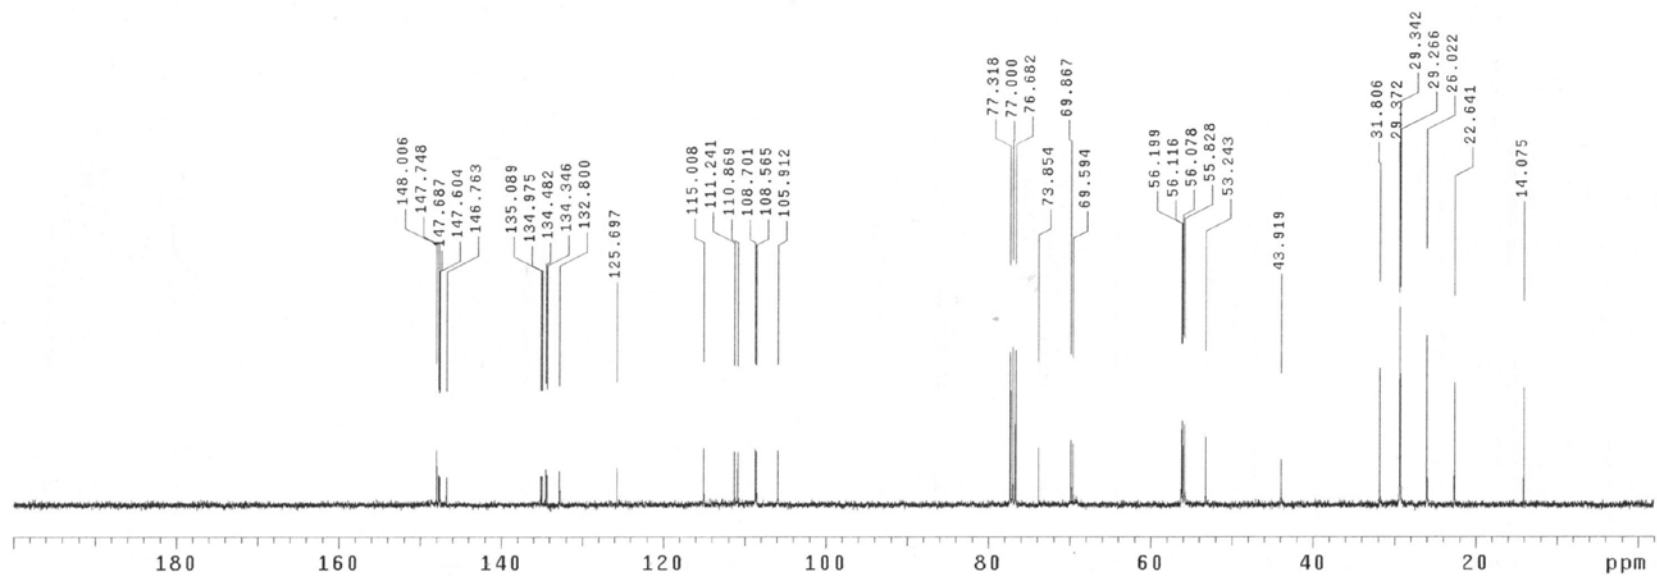

# Compound 5e (<sup>1</sup>H-NMR spectral data)

SH[3.2.2]5e

Pulse Sequence: s2pu1

UNITYplus-400 "unity400"

Date: Apr 30 2019

Solvent: CDC13

Ambient temperature

Total 32 repetitions

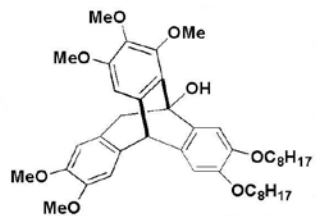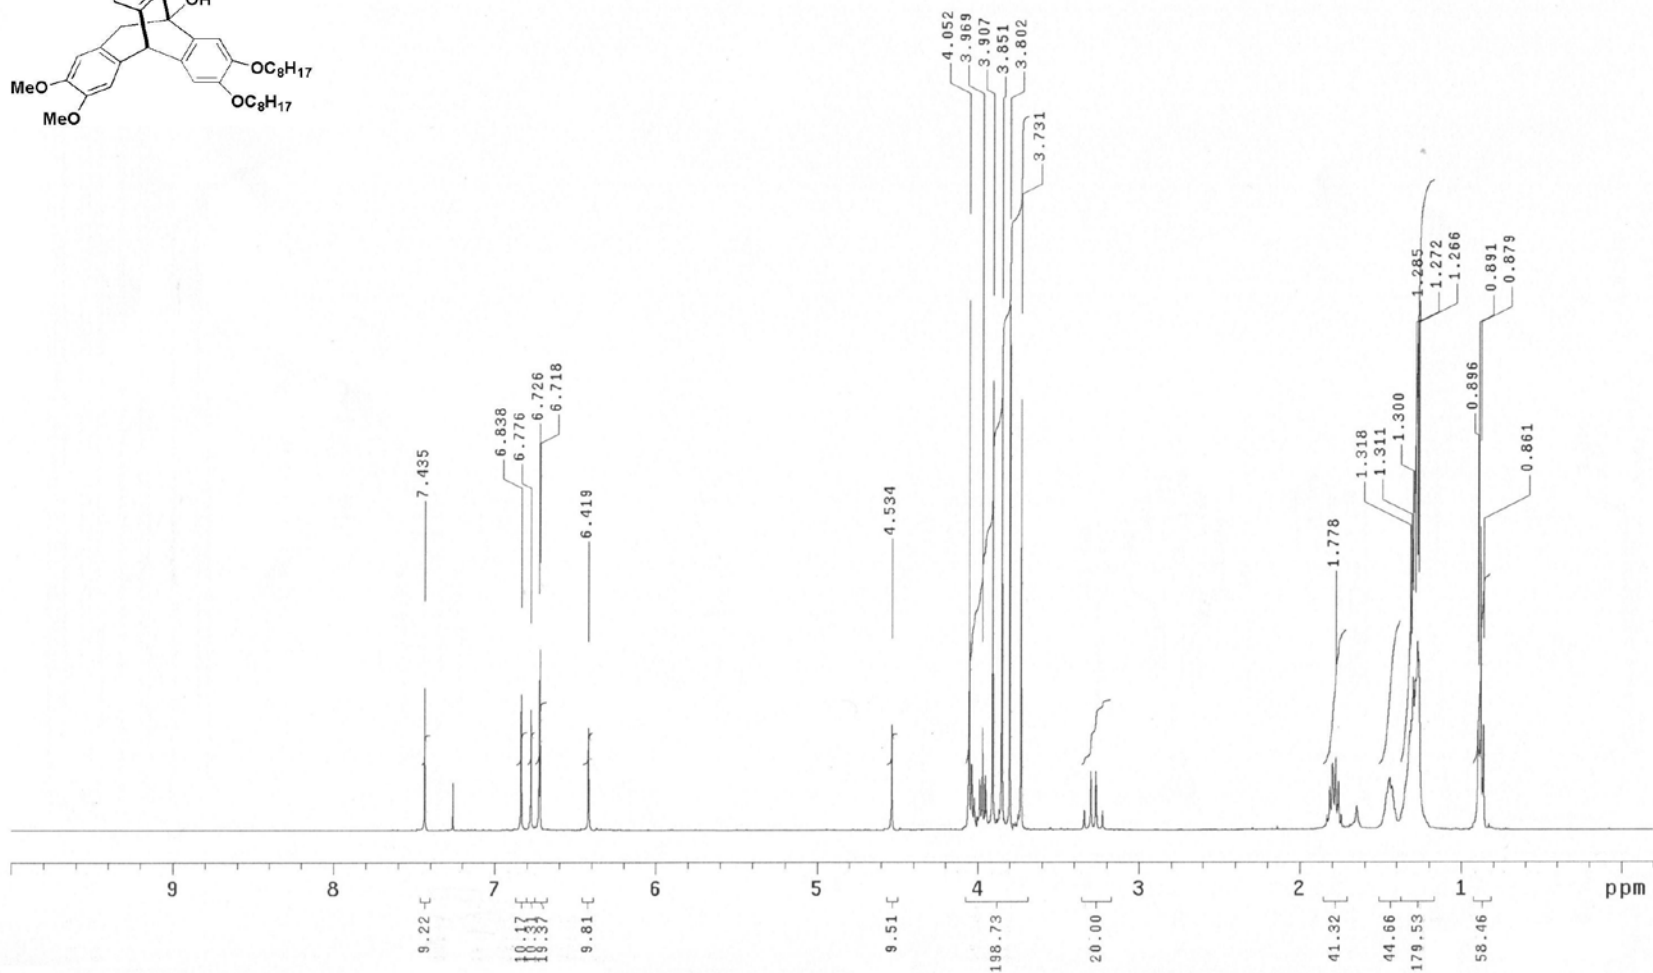

# Compound 5e (<sup>13</sup>C-NMR spectral data)

SH[3.2.2]5e

Pulse Sequence: s2pu1

UNITYplus-400 "unity400"

Date: Apr 30 2019

Solvent: CDCl<sub>3</sub>

Ambient temperature

Total 1040 repetitions

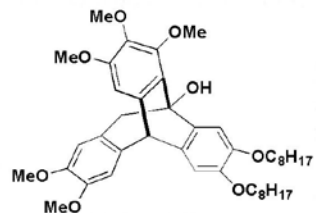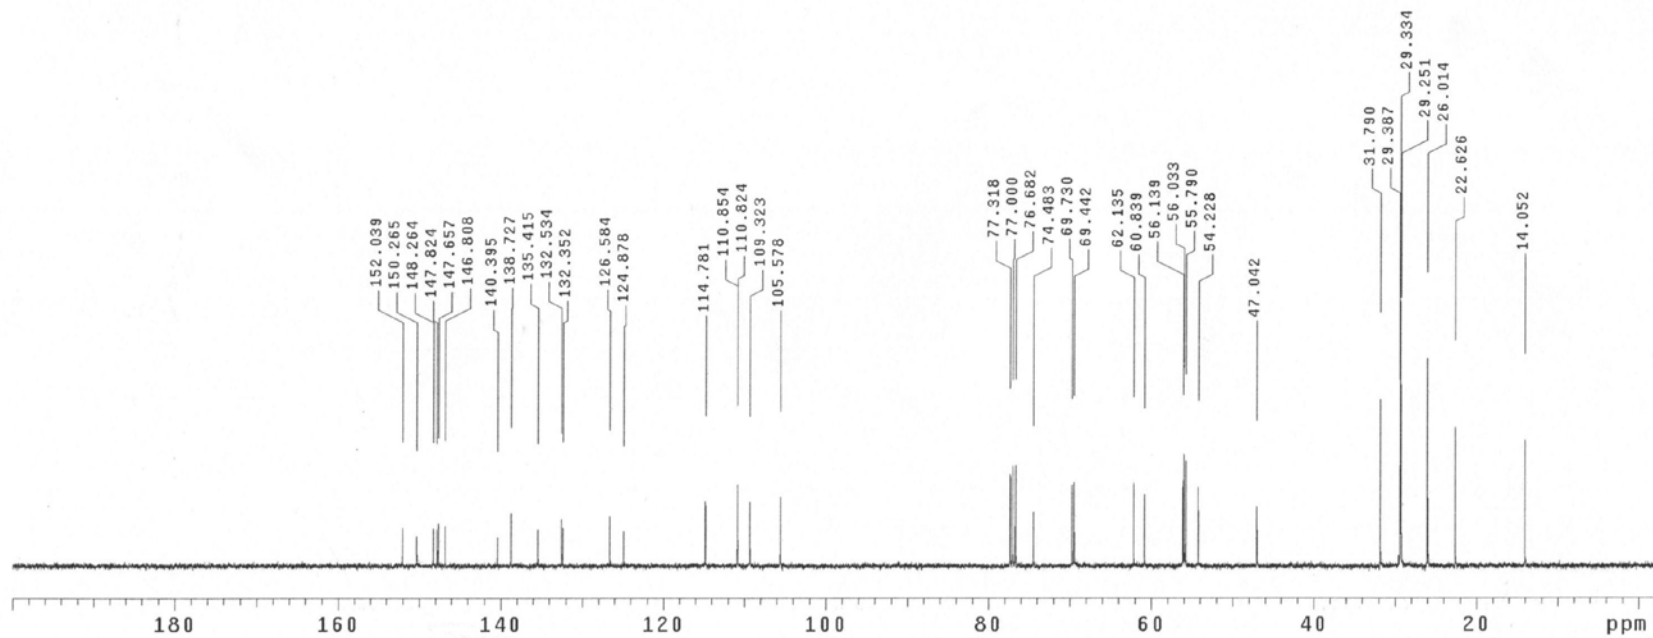

# Compound 5f (<sup>1</sup>H-NMR spectral data)

SH[3.2.2]5f

Pulse Sequence: s2pu1

UNITYplus-400 "unity400"

Date: May 7 2019

Solvent: CDCl<sub>3</sub>

Ambient temperature

Total 32 repetitions

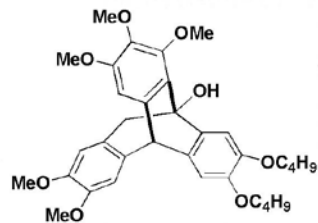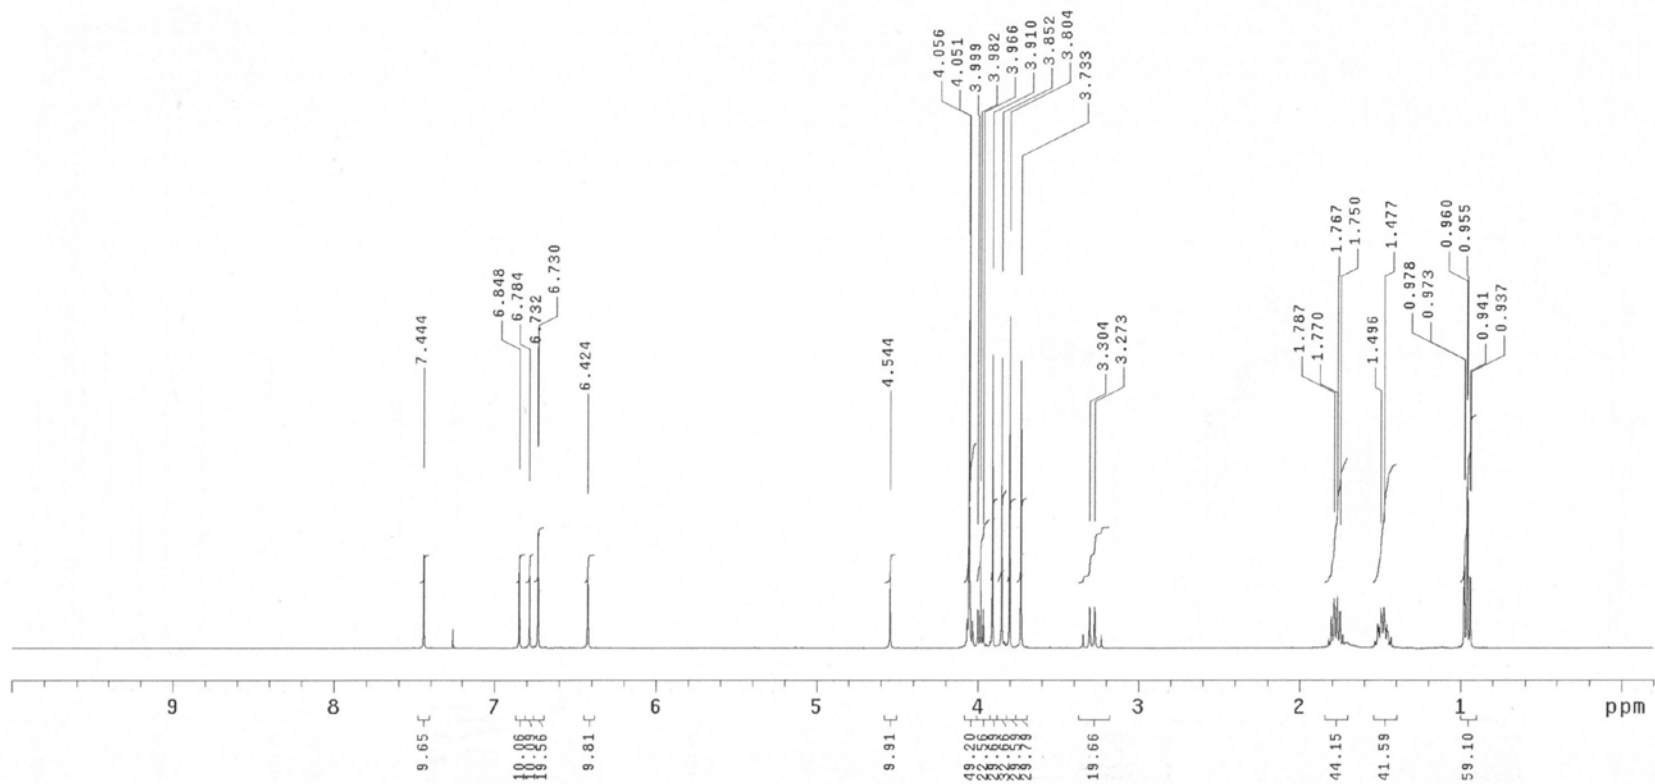

# Compound 5f (<sup>13</sup>C-NMR spectral data)

SH[3.2.2]5f

Pulse Sequence: s2pu1

UNITYplus-400 "unity400"

Date: May 7 2019

Solvent: CDC13

Ambient temperature

Total 848 repetitions

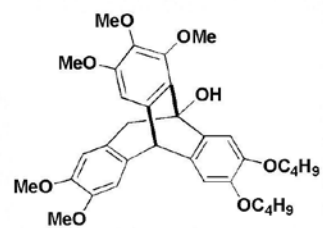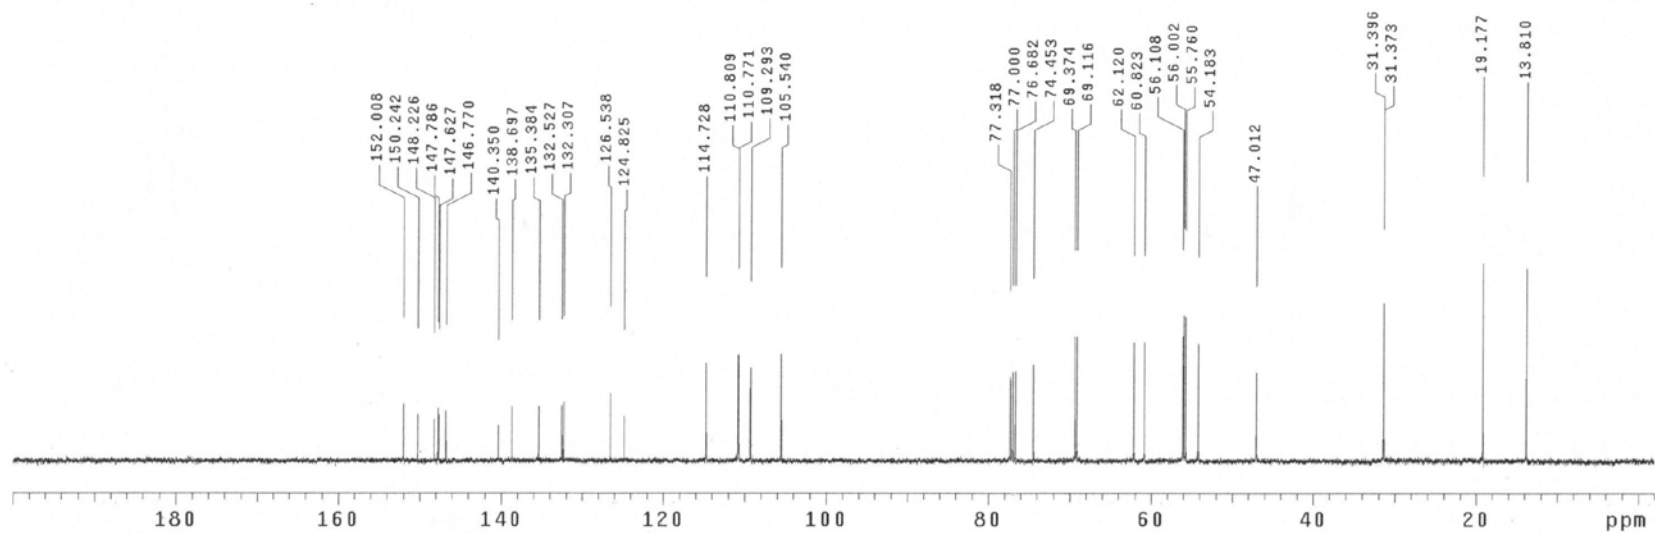

# Compound 5g (<sup>1</sup>H-NMR spectral data)

SH[3.2.2]5g

Pulse Sequence: s2pu1  
UNITYplus-400 "unity400"  
Date: Jan 3 2019  
Solvent: CDCl<sub>3</sub>  
Ambient temperature  
Total 64 repetitions

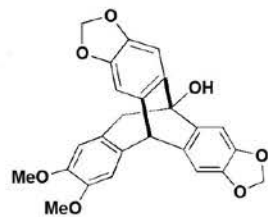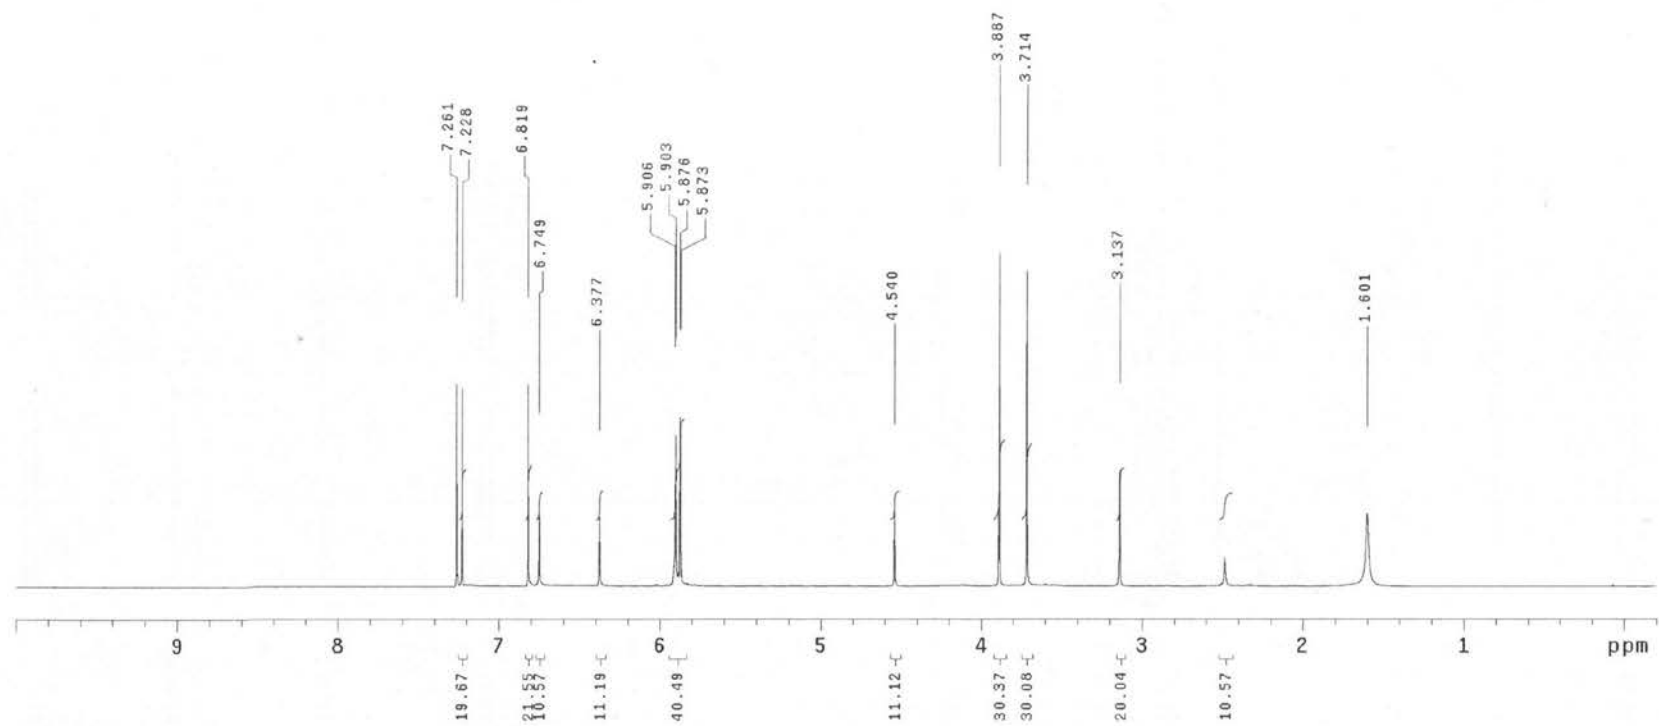



# Compound 5g (<sup>13</sup>C-NMR spectral data)

SH[3.2.2]5g

Pulse Sequence: s2pu1  
UNITYplus-400 "unity400"  
Date: Jan 3 2019  
Solvent: CDCl<sub>3</sub>  
Ambient temperature  
Total 32816 repetitions

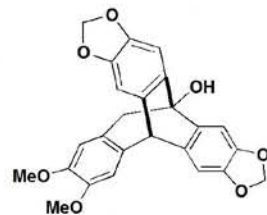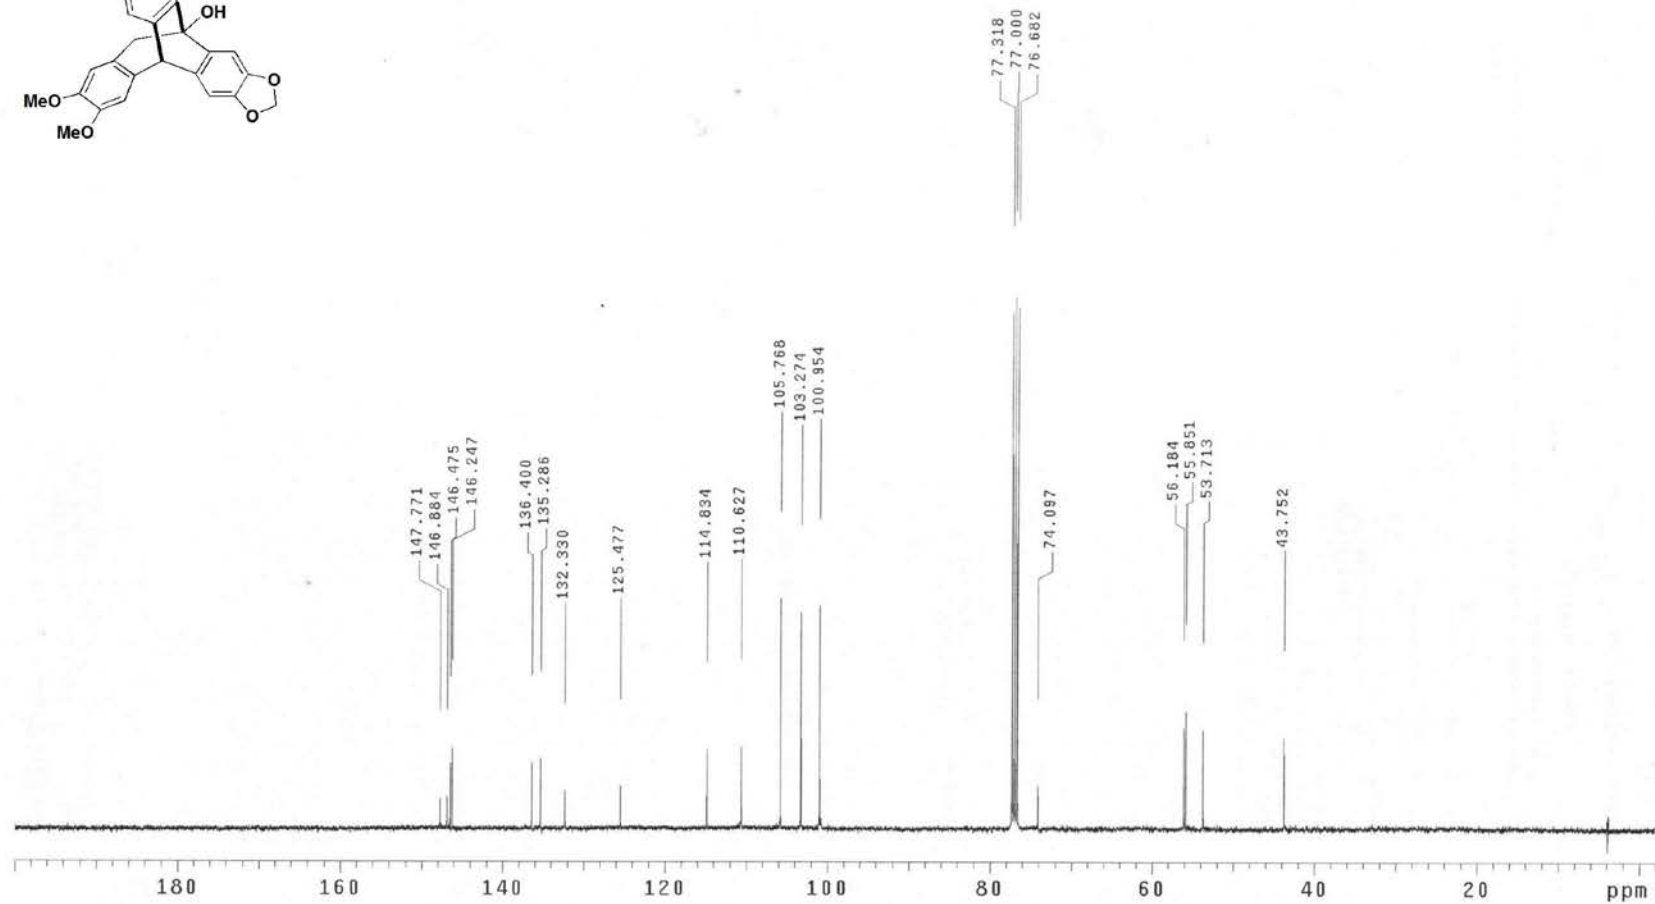

# Compound 5h (<sup>1</sup>H-NMR spectral data)

SH[3.2.2]5h

Pulse Sequence: s2pu1

UNITYplus-400 "unity400"

Date: May 15 2019

Solvent: CDC13

Ambient temperature

Total 32 repetitions

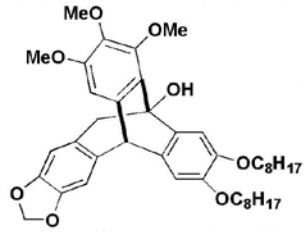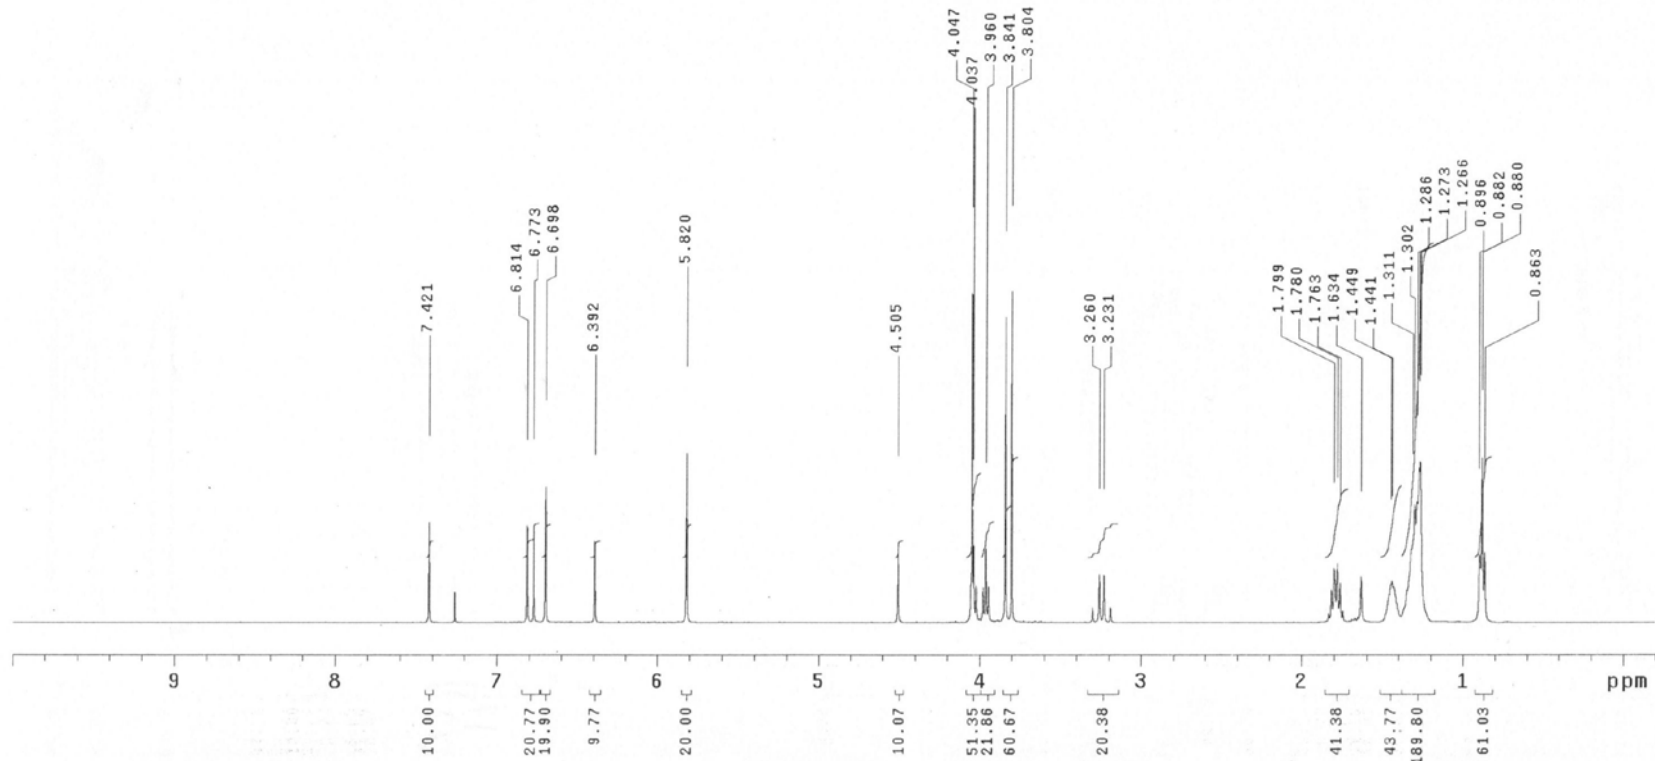

# Compound 5h (<sup>13</sup>C-NMR spectral data)

SH[3.2.2]5h

Pulse Sequence: s2pu1

UNITYplus-400 "unity400"

Date: May 15 2019

Solvent: CDCl<sub>3</sub>

Ambient temperature

Total 3248 repetitions

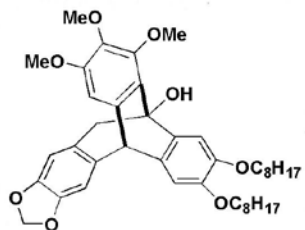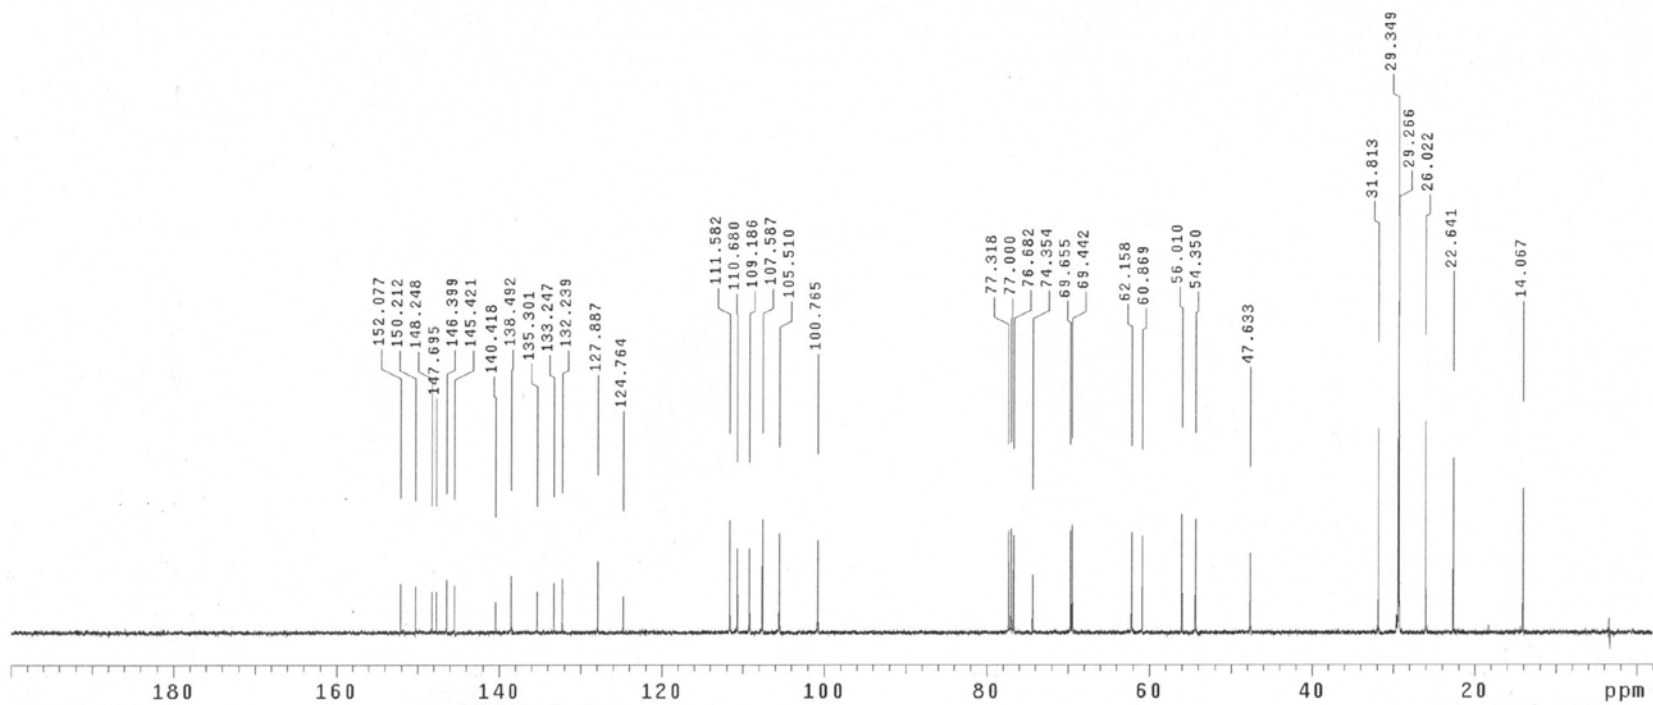

# Compound 5i (<sup>1</sup>H-NMR spectral data)

SH[3.2.2]5i

Pulse Sequence: s2pu1  
 UNITYplus-400 "unity400"  
 Date: May 14 2019  
 Solvent: CDCl<sub>3</sub>  
 Ambient temperature  
 Total 32 repetitions

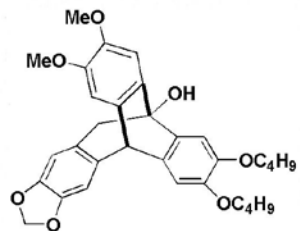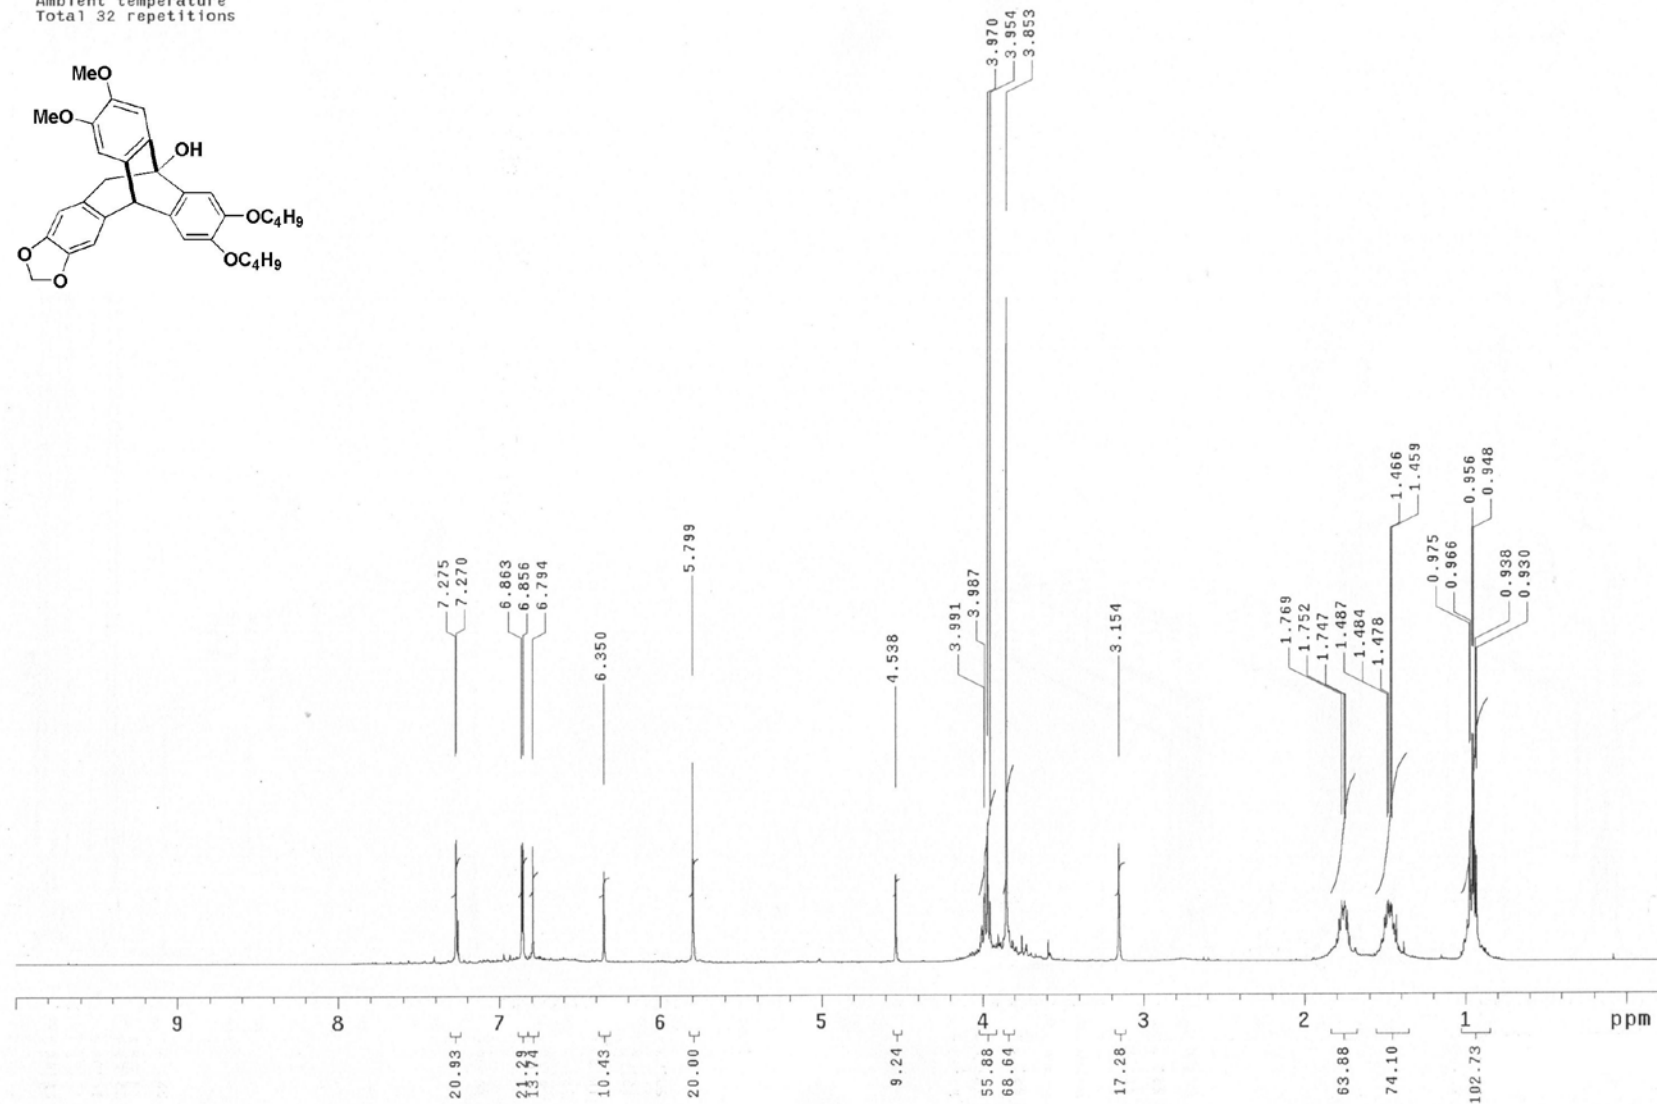

# Compound 5i (<sup>13</sup>C-NMR spectral data)

SH[3.2.2]5i

Pulse Sequence: s2pu1  
UNITYplus-400 "unity400"  
Date: May 14 2019  
Solvent: CDC13  
Ambient temperature  
Total 5360 repetitions

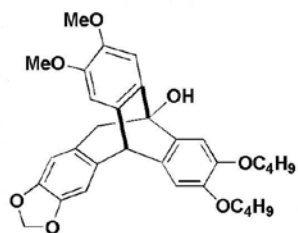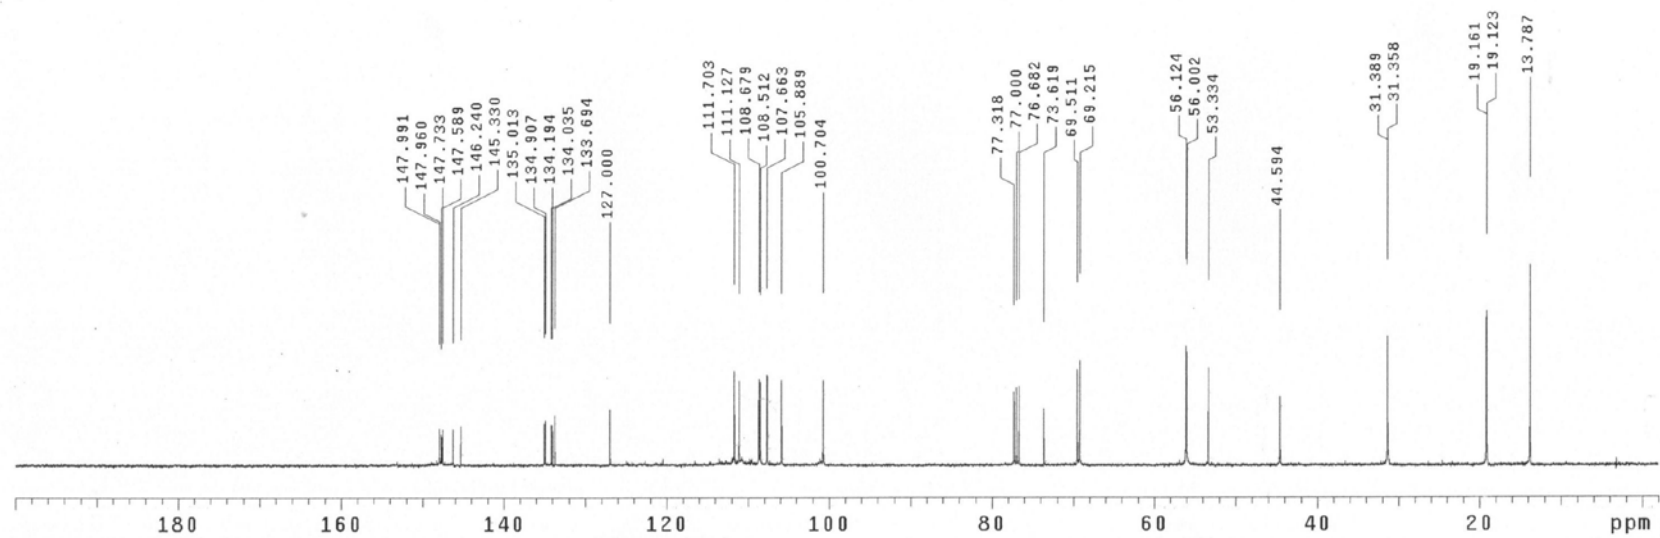

# Compound 5j (<sup>1</sup>H-NMR spectral data)

SH[3.2.]5j

Pulse Sequence: s2pu1

UNITYplus-400 "unity400"

Date: Jan 29 2019

Solvent: CDCl<sub>3</sub>

Ambient temperature

Total 32 repetitions

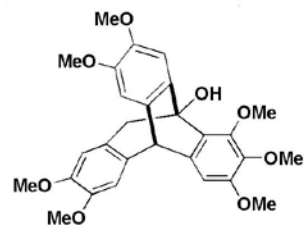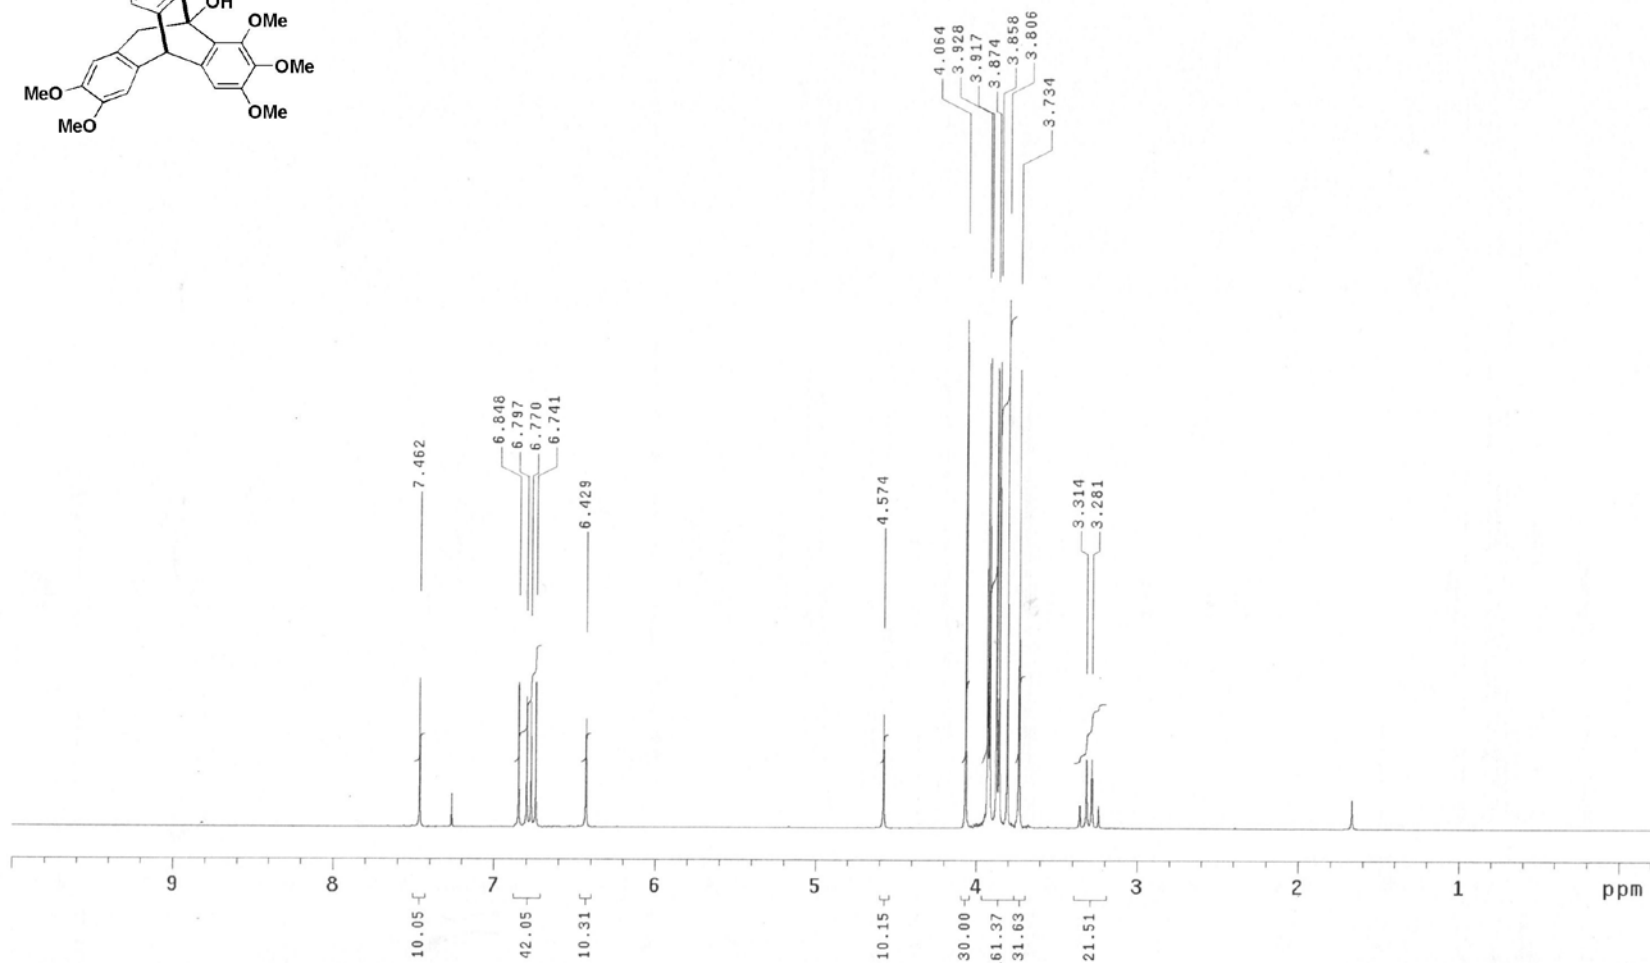

# Compound 5j (<sup>13</sup>C-NMR spectral data)

SH[3.2.]5J

Pulse Sequence: s2pu1

UNITYplus-400 "unity400"

Date: Jan 29 2019

Solvent: CDCl<sub>3</sub>

Ambient temperature

Total 768 repetitions

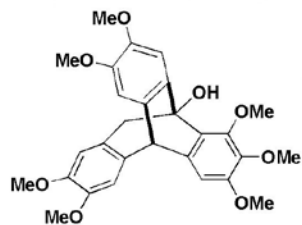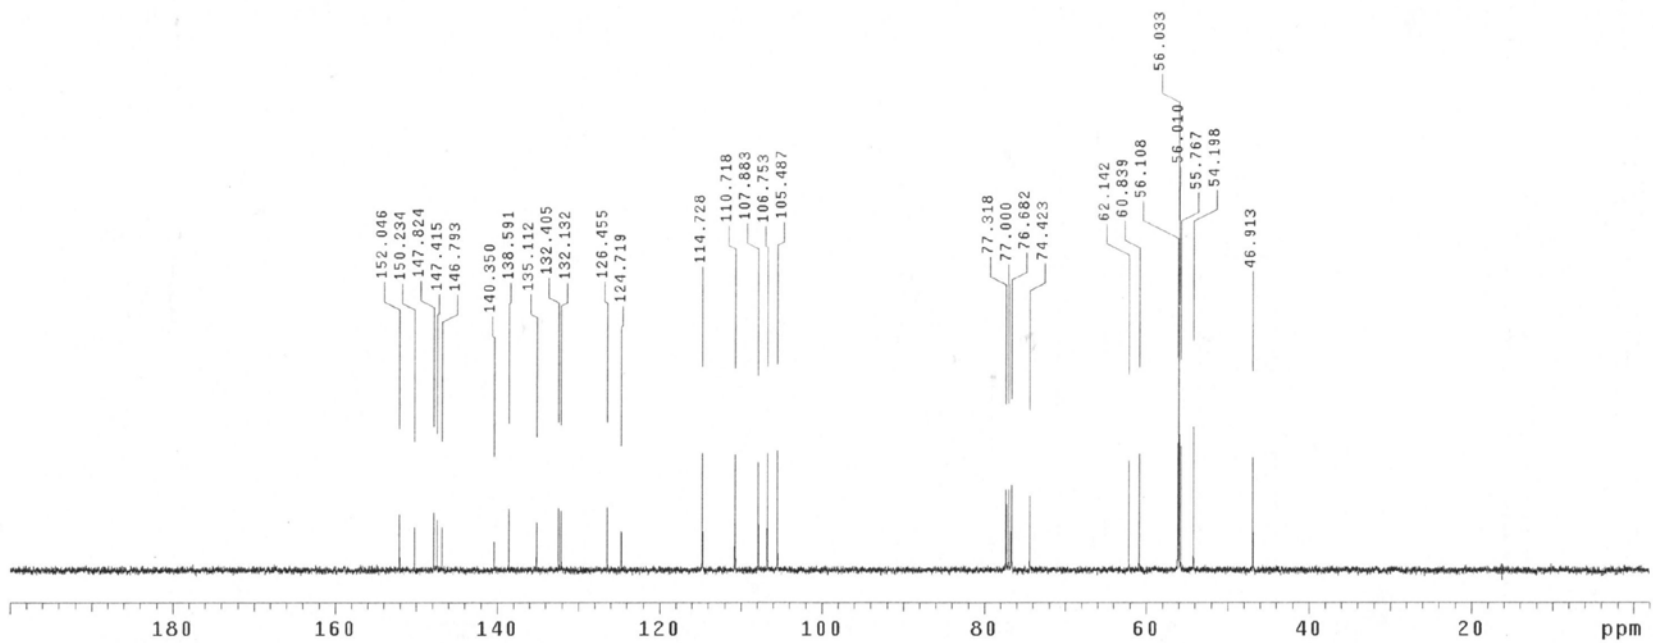

# Compound 5k (<sup>1</sup>H-NMR spectral data)

SH[3.2.2]5k

Pulse Sequence: s2pul  
UNITYplus-400 "unity400"  
Date: Jan 23 2019  
Solvent: CDCl<sub>3</sub>  
Ambient temperature  
Total 32 repetitions

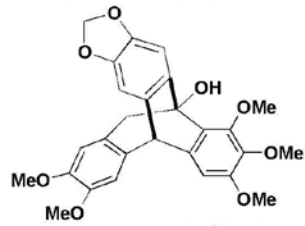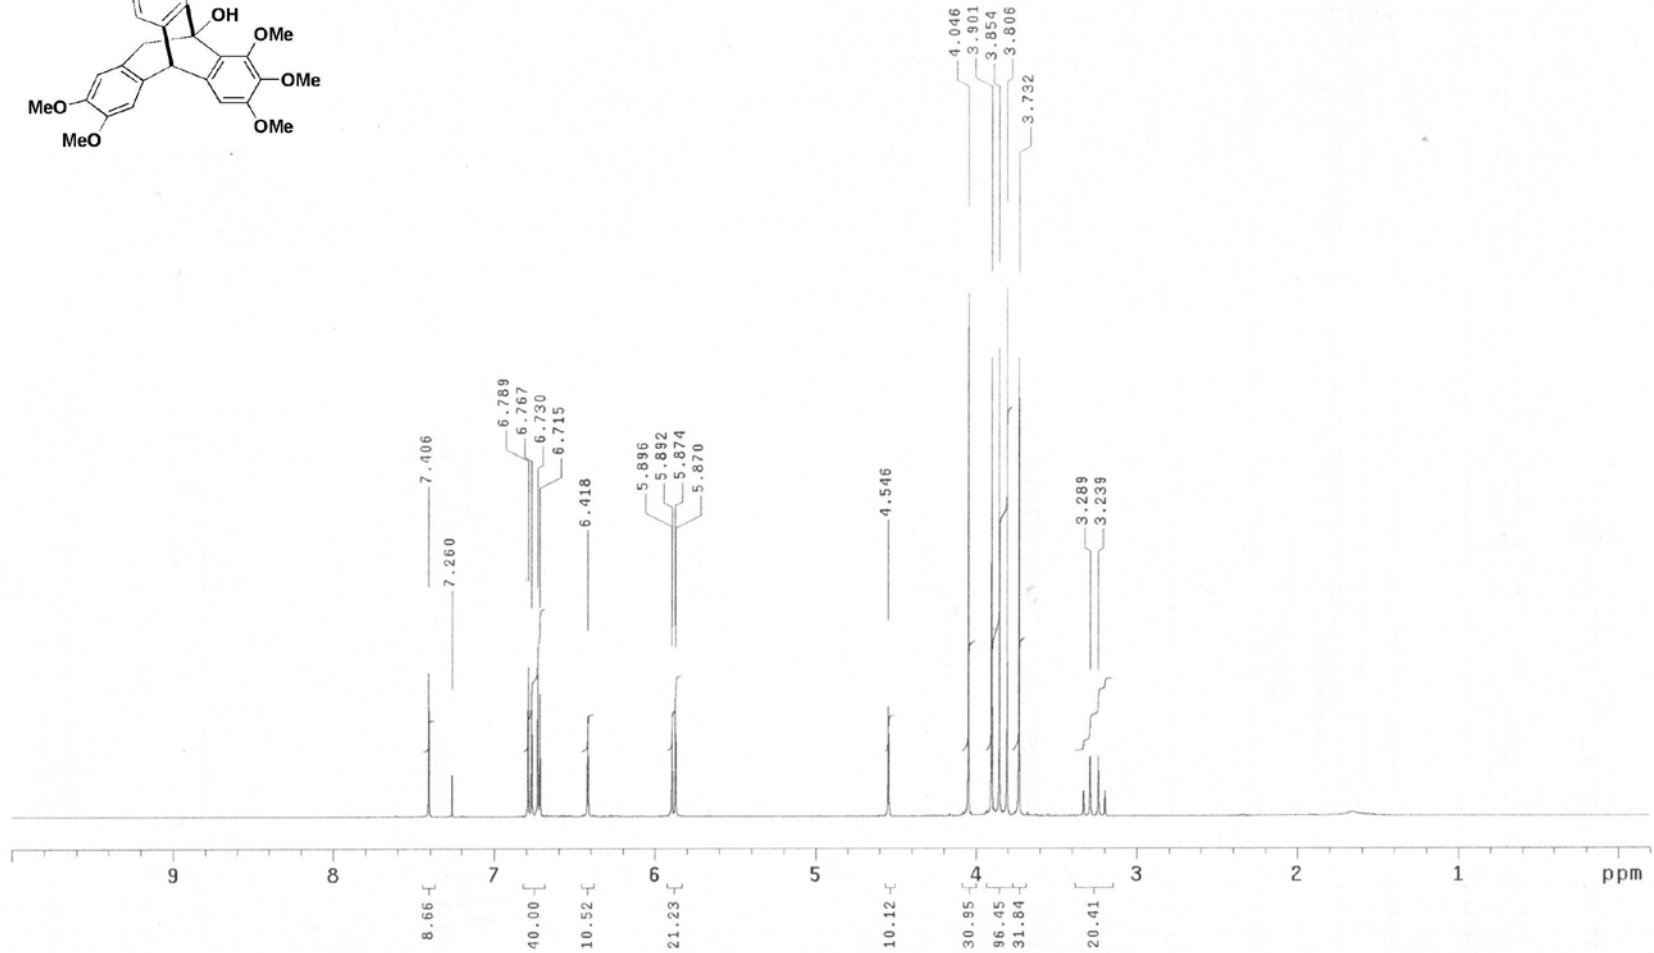



# Compound 5k (<sup>13</sup>C-NMR spectral data)

SH[3.2.2]5k

Pulse Sequence: s2pu1

UNITYplus-400 "unity400"

Date: Jan 23 2019

Solvent: CDC13

Ambient temperature

Total 944 repetitions

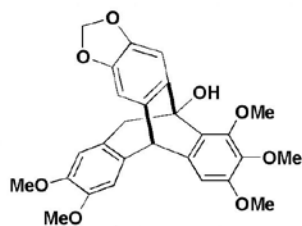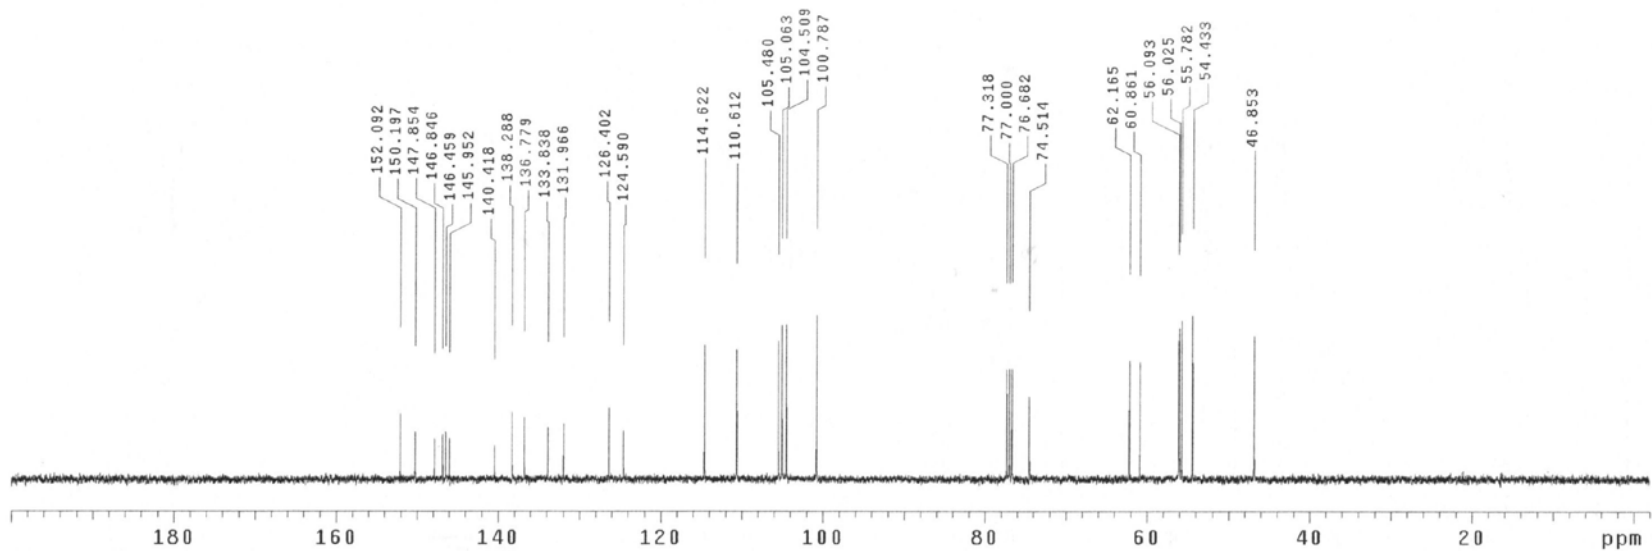

# Compound 5I (<sup>1</sup>H-NMR spectral data)

SH[3.2.2]5I

Pulse Sequence: s2pu1

UNITYplus-400 "unity400"

Date: Apr 30 2019

Solvent: CDCl<sub>3</sub>

Ambient temperature

Total 32 repetitions

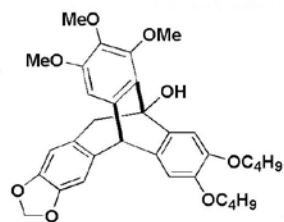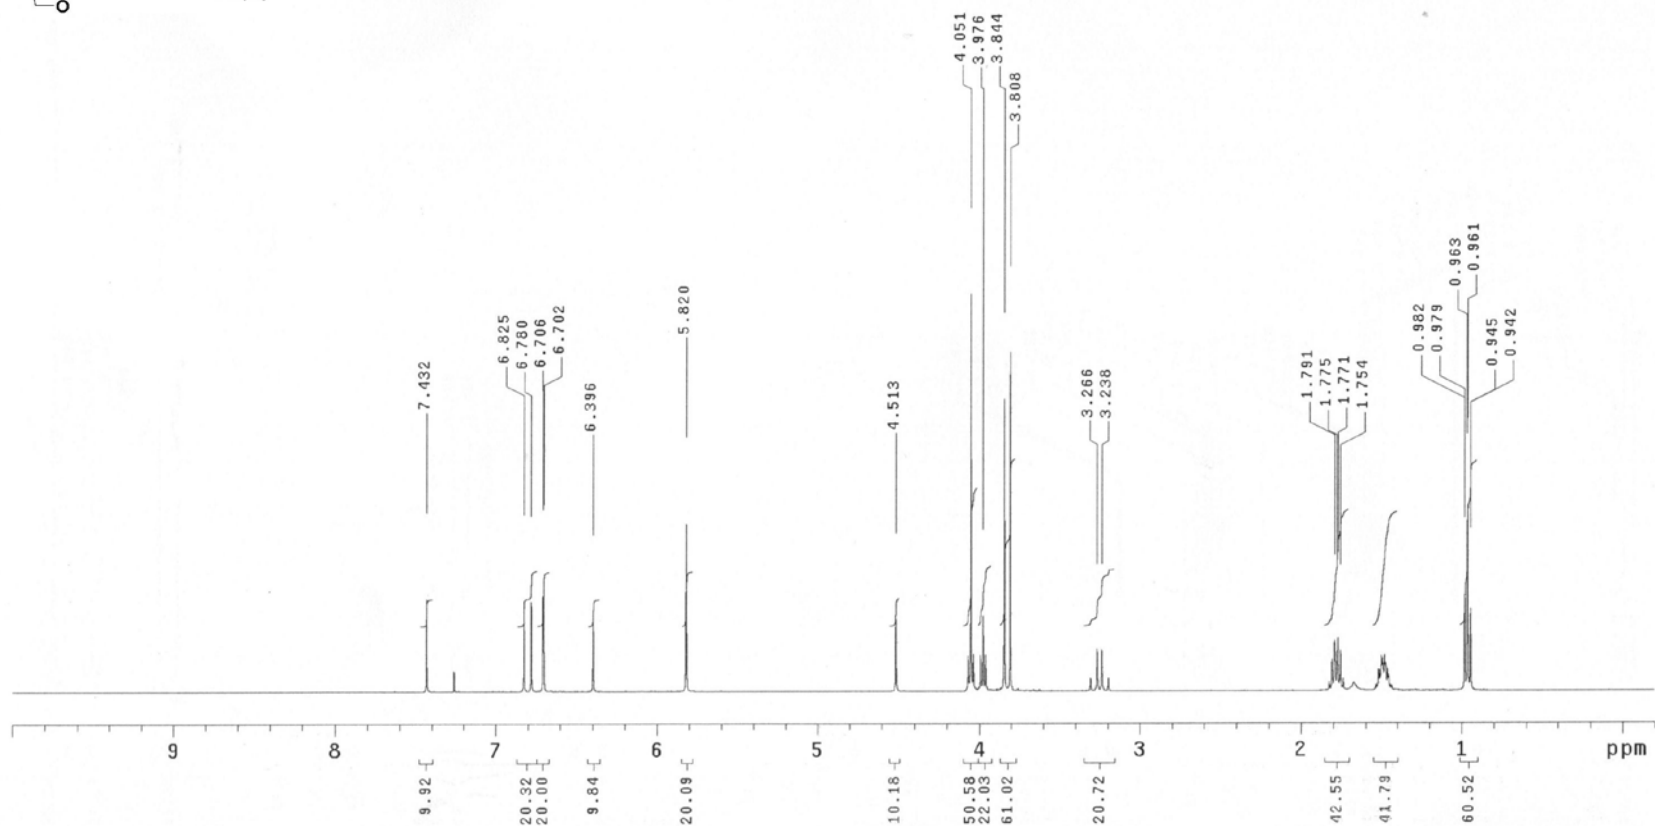

# Compound 5I (<sup>13</sup>C-NMR spectral data)

SH[3.2.2]5I

Pulse Sequence: s2pu1

UNITYplus-400 "unity400"

Date: Apr 30 2019

Solvent: CDCl<sub>3</sub>

Ambient temperature

Total 1024 repetitions

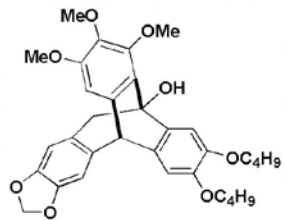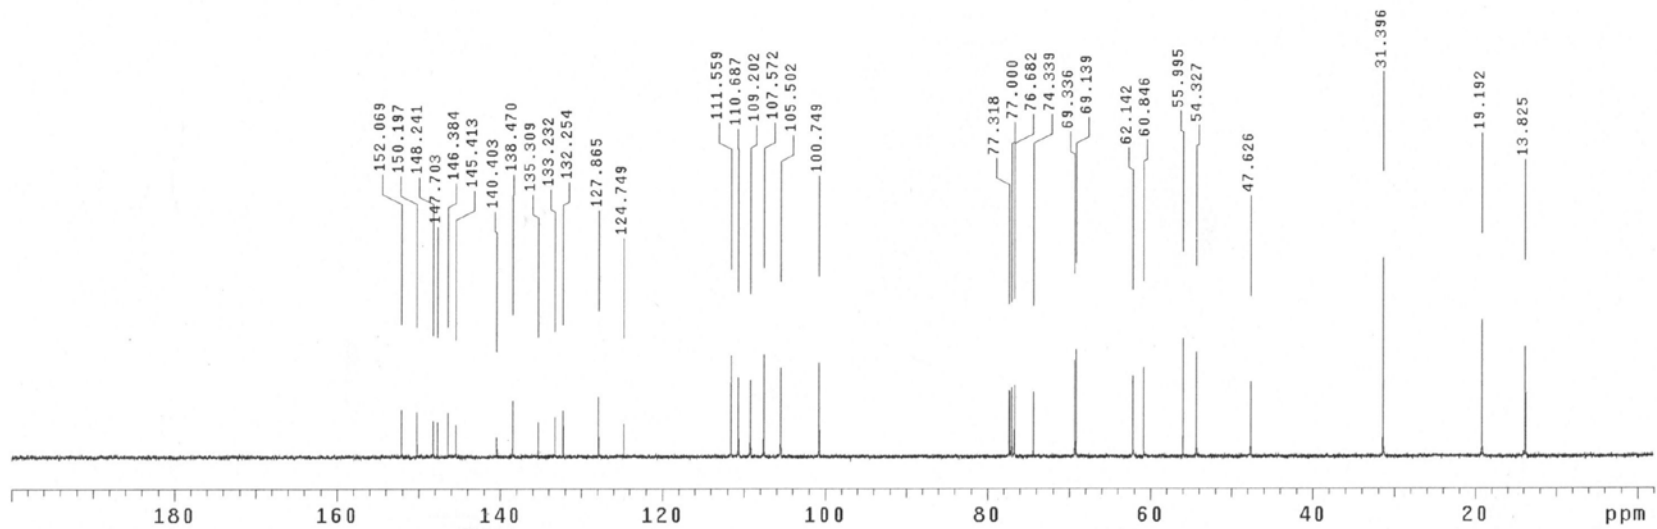

# Compound 5m (<sup>1</sup>H-NMR spectral data)

SH[3.2.2]5m

Pulse Sequence: s2pu1  
UNITYplus-400 "unity400"  
Date: Jan 10 2019  
Solvent: CDC13  
Ambient temperature  
Total 32 repetitions

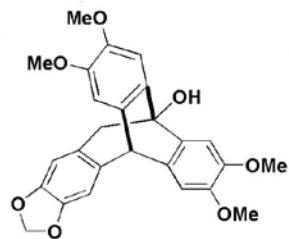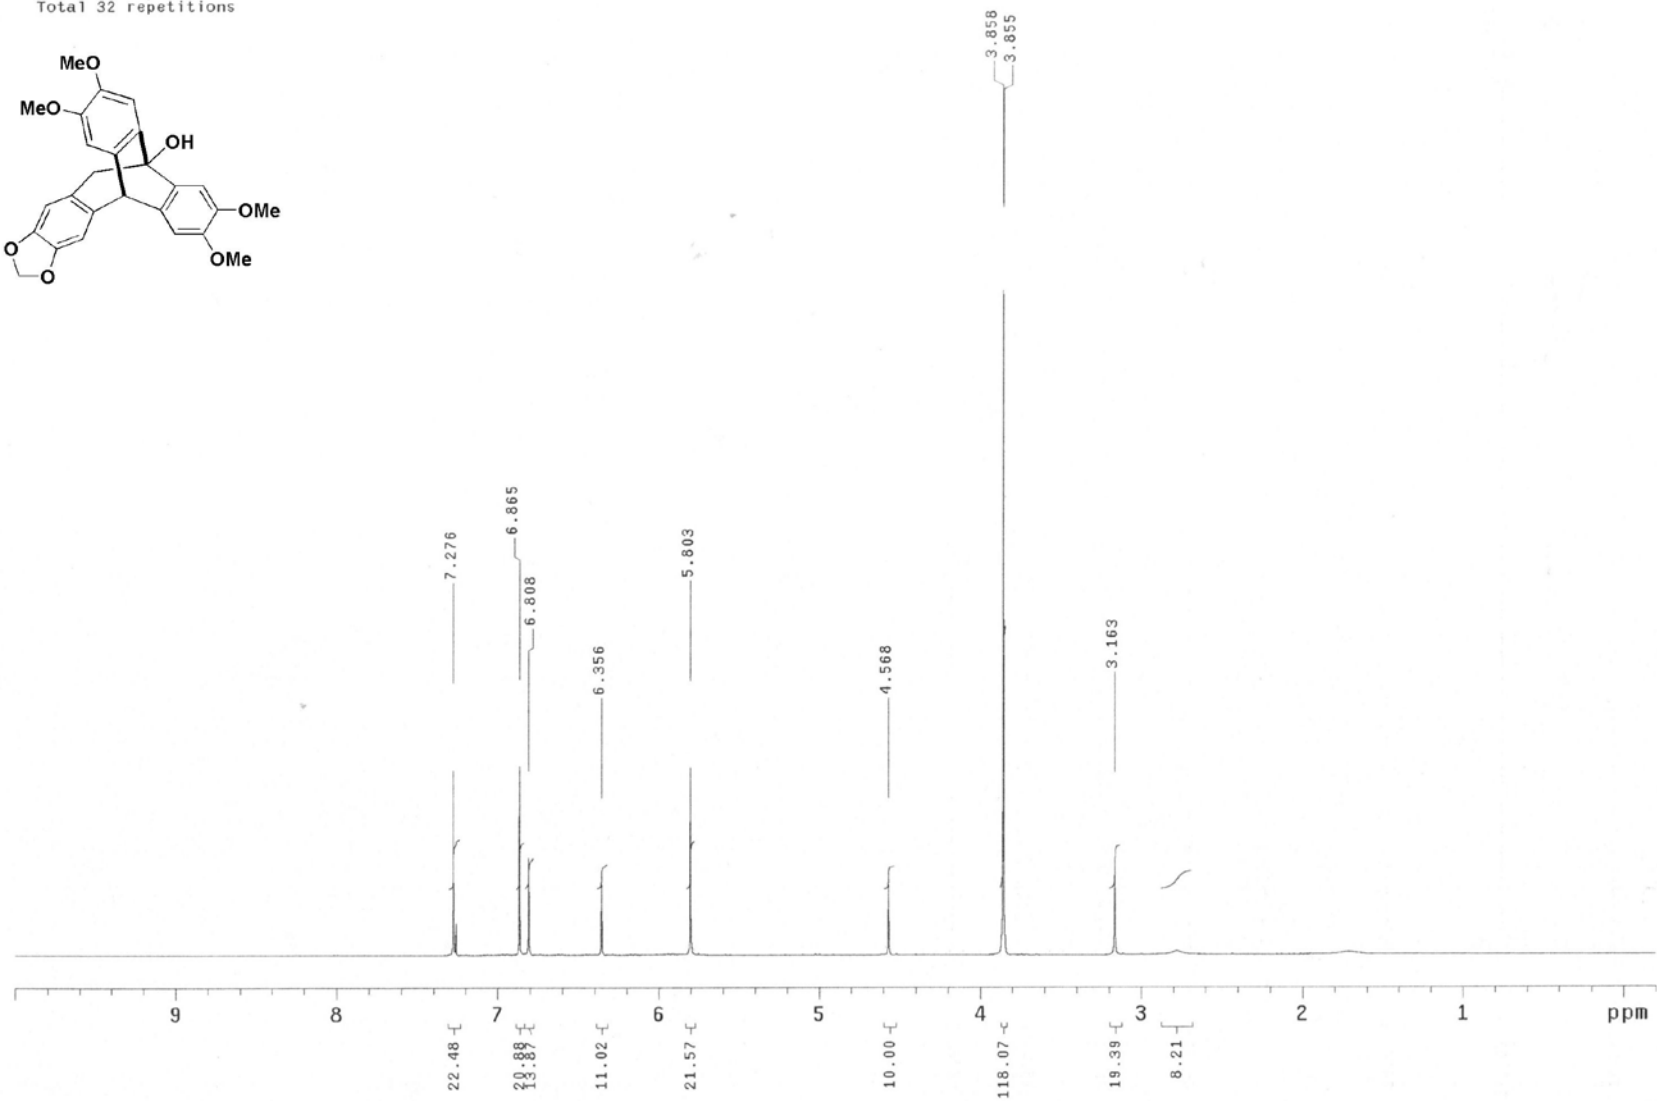

# Compound 5m (<sup>13</sup>C-NMR spectral data)

SH[3.2.2]5m

Pulse Sequence: s2pu1

UNITYplus-400 "unity400"

Date: Jan 10 2019

Solvent: CDCl<sub>3</sub>

Ambient temperature

Total 1168 repetitions

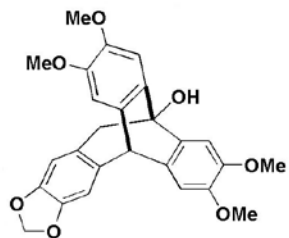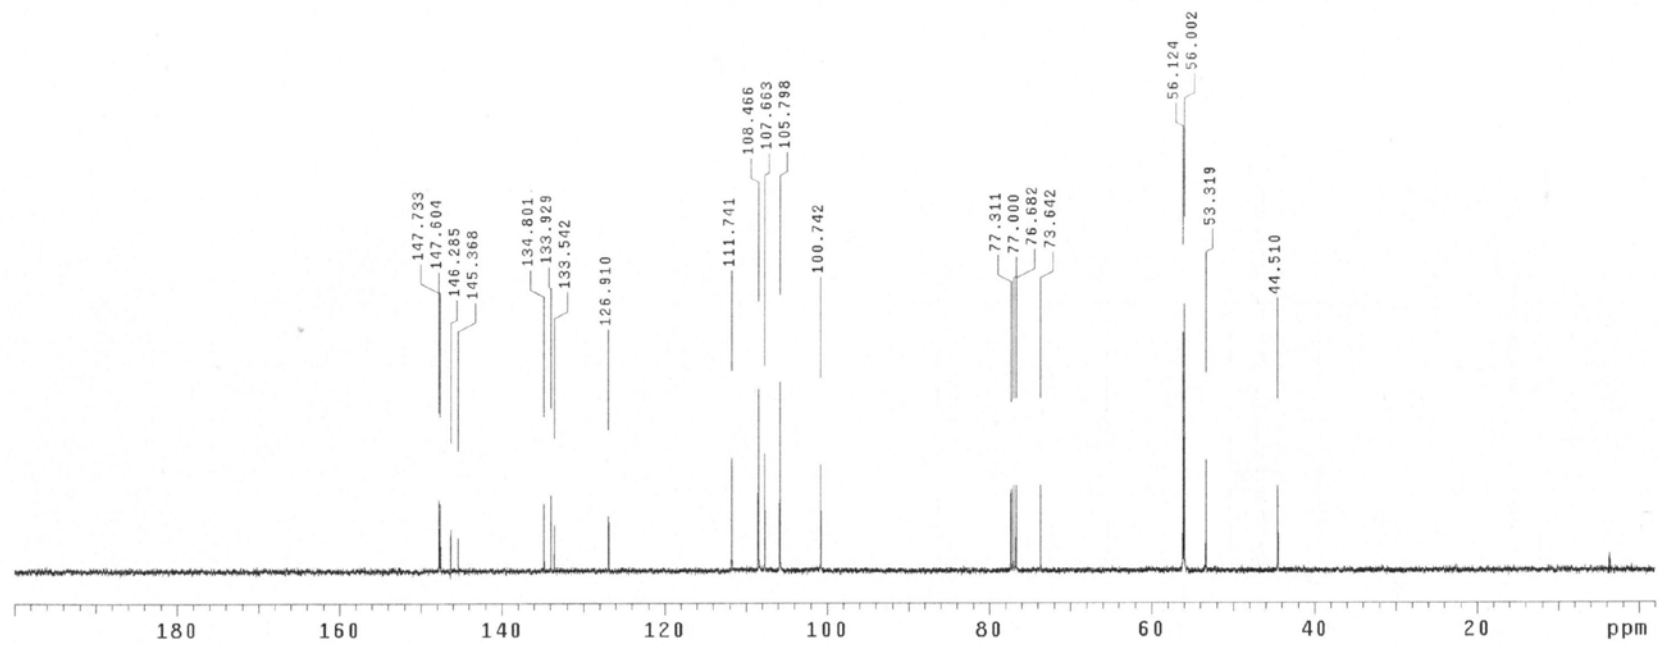

# Compound 5n (<sup>1</sup>H-NMR spectral data)

SH[3.2.2]5n

Pulse Sequence: s2pul

UNITYplus-400 "unity400"

Date: Jan 4 2019

Solvent: CDCl<sub>3</sub>

Ambient temperature

Total 32 repetitions

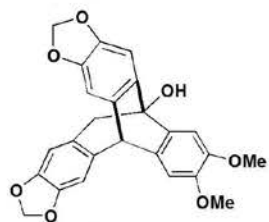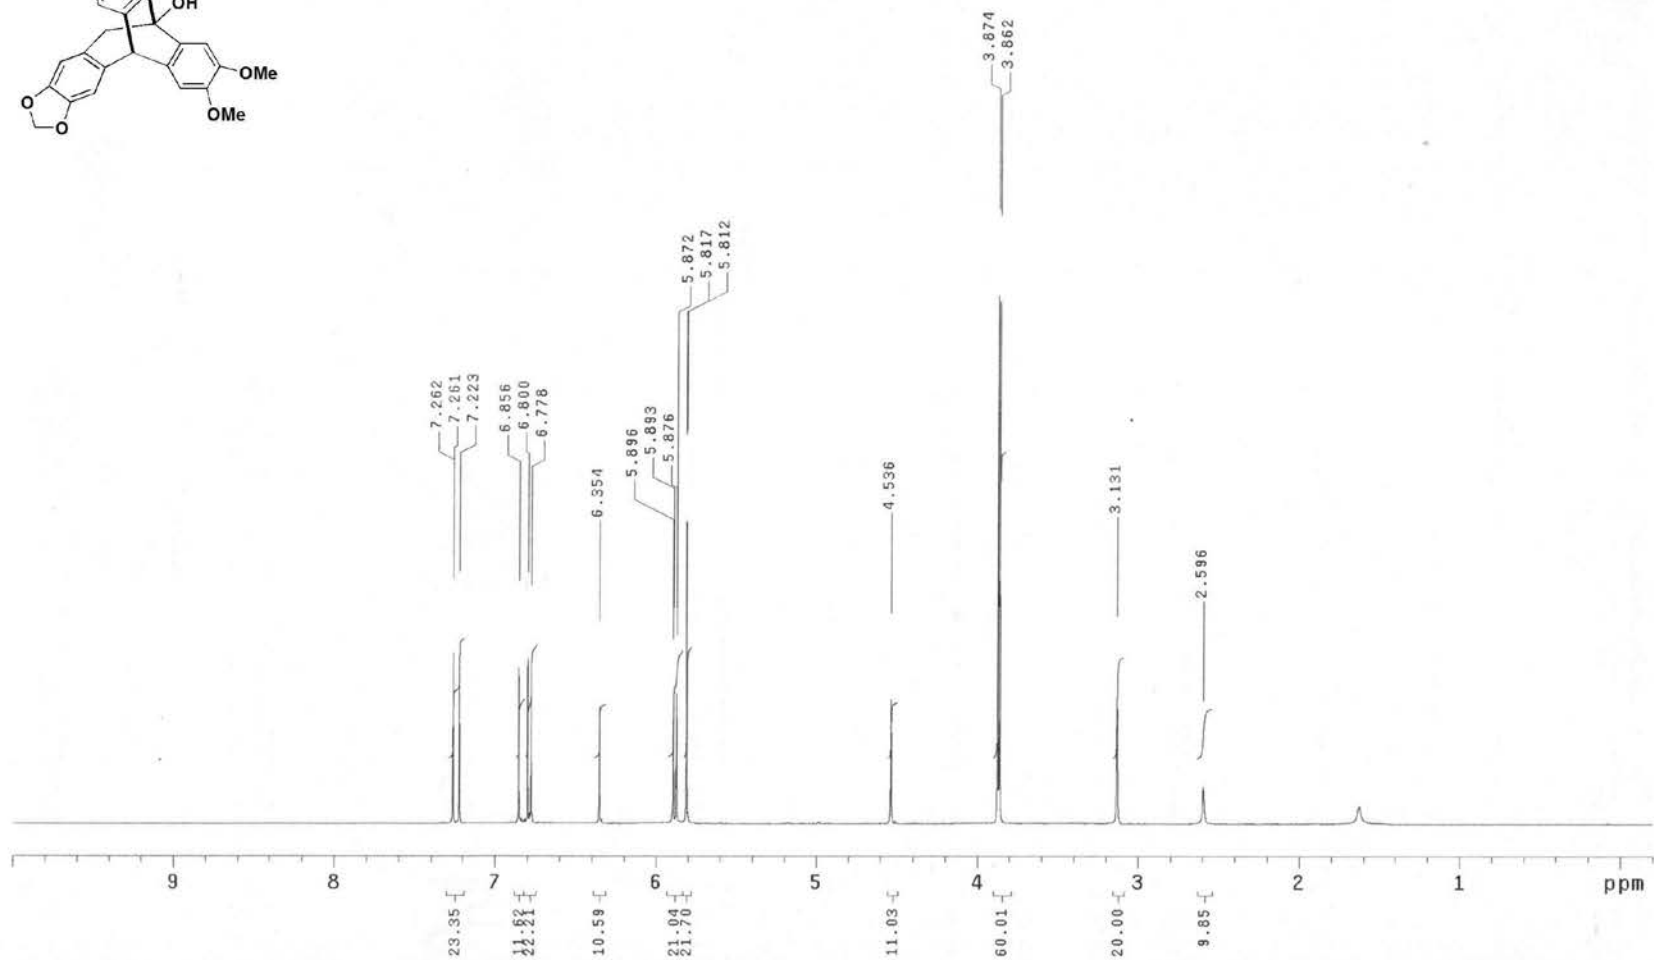

# Compound 5n (<sup>13</sup>C-NMR spectral data)

SH[3.2.2]5n

Pulse Sequence: s2pu1

UNITYplus-400 "unity400"

Date: Jan 4 2019

Solvent: CDC13

Ambient temperature

Total 2432 repetitions

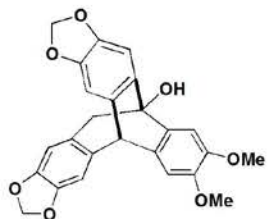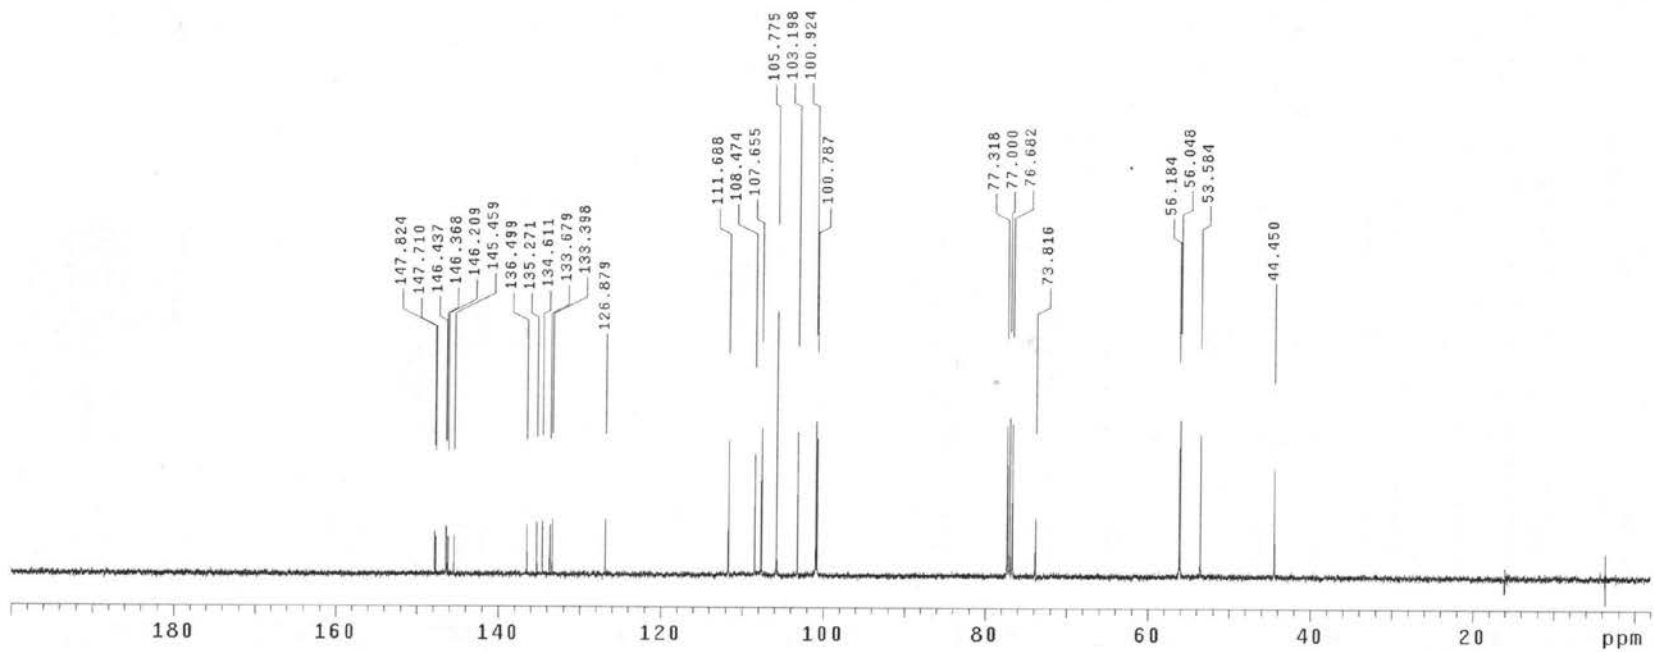

# Compound 5o (<sup>1</sup>H-NMR spectral data)

SH[3.2.2]5o

Pulse Sequence: s2pu1  
UNITYplus-400 "unity400"  
Date: Feb 18 2019  
Solvent: CDCl3  
Ambient temperature  
Total 32 repetitions

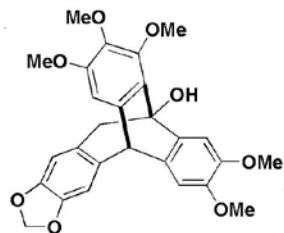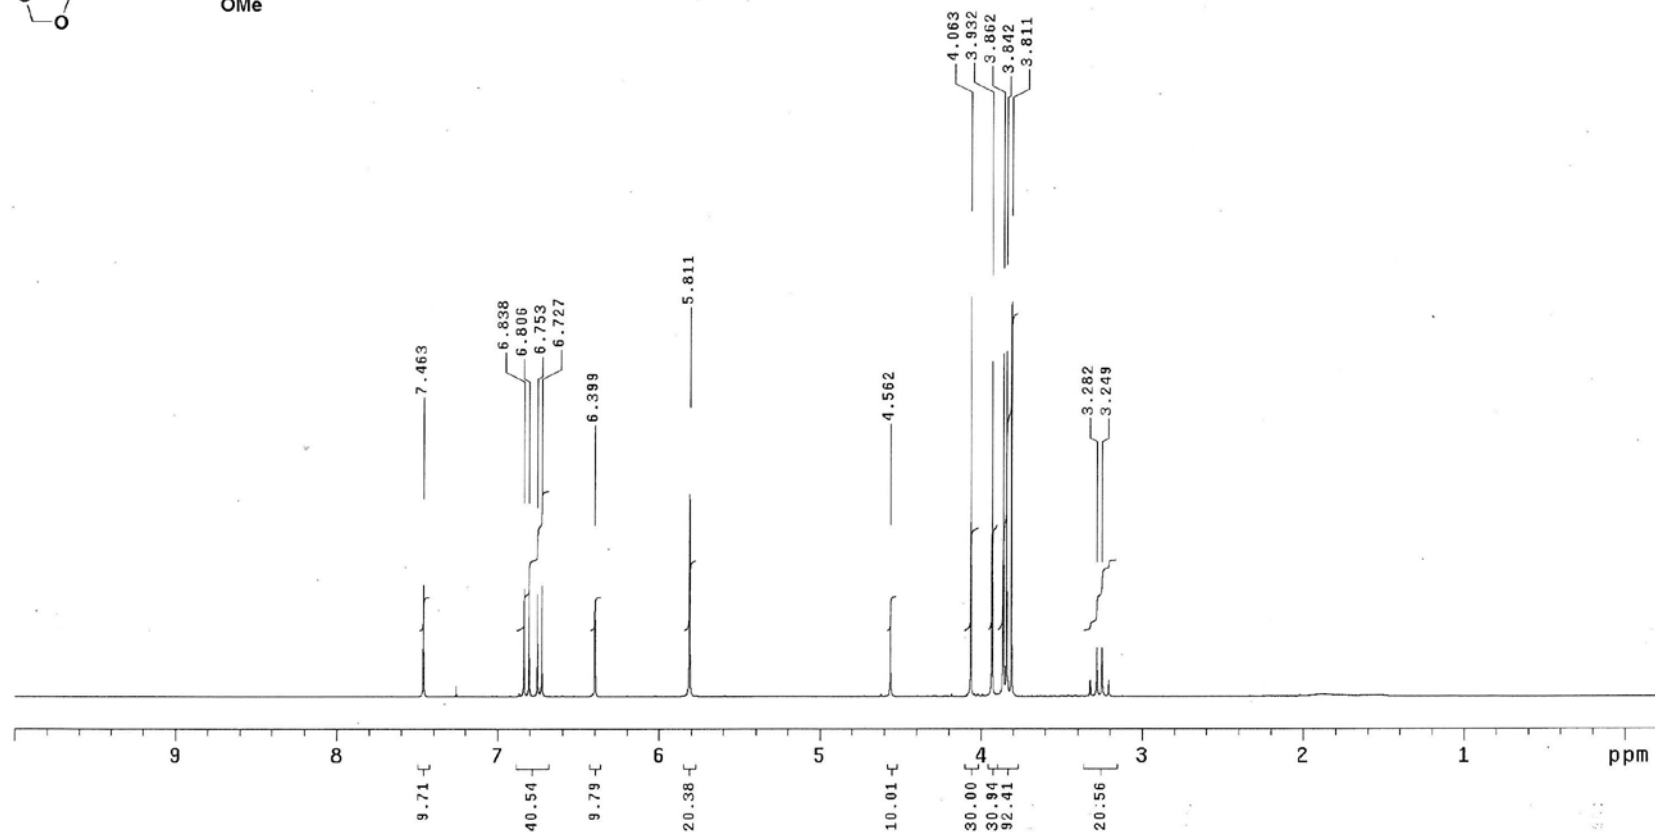



# Compound 5o (<sup>13</sup>C-NMR spectral data)

SH[3.2.2]5o

Pulse Sequence: s2pu1

UNITYplus-400 "unity400"

Date: Feb 18 2019

Solvent: CDC13

Ambient temperature

Total 480 repetitions

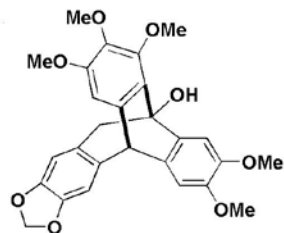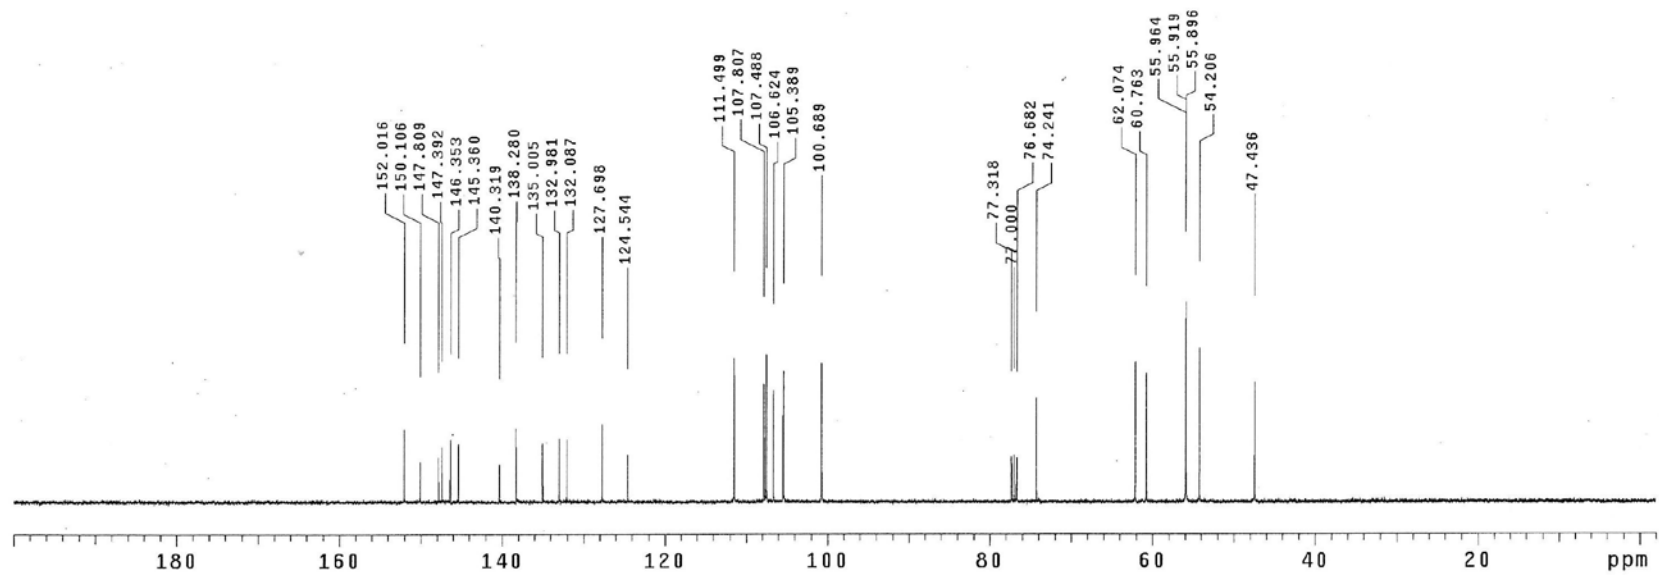

# Compound 5p (<sup>1</sup>H-NMR spectral data)

SH[3.2.2]5p

Pulse Sequence: s2pu1

UNITYplus-400 "unity400"

Date: Jan 23 2019

Solvent: CDCl<sub>3</sub>

Ambient temperature

Total 32 repetitions

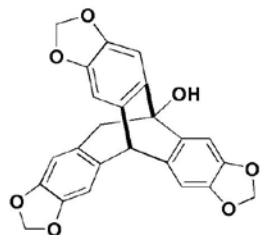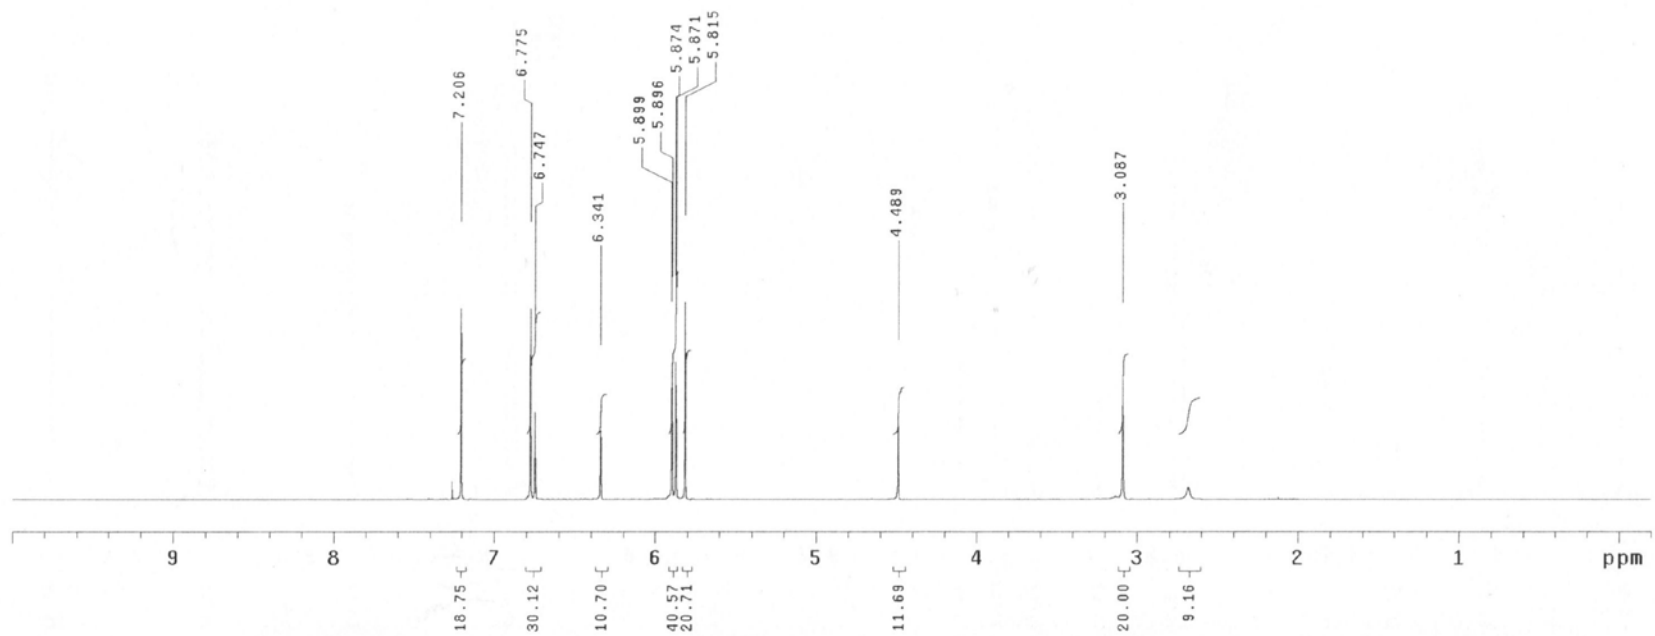

# Compound 5p (<sup>13</sup>C-NMR spectral data)

SH[3.2.2]5p

Pulse Sequence: s2pu1

UNITYplus-400 "unity400"

Date: Jan 23 2019

Solvent: CDCl<sub>3</sub>

Ambient temperature

Total 768 repetitions

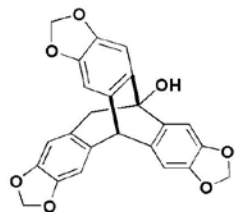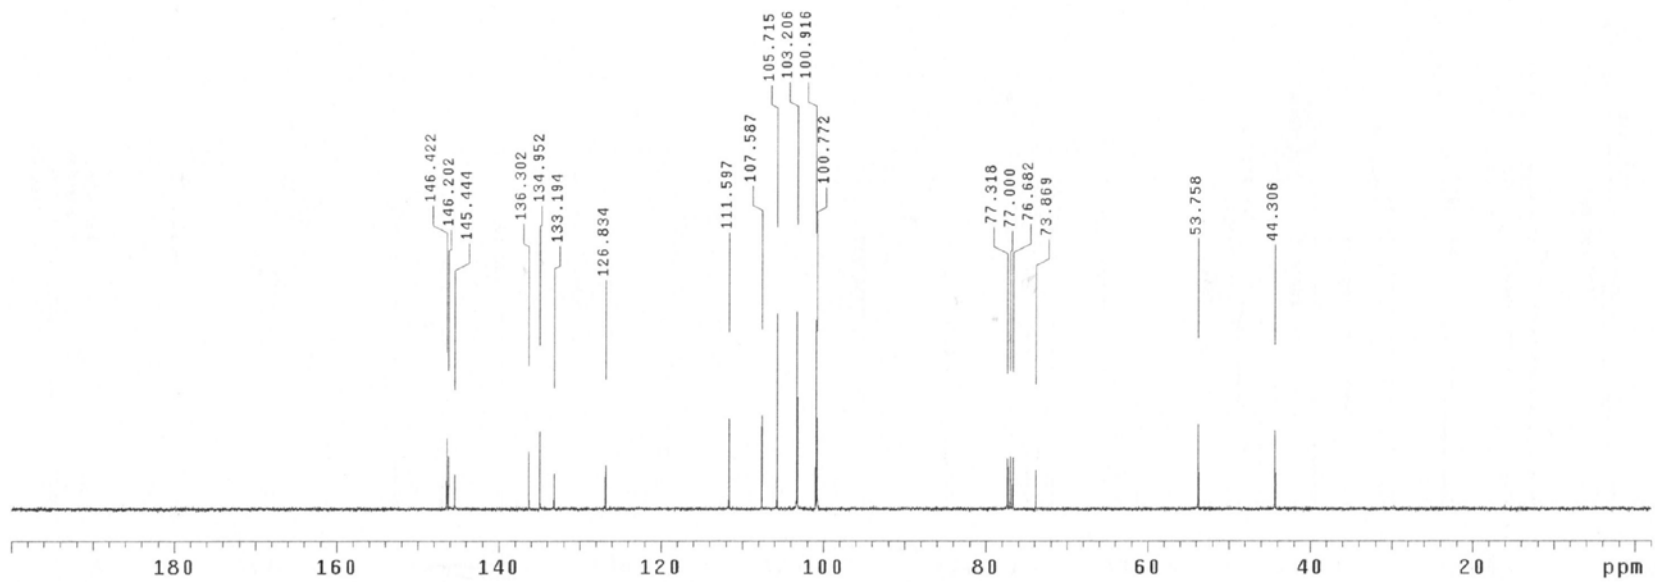

# Compound 5q (<sup>1</sup>H-NMR spectral data)

SH[3.2.2]5q

Pulse Sequence: s2pu1  
 UNITYplus-400 "unity400"  
 Date: May 20 2019  
 Solvent: CDCl3  
 Ambient temperature  
 Total 64 repetitions

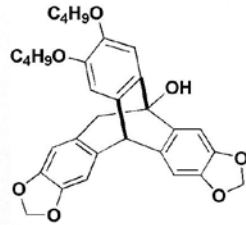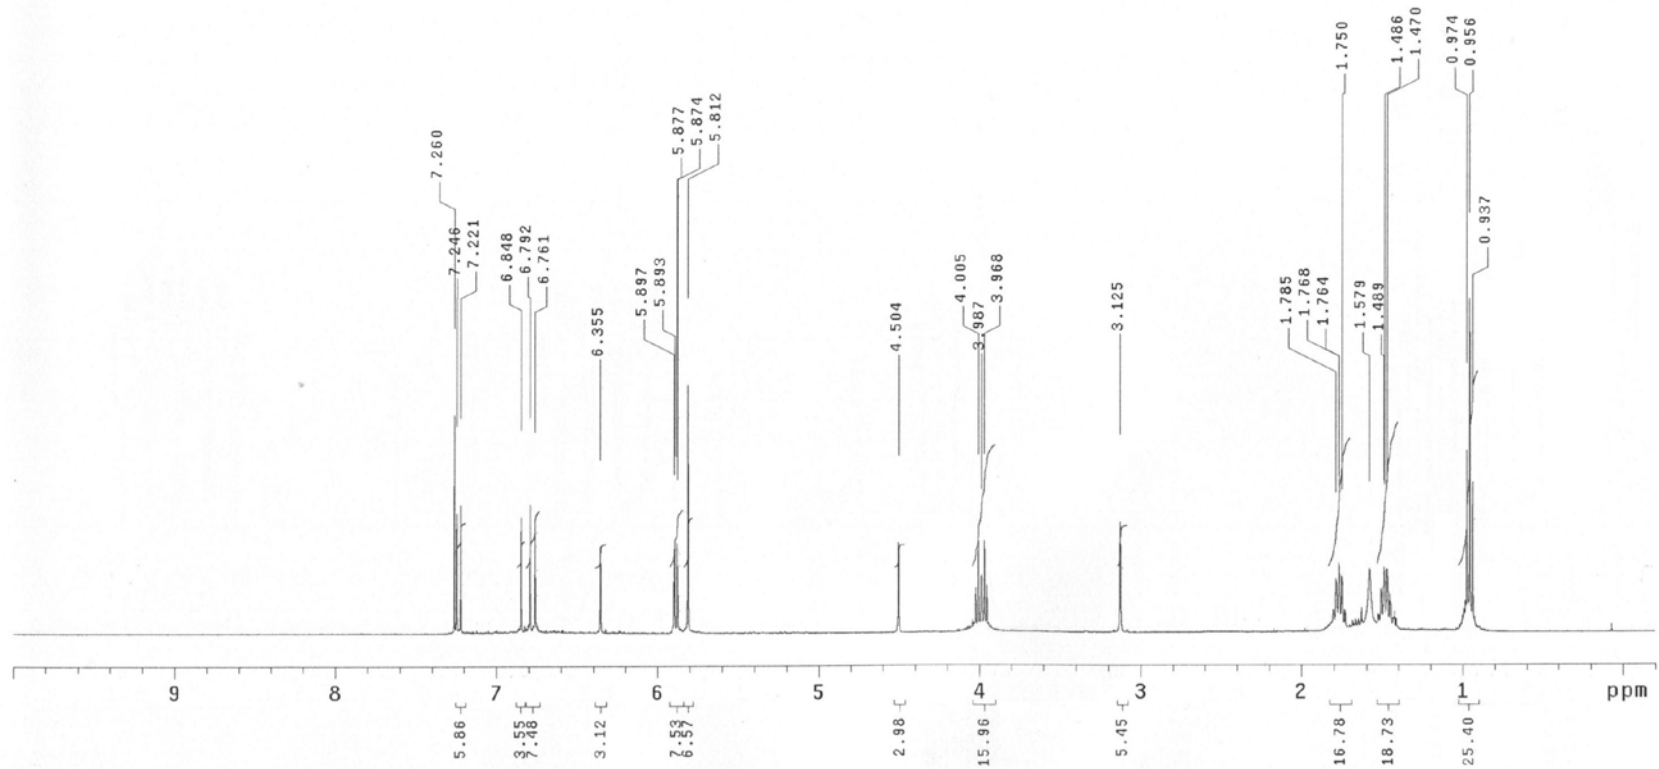

# Compound 5q (<sup>13</sup>C-NMR spectral data)

SH[3.2.2]5q

Pulse Sequence: s2pu1  
UNITYplus-400 "unity400"  
Date: May 20 2019  
Solvent: CDCl<sub>3</sub>  
Ambient temperature  
Total 28864 repetitions

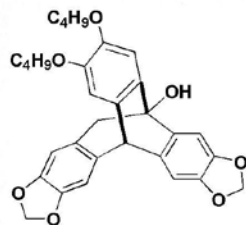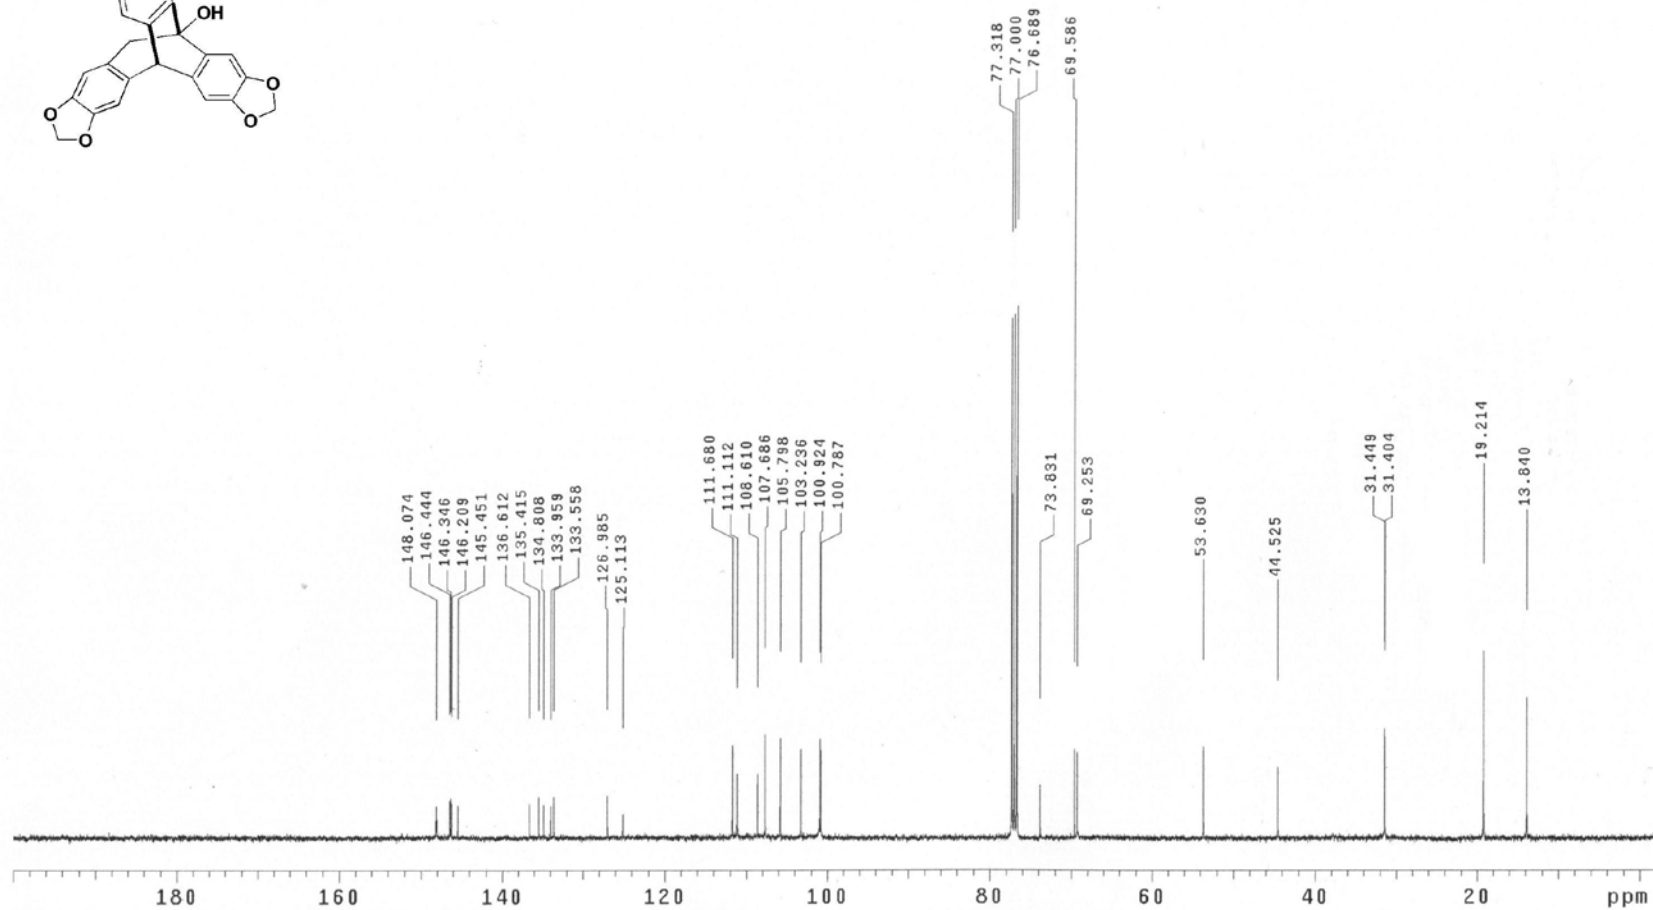

# Compound 5r (<sup>1</sup>H-NMR spectral data)

SH[3.2.2]5r-1

Pulse Sequence: s2pul

UNITYplus-400 "unity400"

Date: Jan 22 2019

Solvent: CDCl<sub>3</sub>

Ambient temperature

Total 32 repetitions

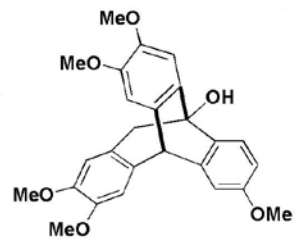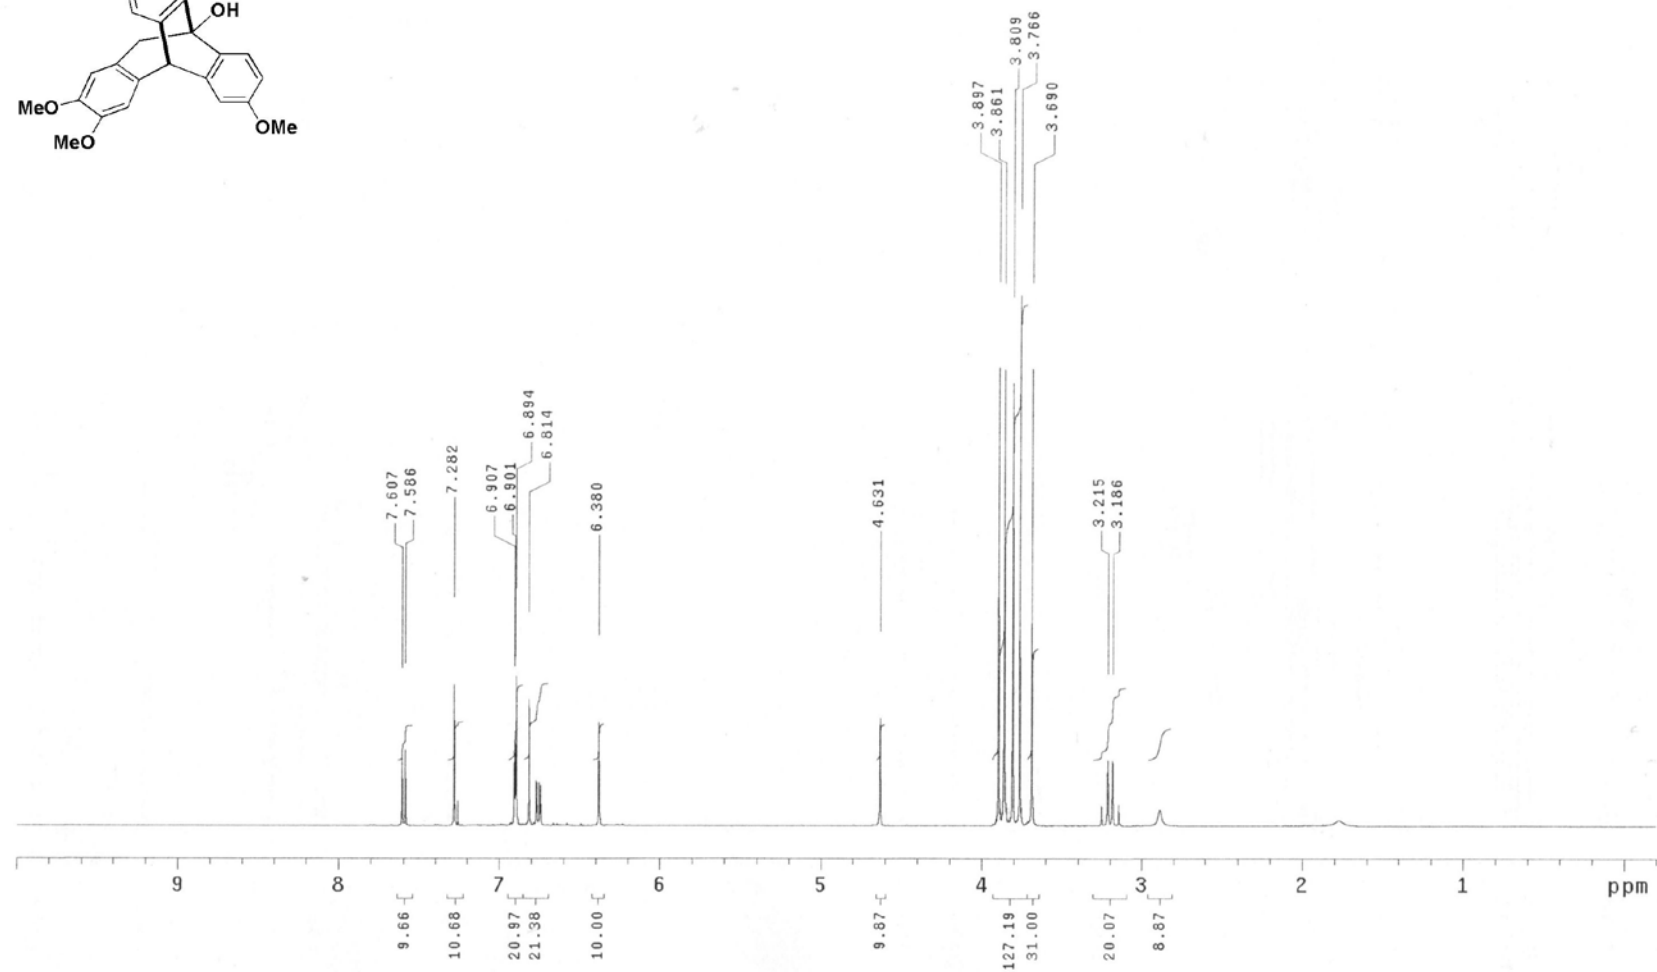

# Compound 5r (<sup>13</sup>C-NMR spectral data)

SH[3.2.2]5r-1

Pulse Sequence: s2pu1  
UNITYplus-400 "unity400"  
Date: Jan 22 2019  
Solvent: CDCl3  
Ambient temperature  
Total 464 repetitions

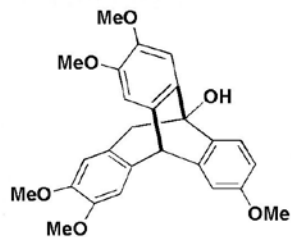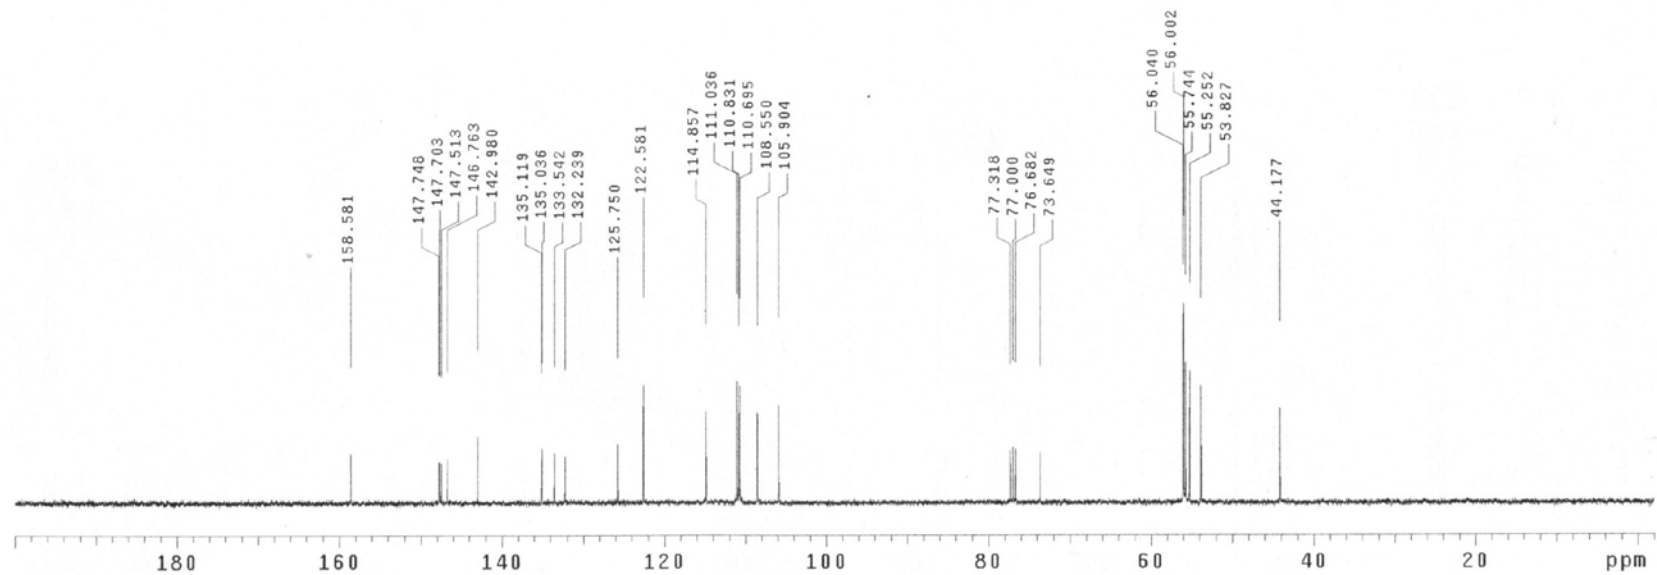

# Compound 5r-1 (<sup>1</sup>H-NMR spectral data)

SH[3.2.2]5r

Pulse Sequence: s2pu1

UNITYplus-400 "unity400"

Date: Jan 18 2019

Solvent: CDCl<sub>3</sub>

Ambient temperature

Total 32 repetitions

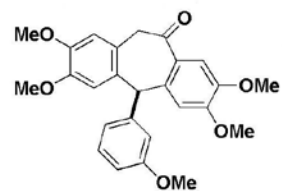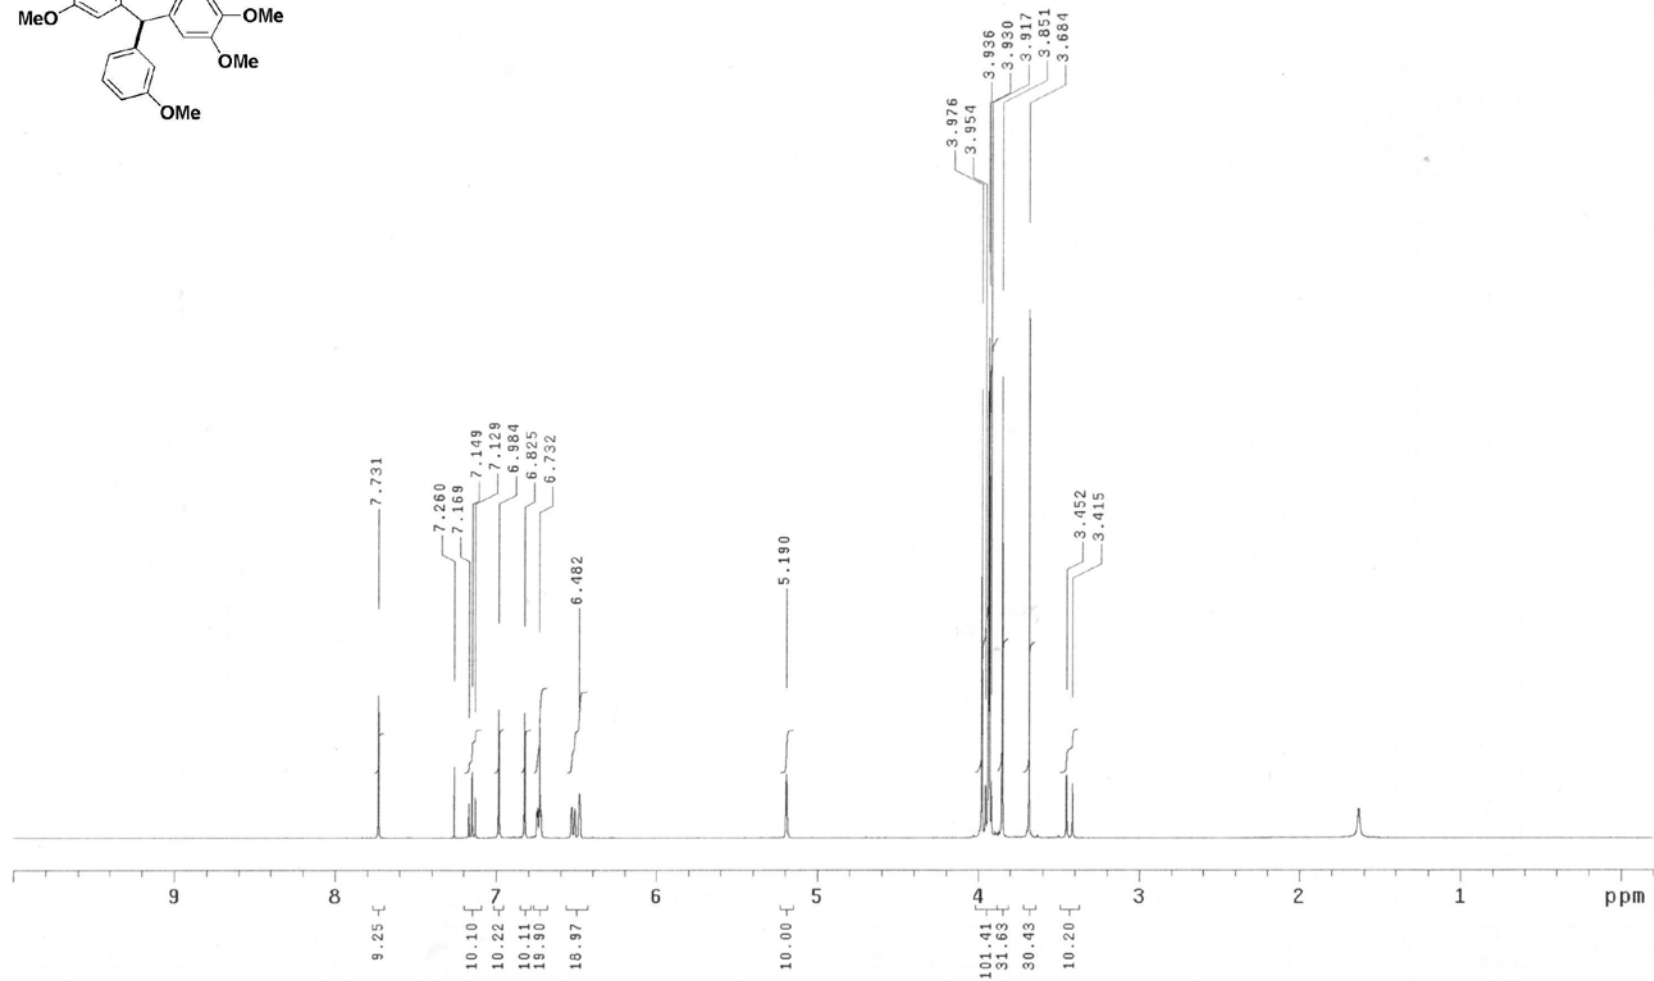



# Compound 5r-1 (<sup>13</sup>C-NMR spectral data)

SH[3.2.2]5r

Pulse Sequence: s2pu1  
UNITYplus-400 "unity400"  
Date: Jan 18 2019  
Solvent: CDCl3  
Ambient temperature  
Total 2544 repetitions

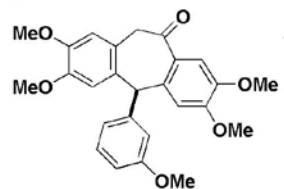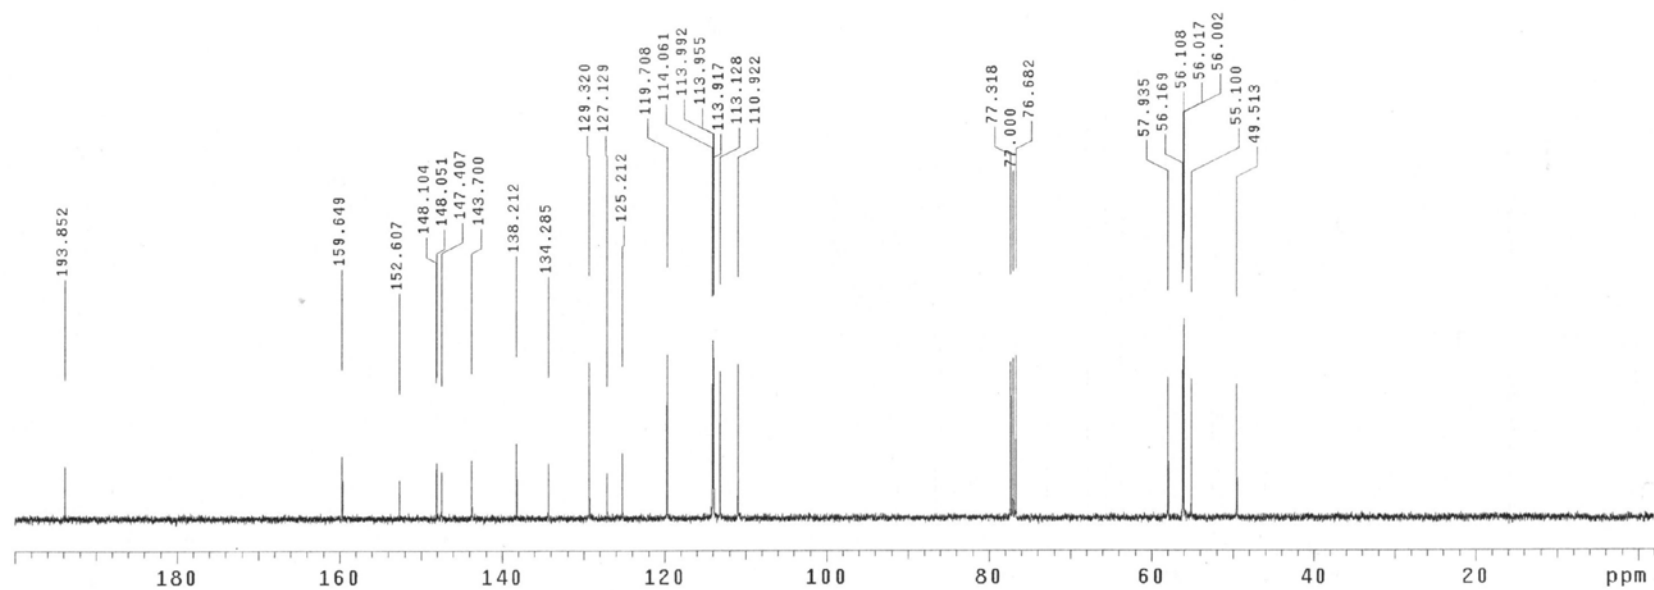

# Compound 5s-1 (<sup>1</sup>H-NMR spectral data)

SH[3.2.2]5s

Pulse Sequence: s2pu1  
UNITYplus-400 "unity400"  
Date: Jan 17 2019  
Solvent: CDCl<sub>3</sub>  
Ambient temperature  
Total 32 repetitions

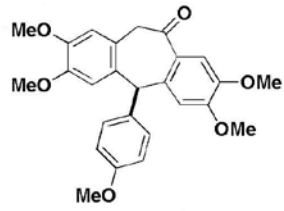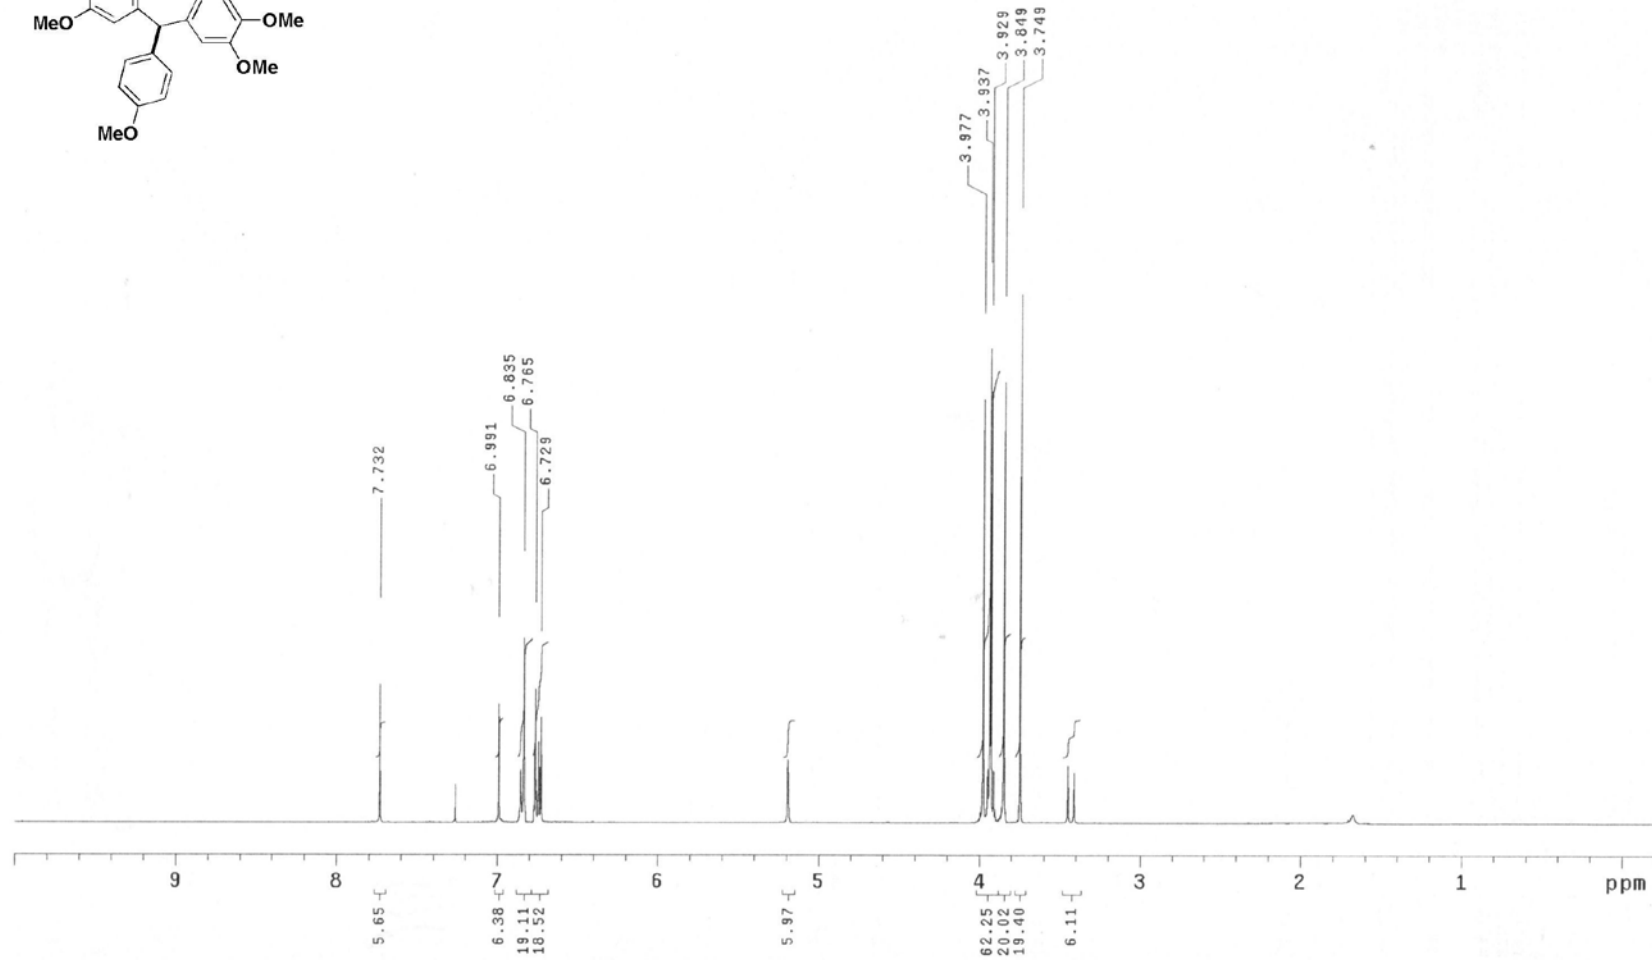

# Compound 5s-1 (<sup>13</sup>C-NMR spectral data)

SH[3.2.2]5s

Pulse Sequence: s2pu1

UNITYplus-400 "unity400"

Date: Jan 17 2019

Solvent: CDCl<sub>3</sub>

Ambient temperature

Total 1088 repetitions

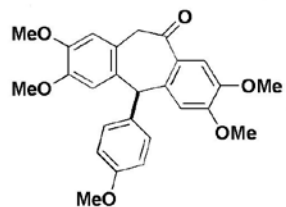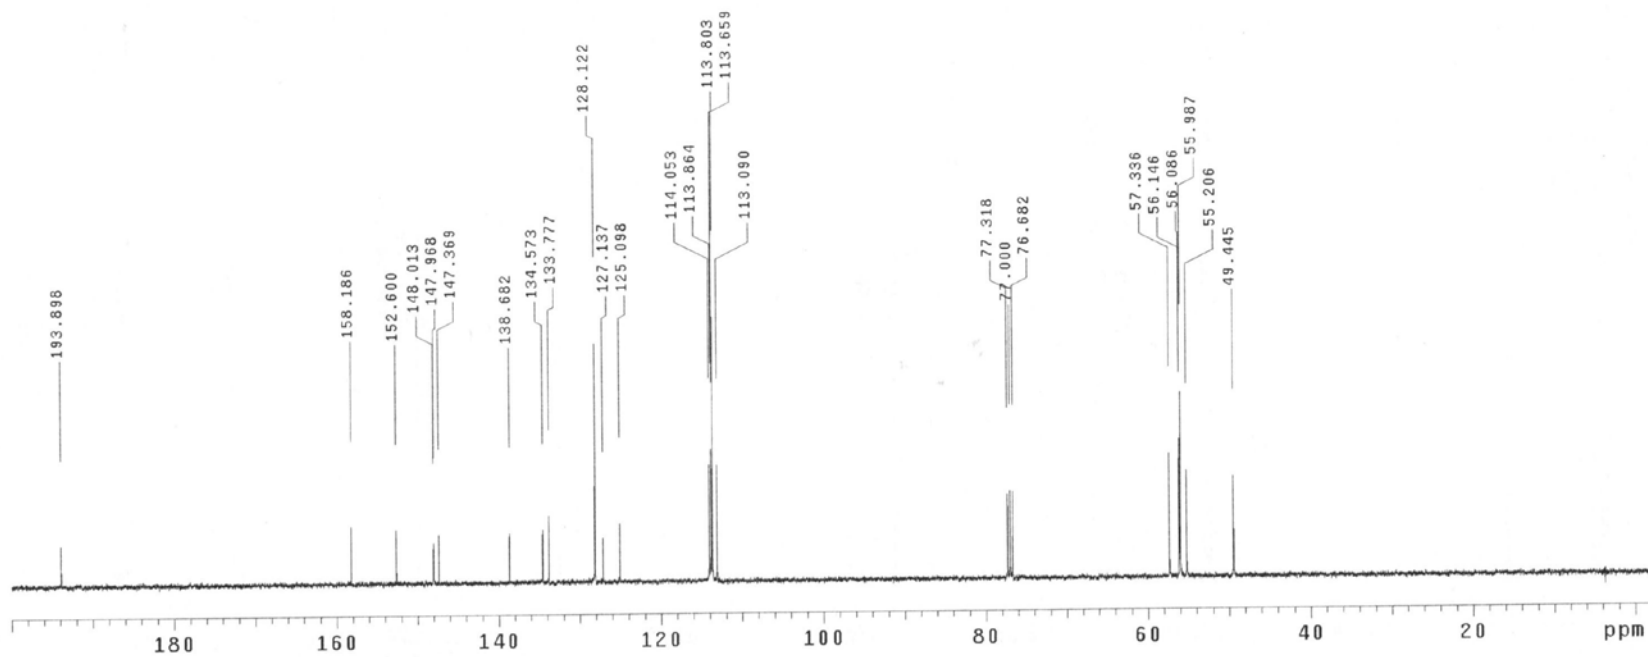

# Compound 5t-1 (<sup>1</sup>H-NMR spectral data)

SH[3.2.2]5t

Pulse Sequence: s2pu1  
UNITYplus-400 "unity400"  
Date: Jan 7 2019  
Solvent: CDCl<sub>3</sub>  
Ambient temperature  
Total 32 repetitions

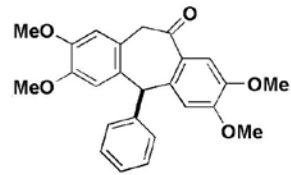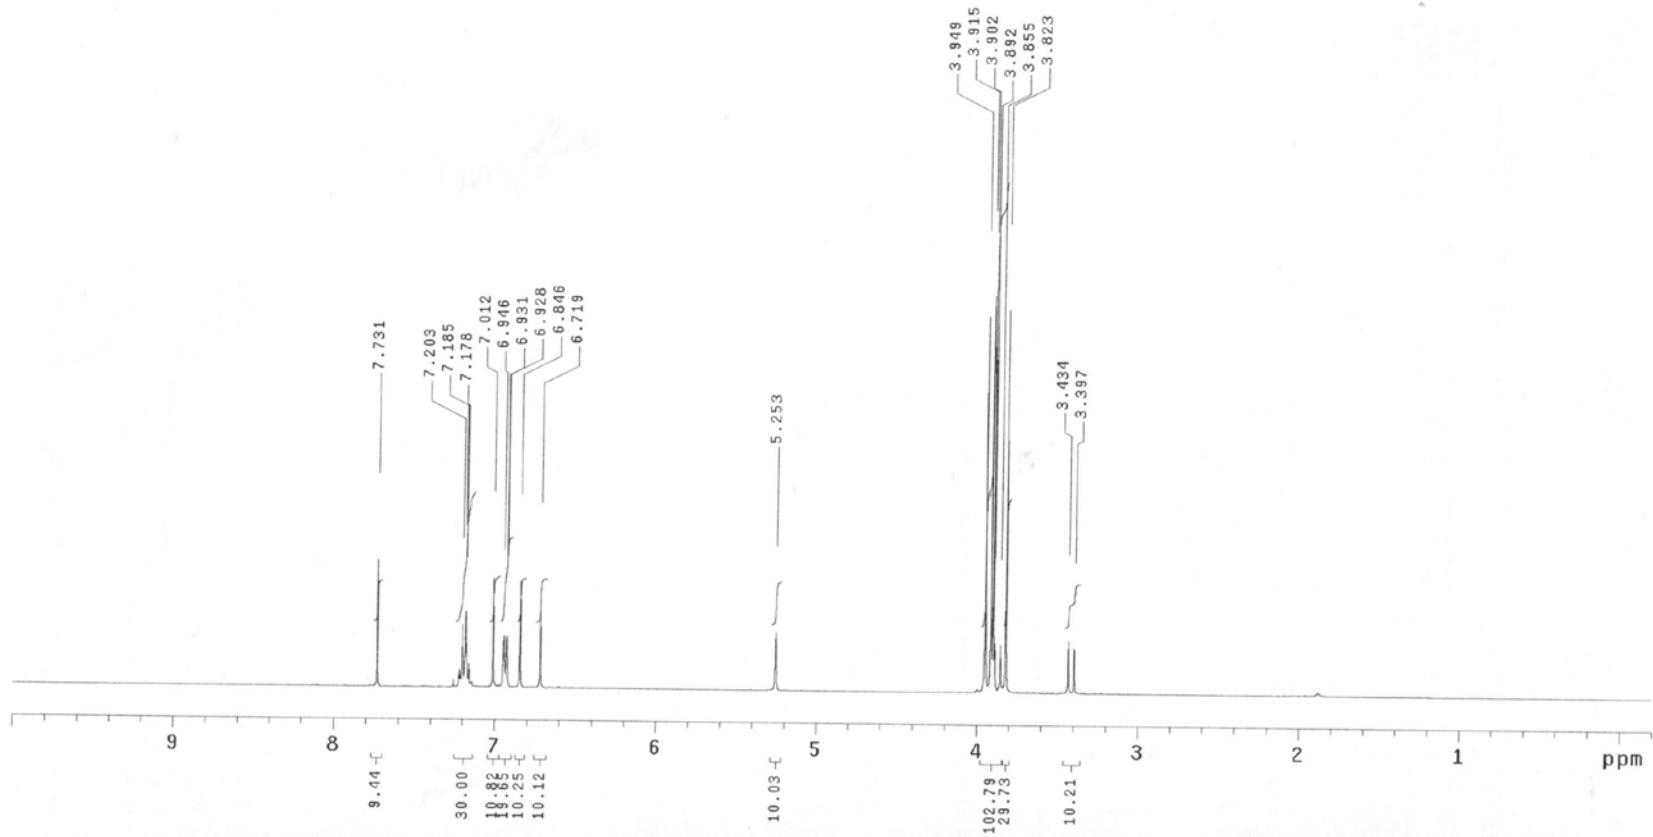

# Compound 5t-1 (<sup>13</sup>C-NMR spectral data)

SH[3.2.2]5t

Pulse Sequence: s2pu1

UNITYplus-400 "unity400"

Date: Jan 7 2019

Solvent: CDCl<sub>3</sub>

Ambient temperature

Total 240 repetitions

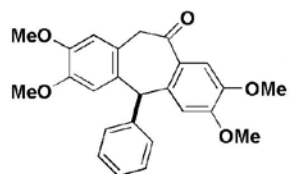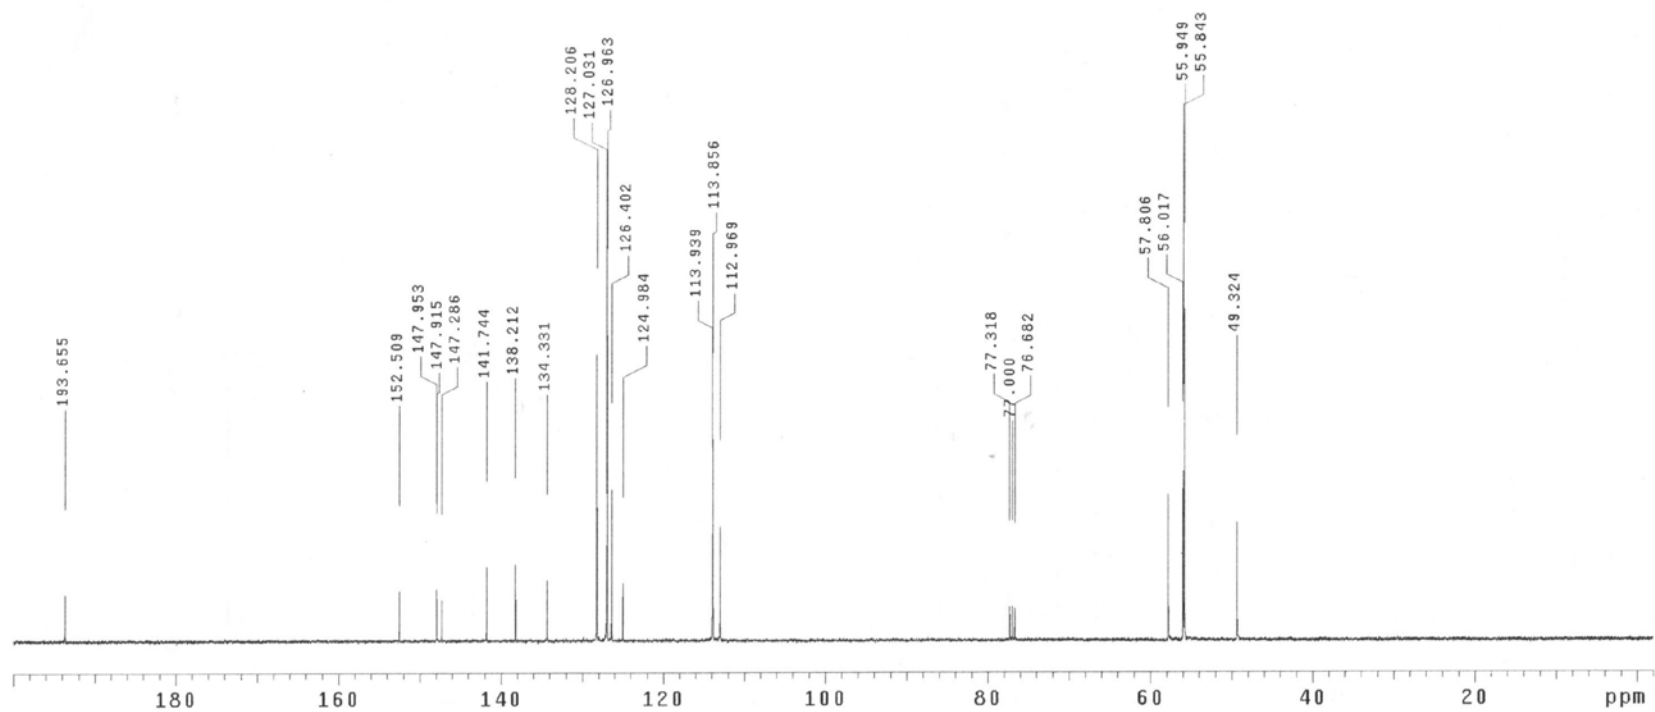

# Compound 5u-1 (<sup>1</sup>H-NMR spectral data)

SH[3.2.2]5u

Pulse Sequence: s2pu1

UNITYplus-400 "unity400"

Date: Jan 15 2019

Solvent: CDCl<sub>3</sub>

Ambient temperature

Total 32 repetitions

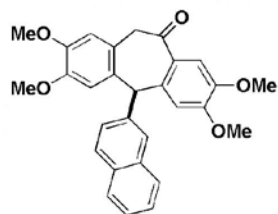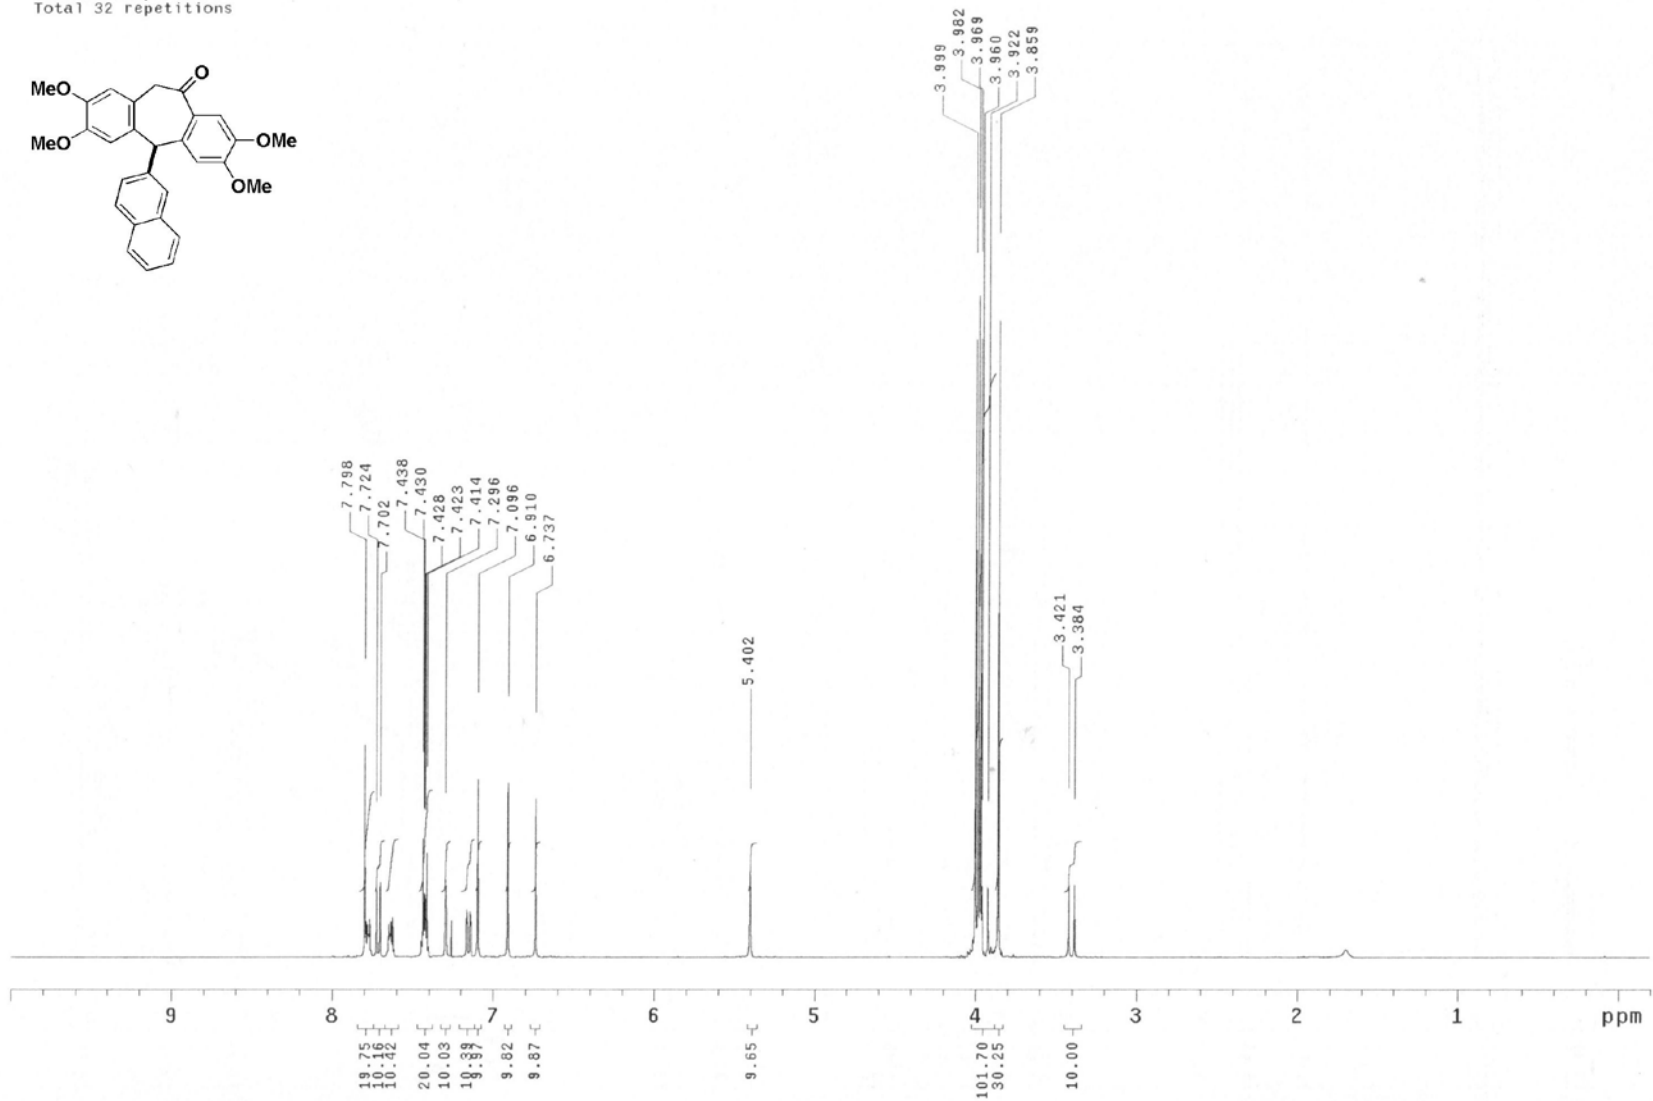

# Compound 5u-1 (<sup>13</sup>C-NMR spectral data)

SH[3.2.2]5u

Pulse Sequence: s2pu1  
UNITYplus-400 "unity400"  
Date: Jan 15 2019  
Solvent: CDCl<sub>3</sub>  
Ambient temperature  
Total 640 repetitions

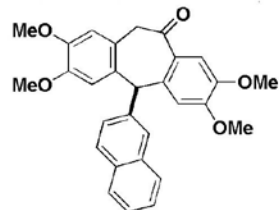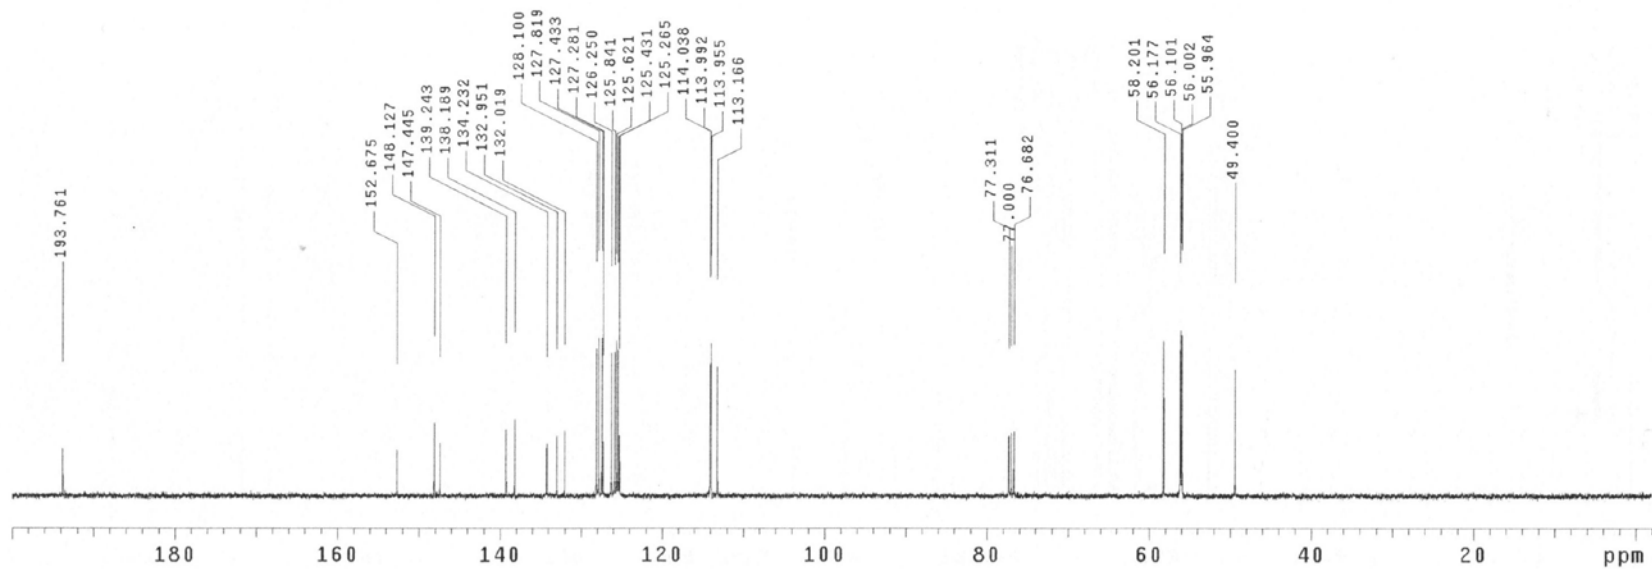

# Compound 5v-1 (<sup>1</sup>H-NMR spectral data)

SH[3.2.2]4v

Pulse Sequence: s2pu1

UNITYplus-400 "unity400"

Date: Jan 18 2019

Solvent: CDCl<sub>3</sub>

Ambient temperature

Total 32 repetitions

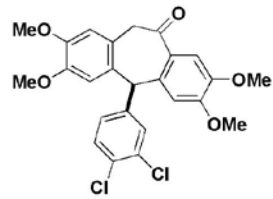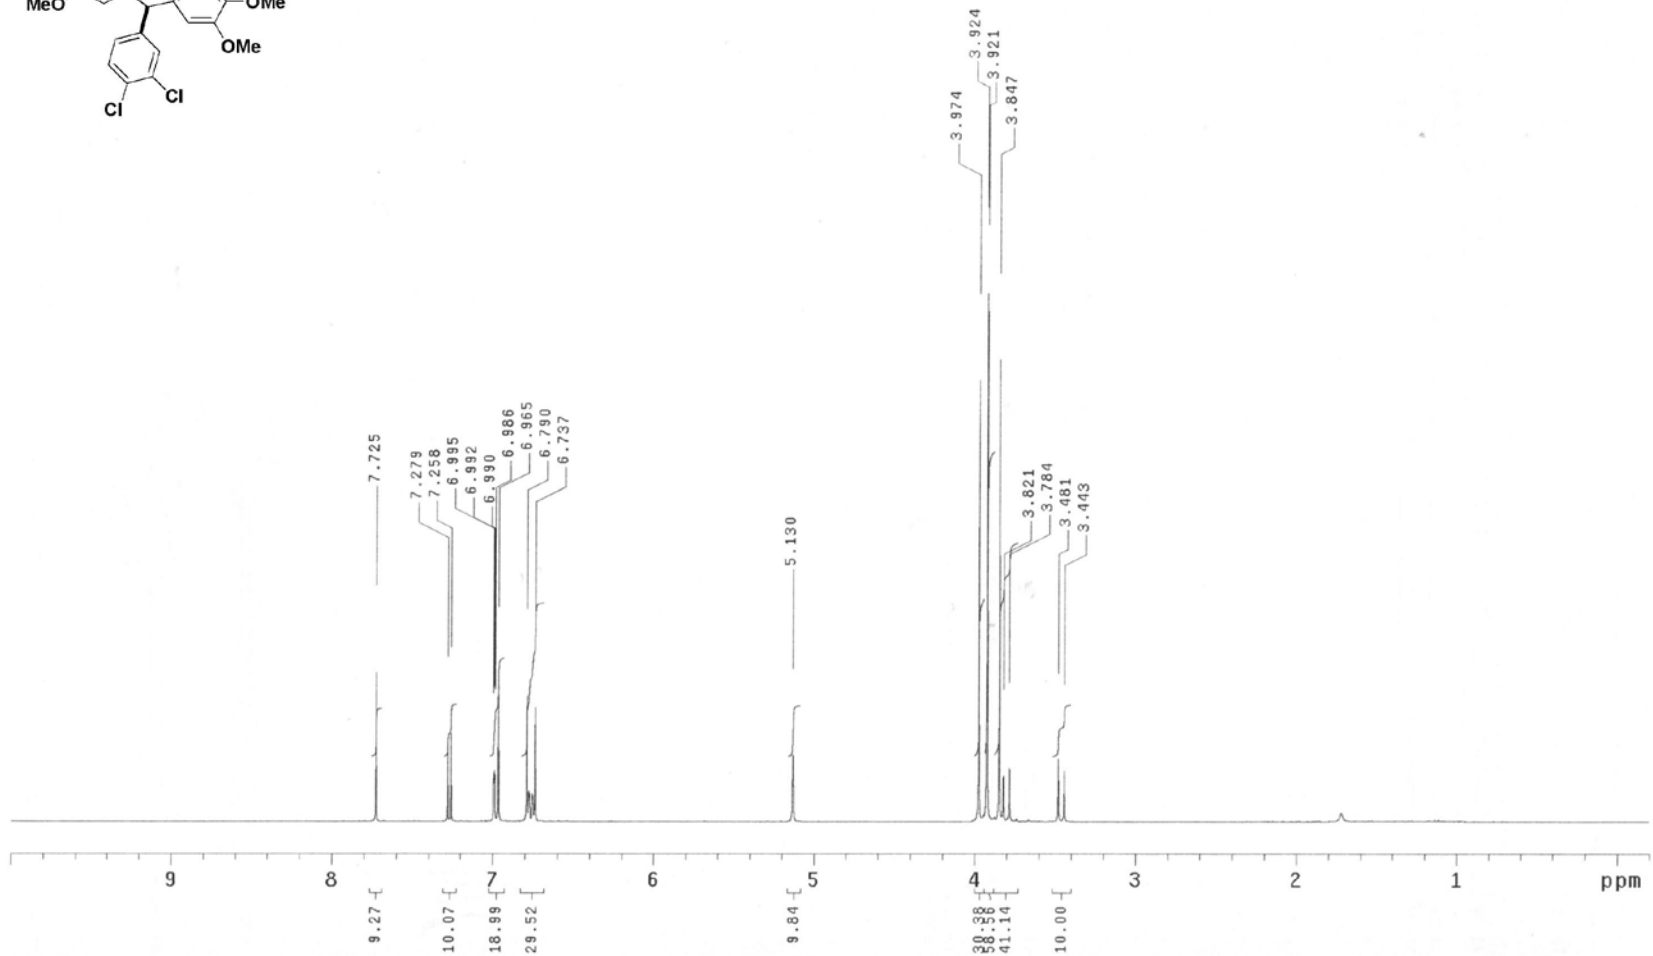



# Compound 5v-1 (<sup>13</sup>C-NMR spectral data)

SH[3.2.2]4v

Pulse Sequence: s2pu1

UNITYplus-400 "unity400"

Date: Jan 18 2019

Solvent: CDCl<sub>3</sub>

Ambient temperature

Total 1040 repetitions

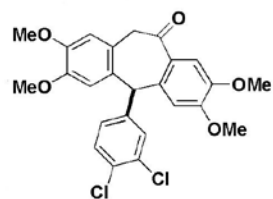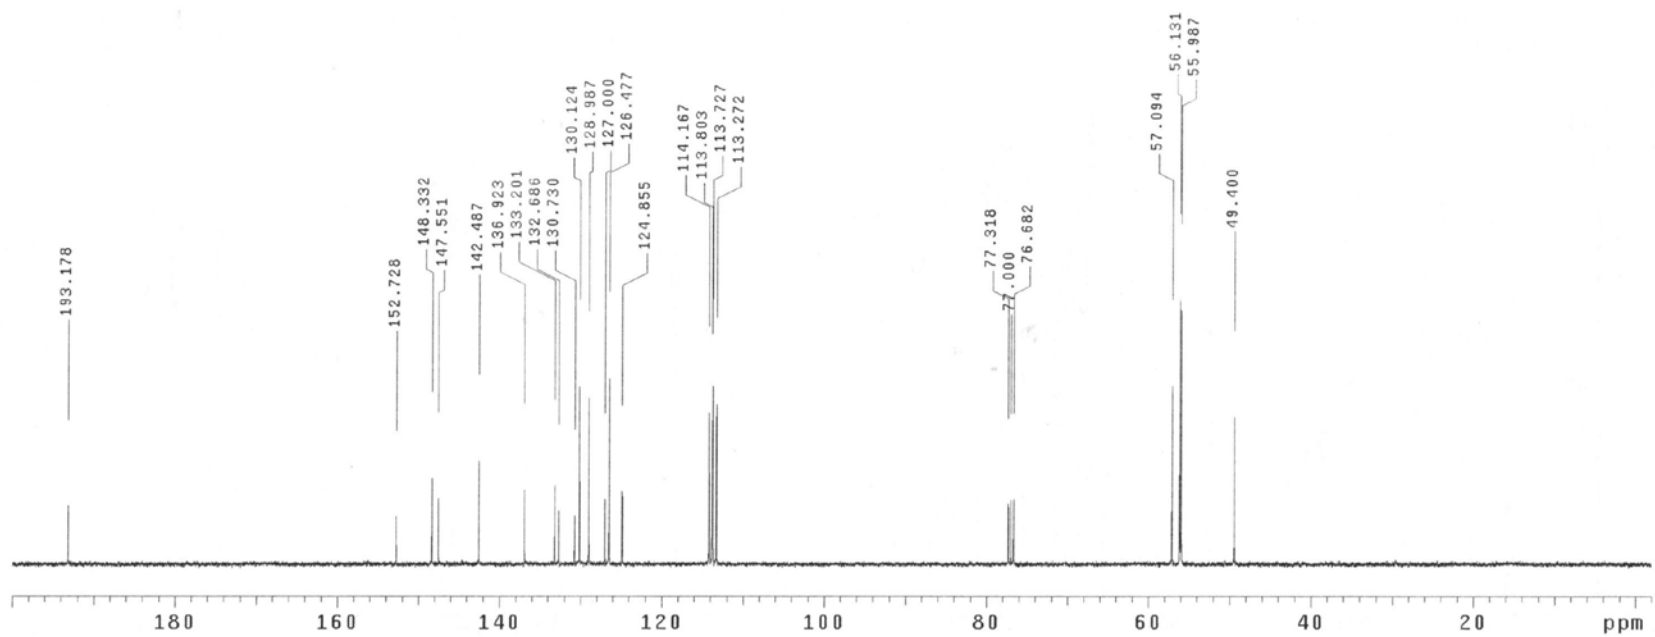

# Compound 5w-1 (<sup>1</sup>H-NMR spectral data)

SH[3.2.2]5w

Pulse Sequence: s2pu1

UNITYplus-400 "unity400"

Date: Jan 29 2019

Solvent: CDCl<sub>3</sub>

Ambient temperature

Total 32 repetitions

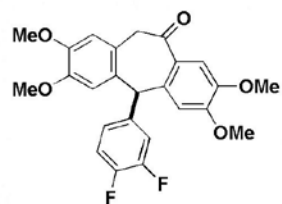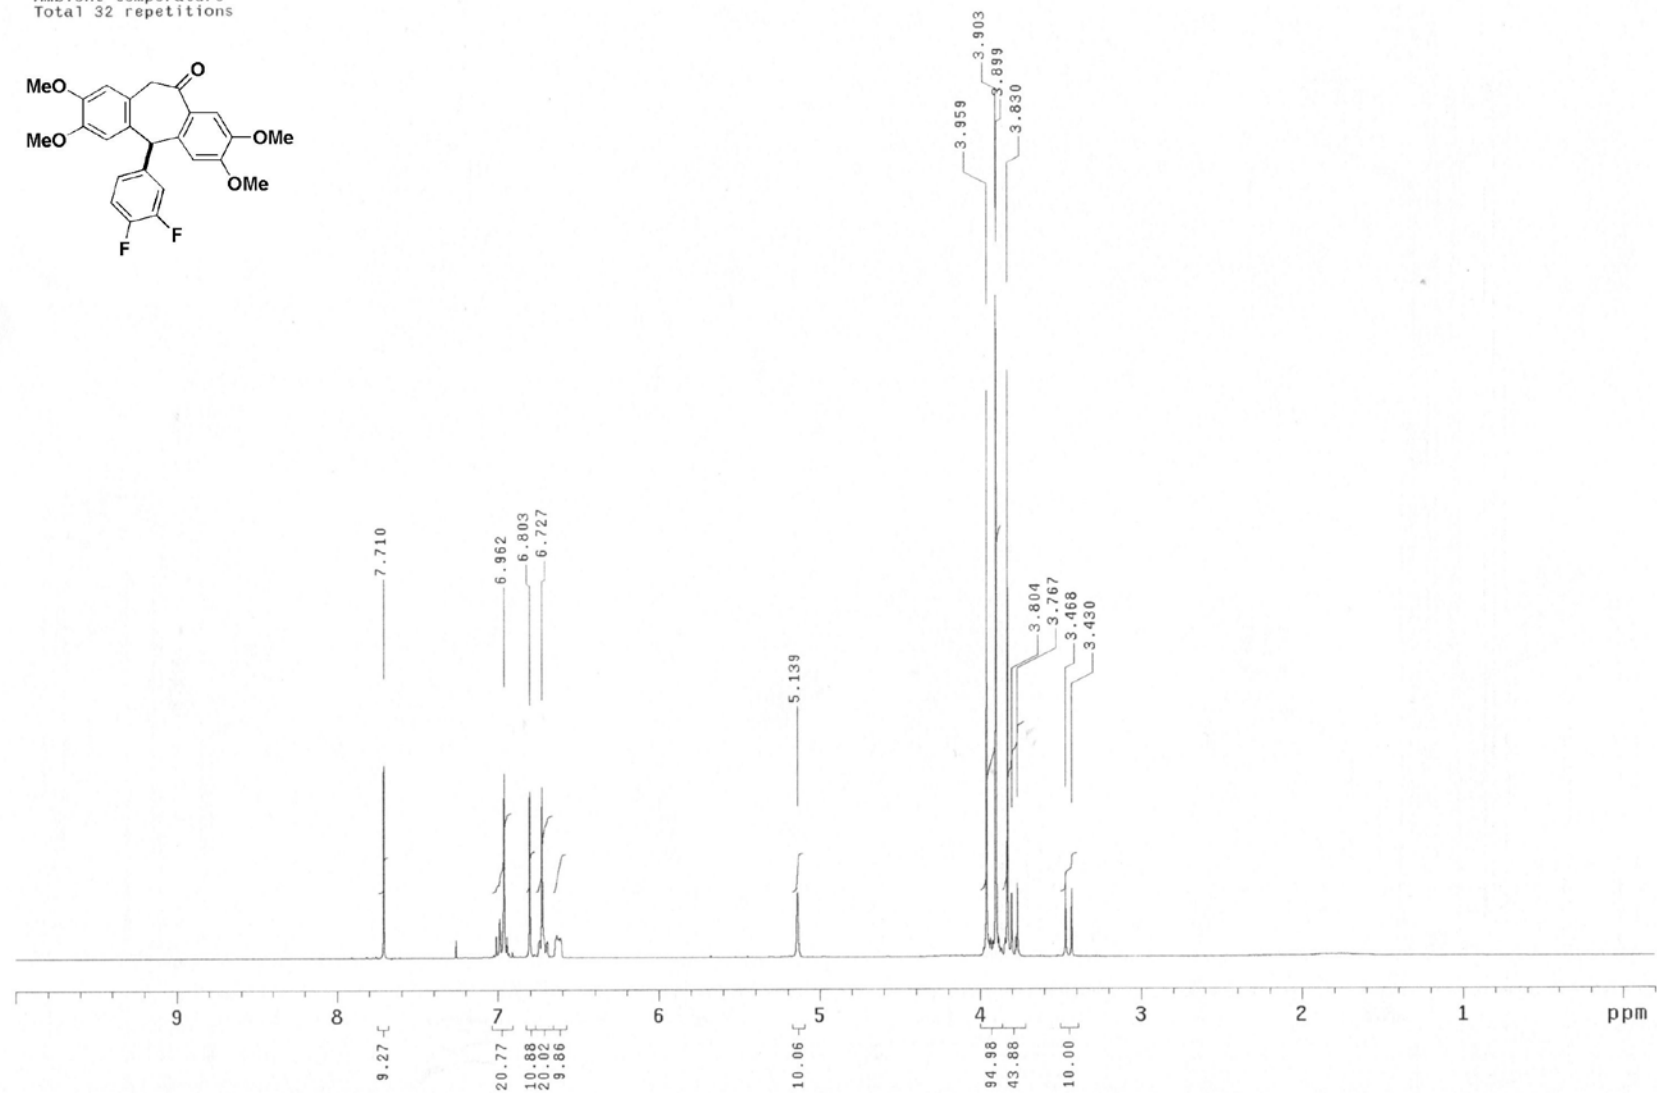

# Compound 5w-1 (<sup>13</sup>C-NMR spectral data)

SH[3.2.2]5w

Pulse Sequence: s2pu1

UNITYplus-400 "unity400"

Date: Jan 29 2019

Solvent: CDCl<sub>3</sub>

Ambient temperature

Total 1152 repetitions

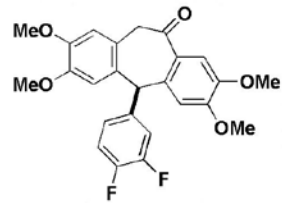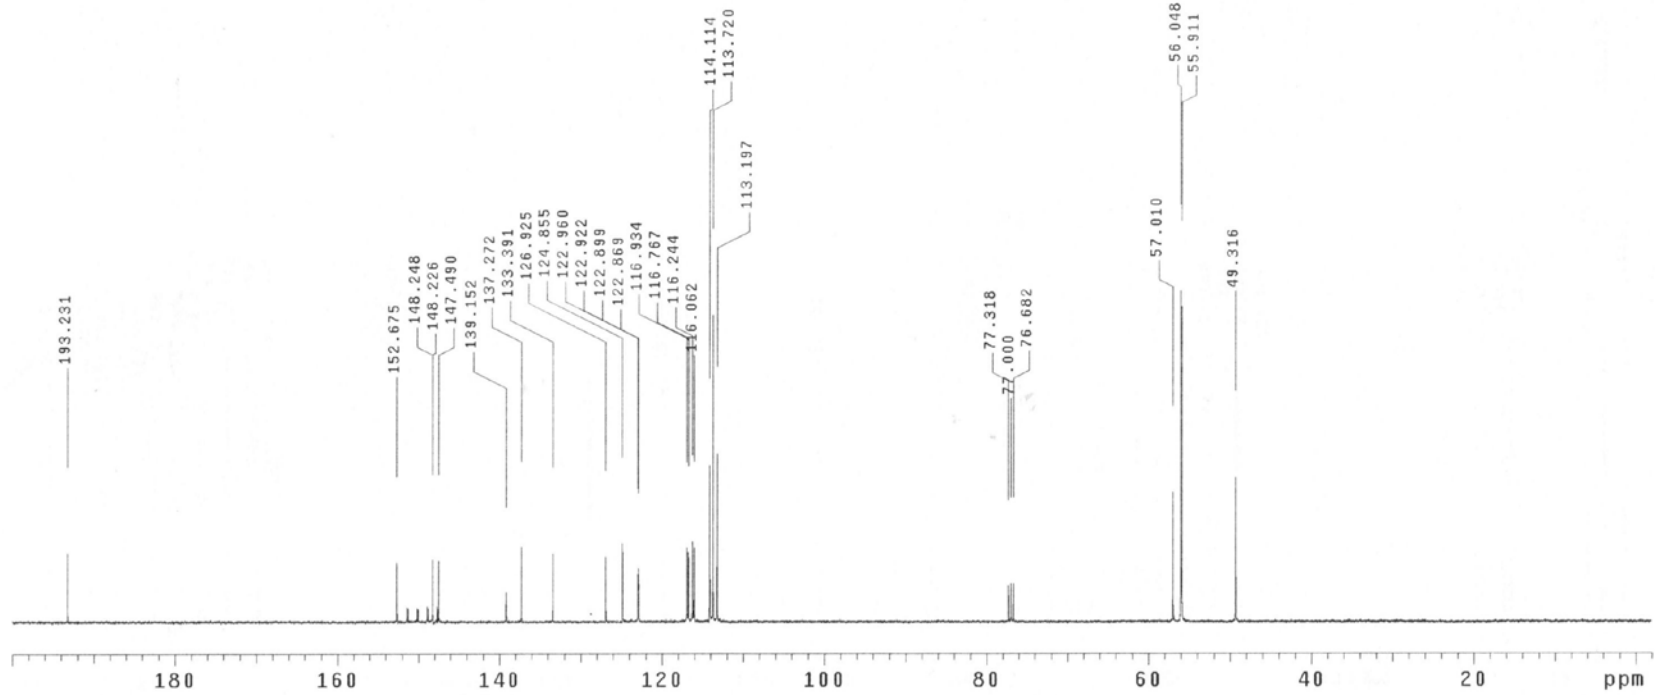

# Compound 5w-2 (<sup>1</sup>H-NMR spectral data)

SH5W-1

Pulse Sequence: s2pu1  
UNITYplus-400 "unity400"  
Date: Jan 18 2019  
Solvent: CDCl3  
Ambient temperature  
Total 32 repetitions

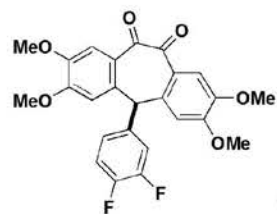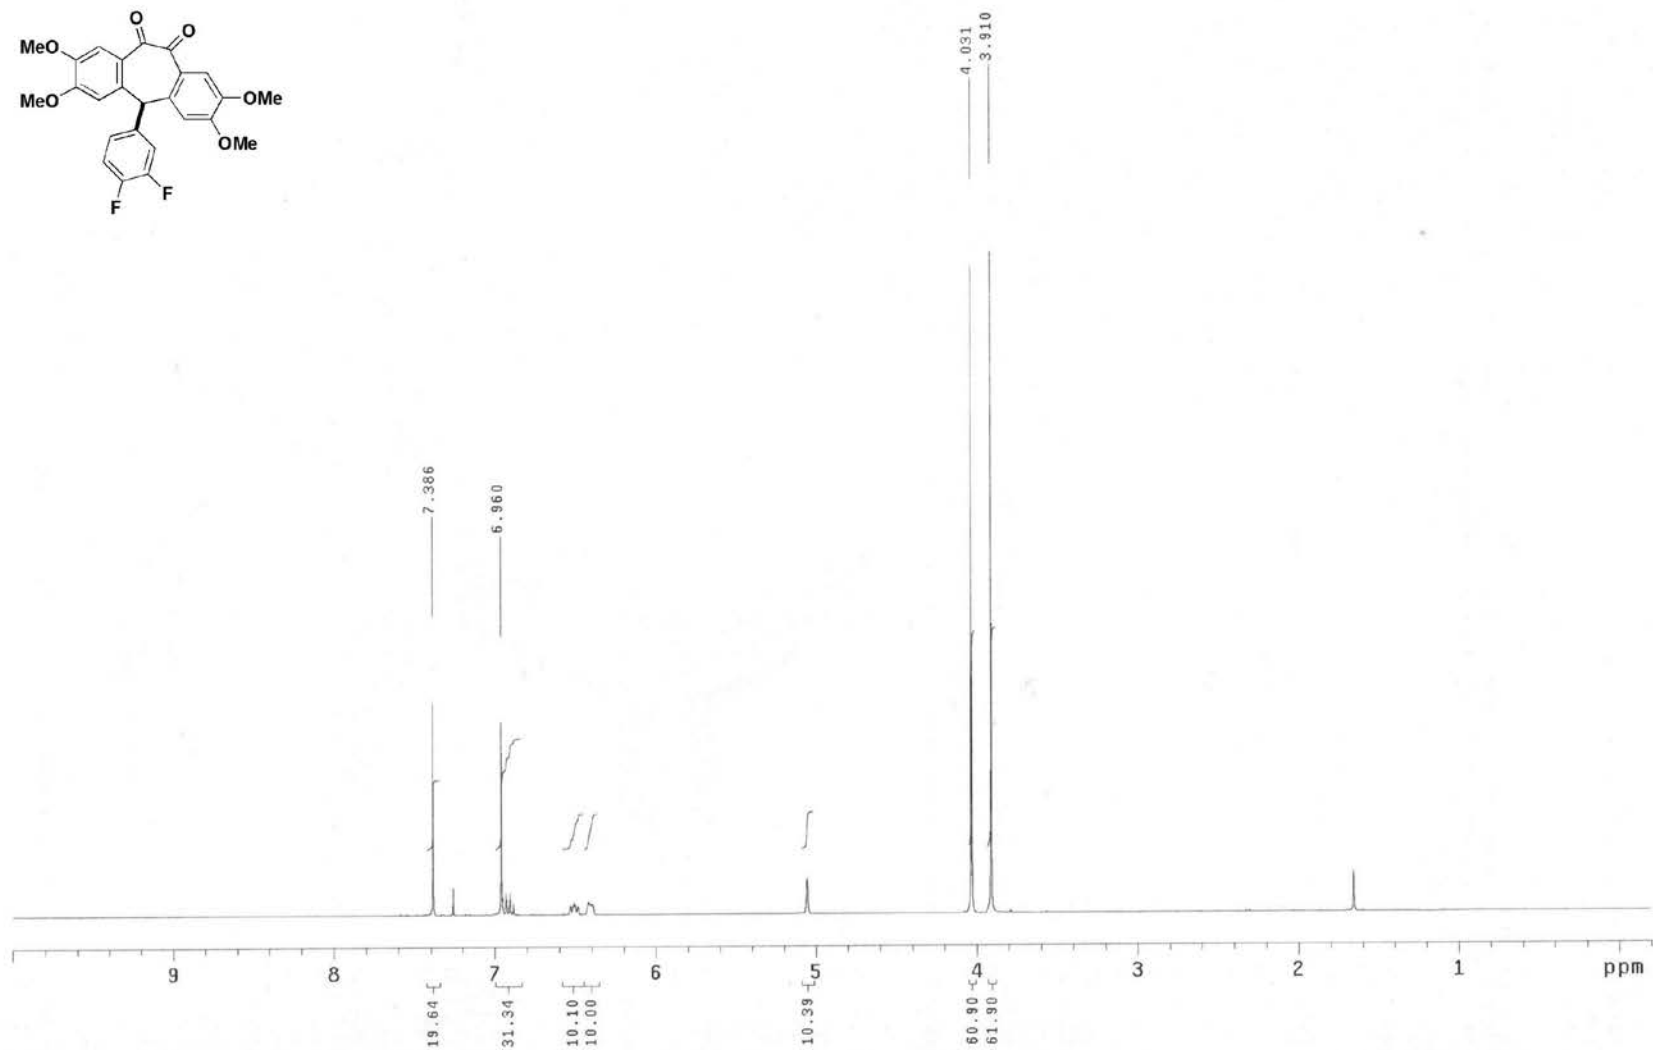

# Compound 5w-2 (<sup>13</sup>C-NMR spectral data)

SH5W-1

Pulse Sequence: s2pu1  
UNITYplus-400 "unity400"  
Date: Jan 18 2019  
Solvent: CDCl<sub>3</sub>  
Ambient temperature  
Total 1616 repetitions

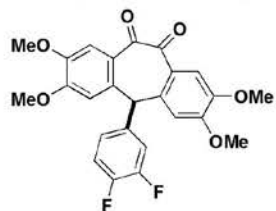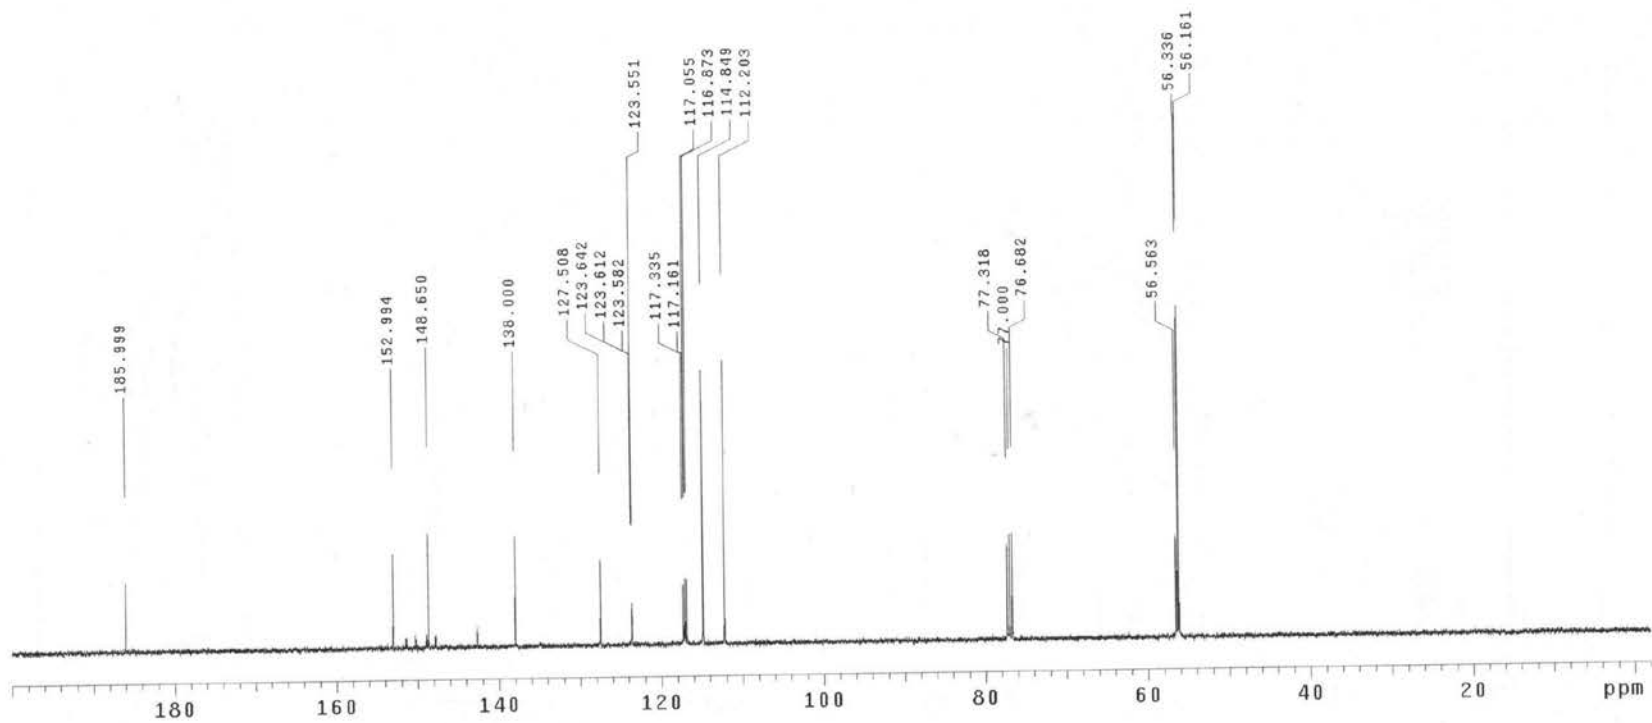

# Compound 5x (<sup>1</sup>H-NMR spectral data)

SH[3.2.2]5bb

Pulse Sequence: s2pu1

UNITYplus-400 "unity400"

Date: Apr 11 2019

Solvent: CDCl<sub>3</sub>

Ambient temperature

Total 32 repetitions

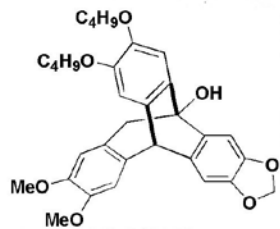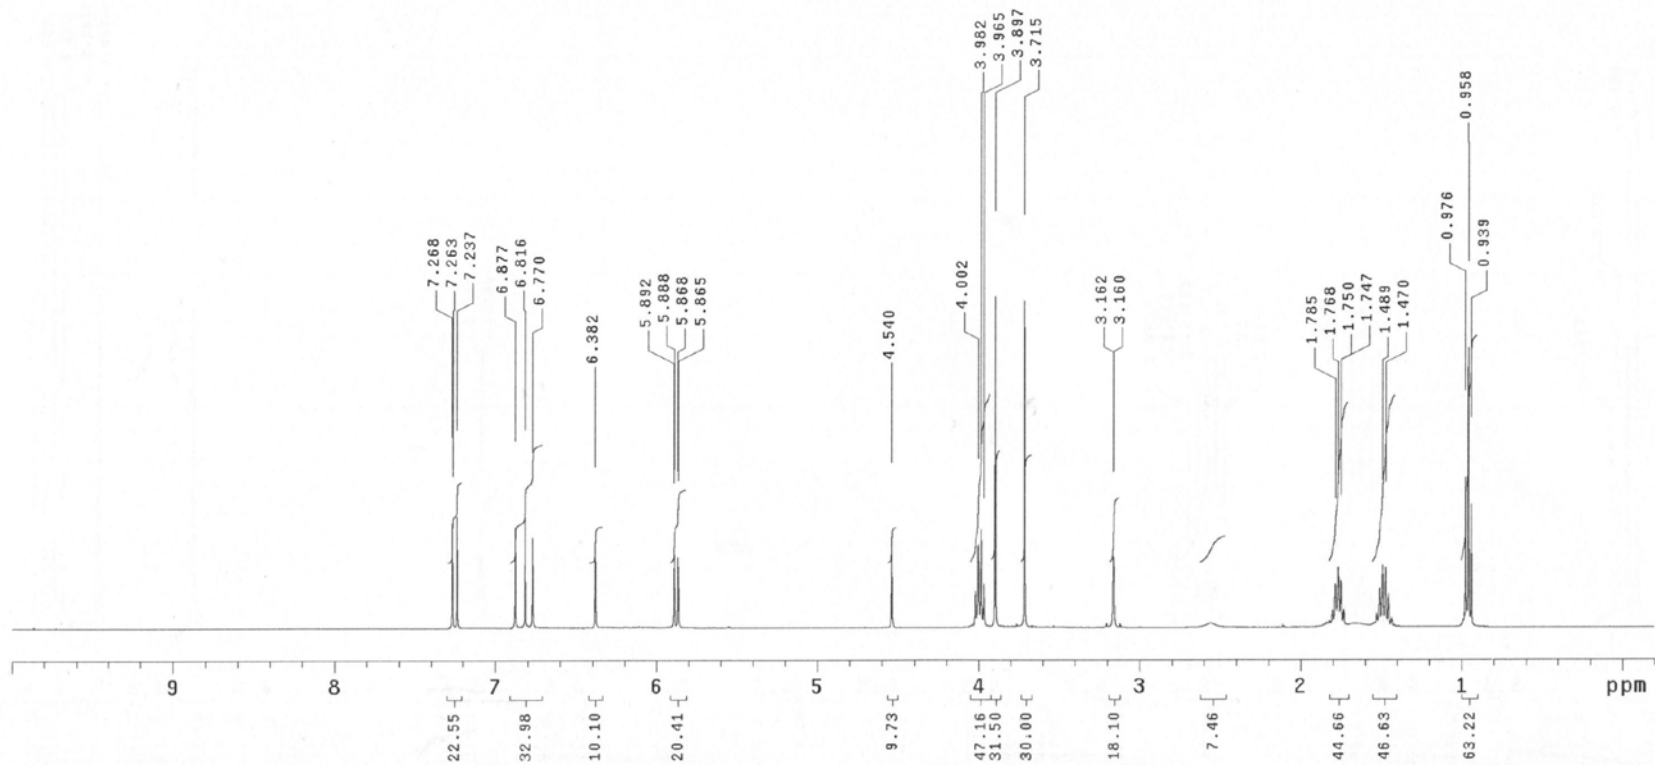

# Compound 5x (<sup>13</sup>C-NMR spectral data)

SH[3.2.2]5bb

Pulse Sequence: s2pu1

UNITYplus-400 "unity400"

Date: Apr 11 2019

Solvent: CDCl<sub>3</sub>

Ambient temperature

Total 1824 repetitions

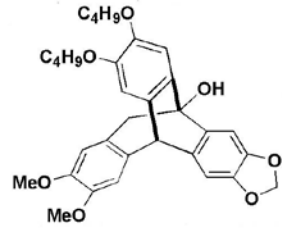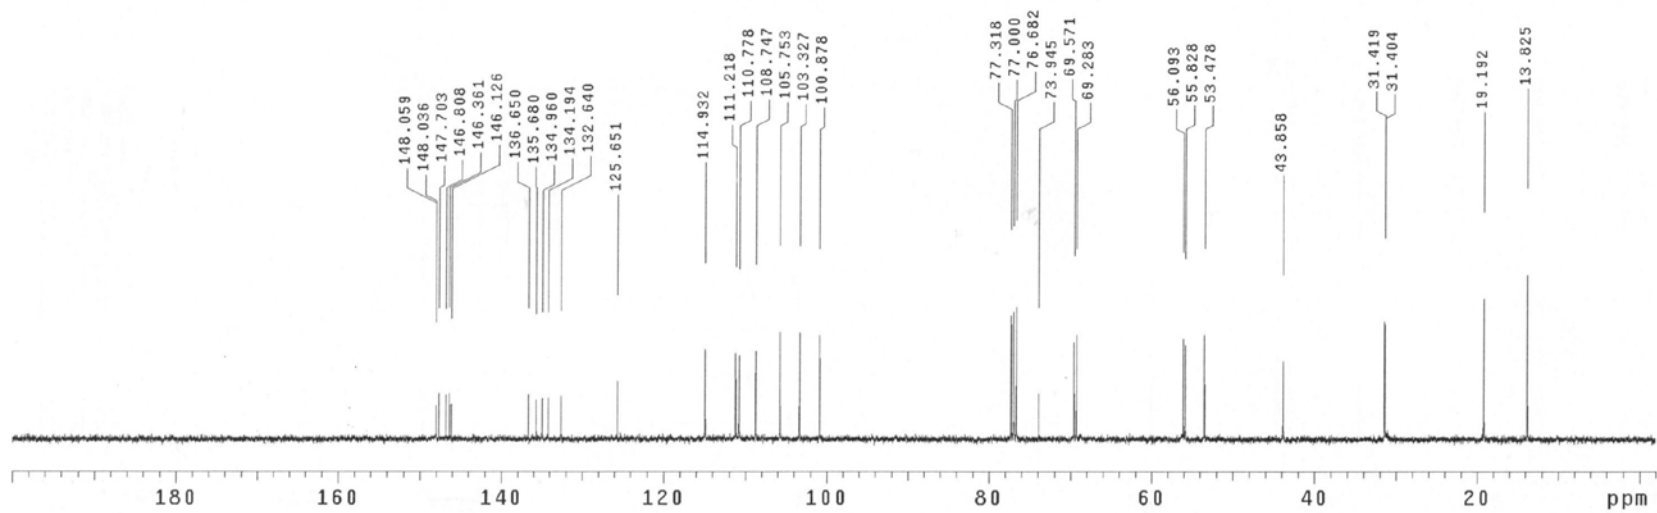

# Compound 5y (<sup>1</sup>H-NMR spectral data)

SH[322]5aa

Pulse Sequence: s2pu1

UNITYplus-400 "unity400"

Date: Apr 16 2019

Solvent: CDCl<sub>3</sub>

Ambient temperature

Total 32 repetitions

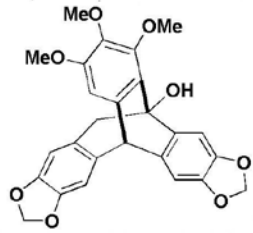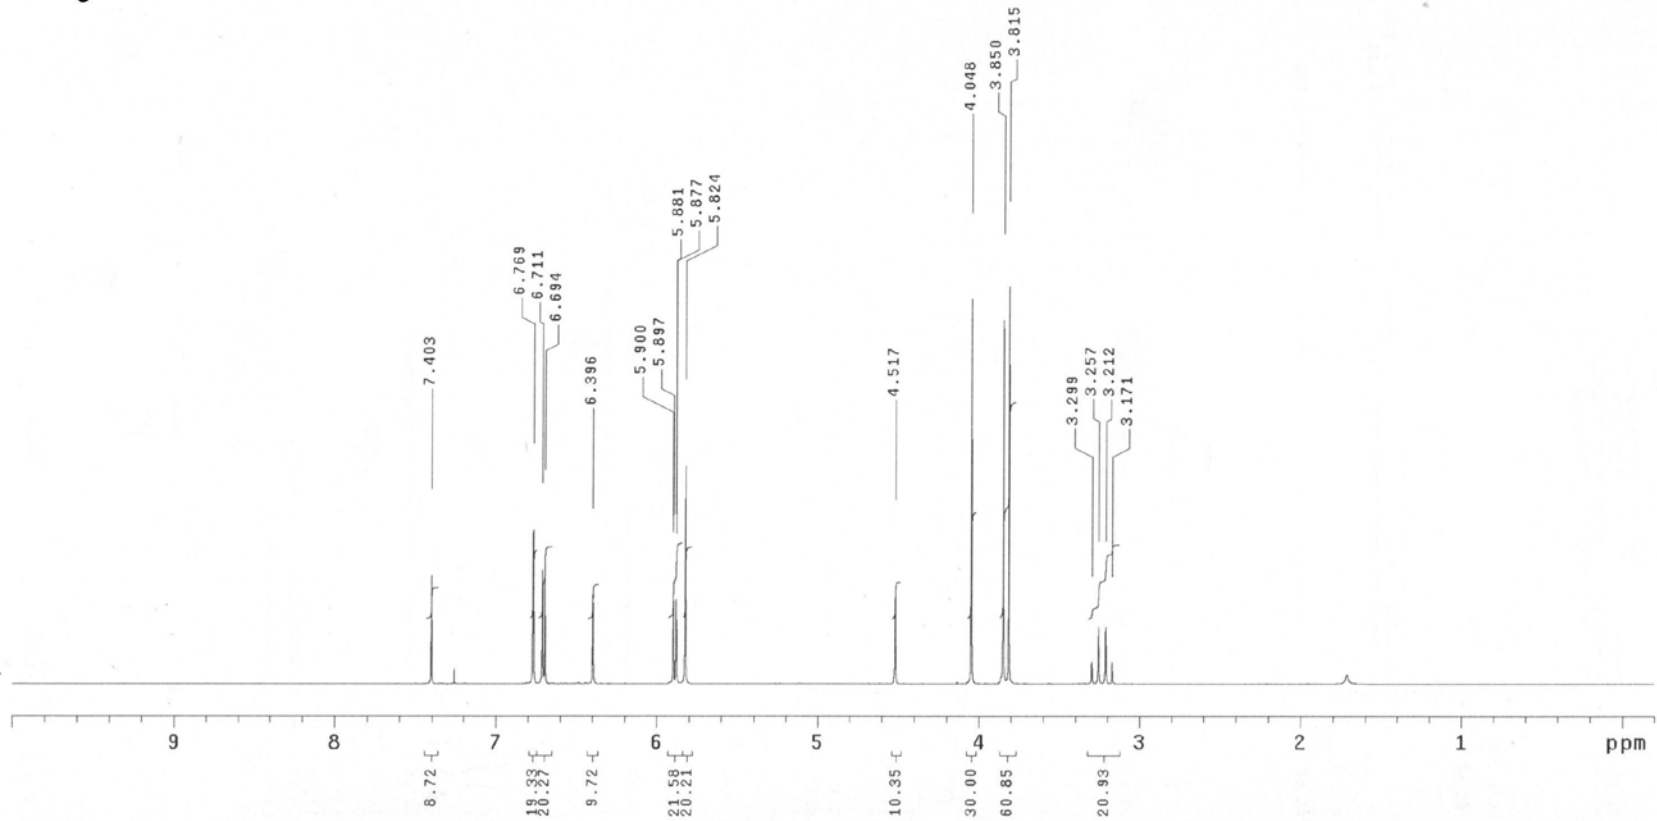



# Compound 5y (<sup>13</sup>C-NMR spectral data)

SH[322]5aa

Pulse Sequence: s2pu1

UNITYplus-400 "unity400"

Date: Apr 16 2019

Solvent: CDCl<sub>3</sub>

Ambient temperature

Total 464 repetitions

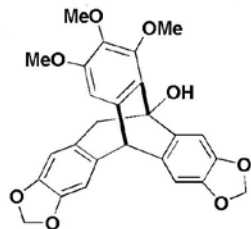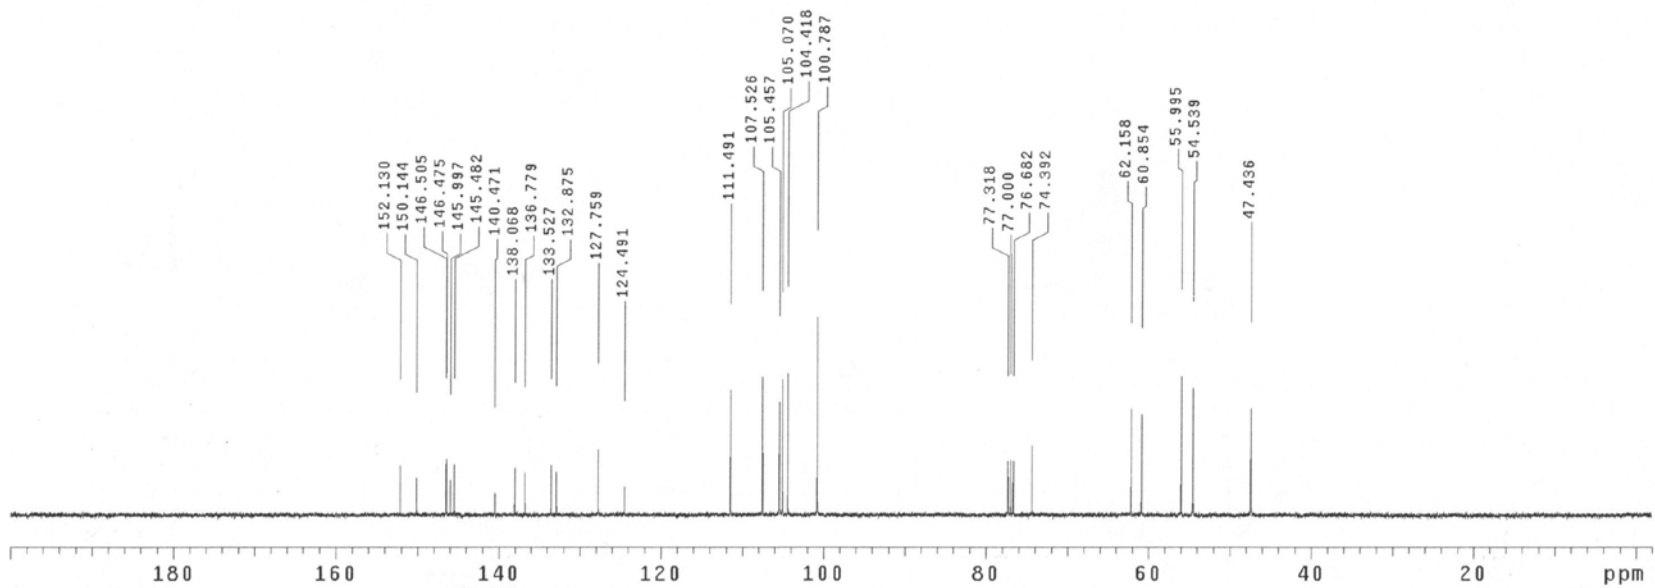

# Compound 5z (<sup>1</sup>H-NMR spectral data)

SH[3.2.2]5Z

Pulse Sequence: s2pu1  
 UNITYplus-400 "unity400"  
 Date: Feb 12 2019  
 Solvent: CDCl3  
 Ambient temperature  
 Total 32 repetitions

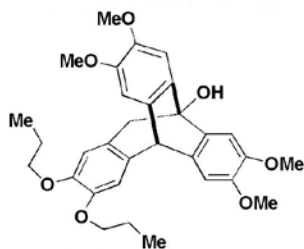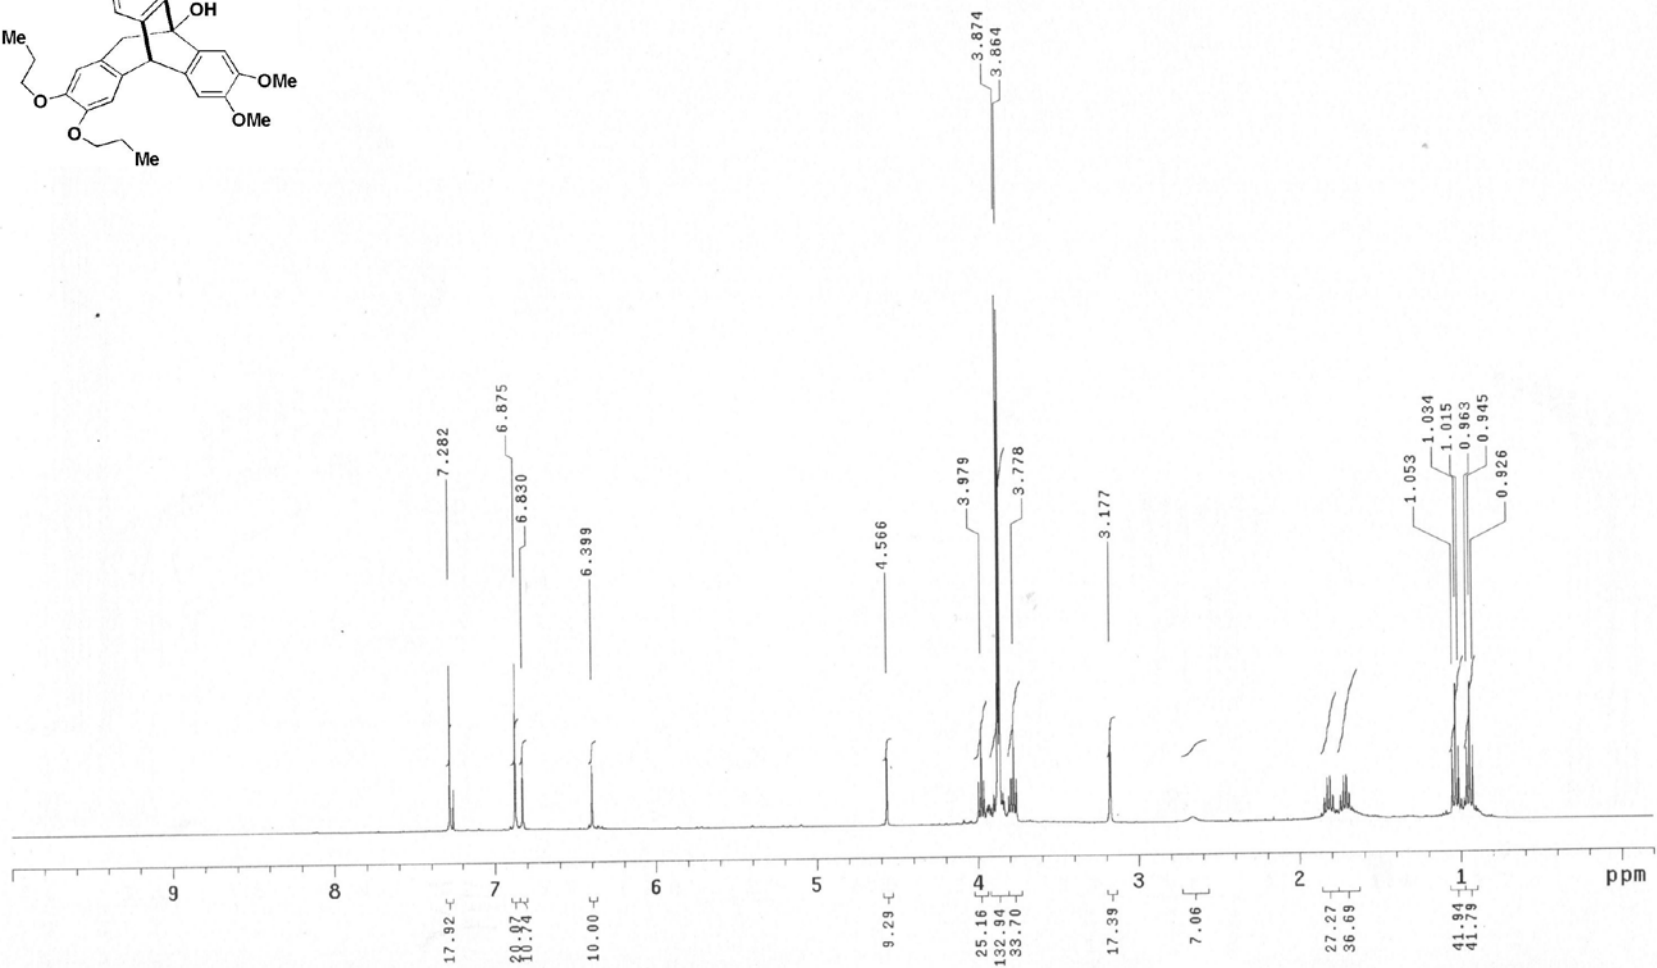

# Compound 5z (<sup>13</sup>C-NMR spectral data)

SH[3.2.2]5Z

Pulse Sequence: s2pu1  
UNITYplus-400 "unity400"  
Date: Feb 12 2019  
Solvent: CDCl<sub>3</sub>  
Ambient temperature  
Total 2080 repetitions

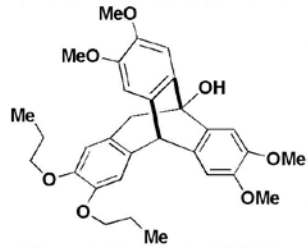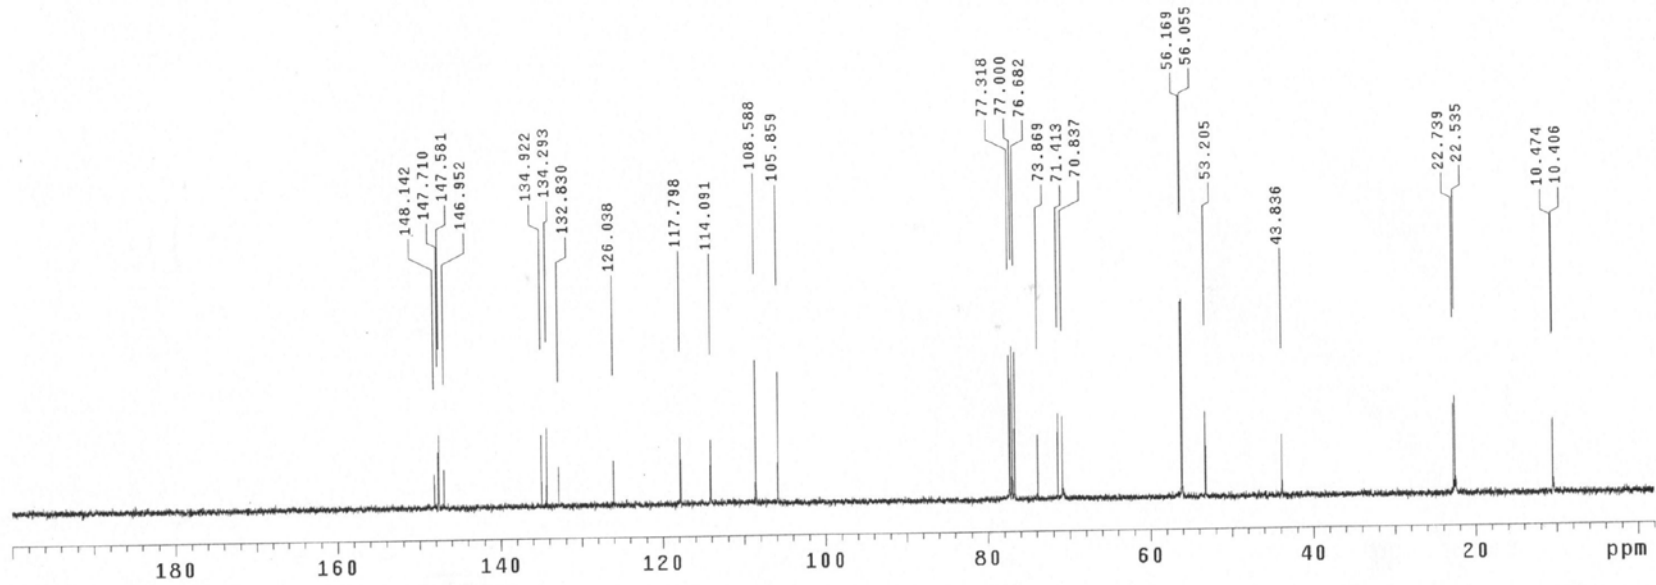

## X-ray crystal data of compound 5a (CCDC 1938168)

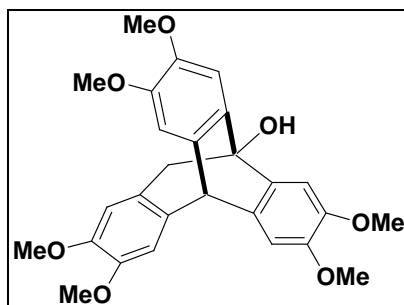

**Sample preparation** : A solution of compound **5a** (30 mg) in  $\text{CH}_2\text{Cl}_2$  (10 mL) was placed in a tube (10 mL). EtOAc (2 mL) was added slowly to the vial with a dropper. The vial was closed with little cotton and kept at room temperature for 2 days. Then, colorless prisms were observed.

**Crystal measurement** : X-ray crystal structures were determined with a Bruker Enraf-Nonius single-crystal diffractometer (CAD4, Kappa CCD). Thermal ellipsoids are drawn at 50% probability level.

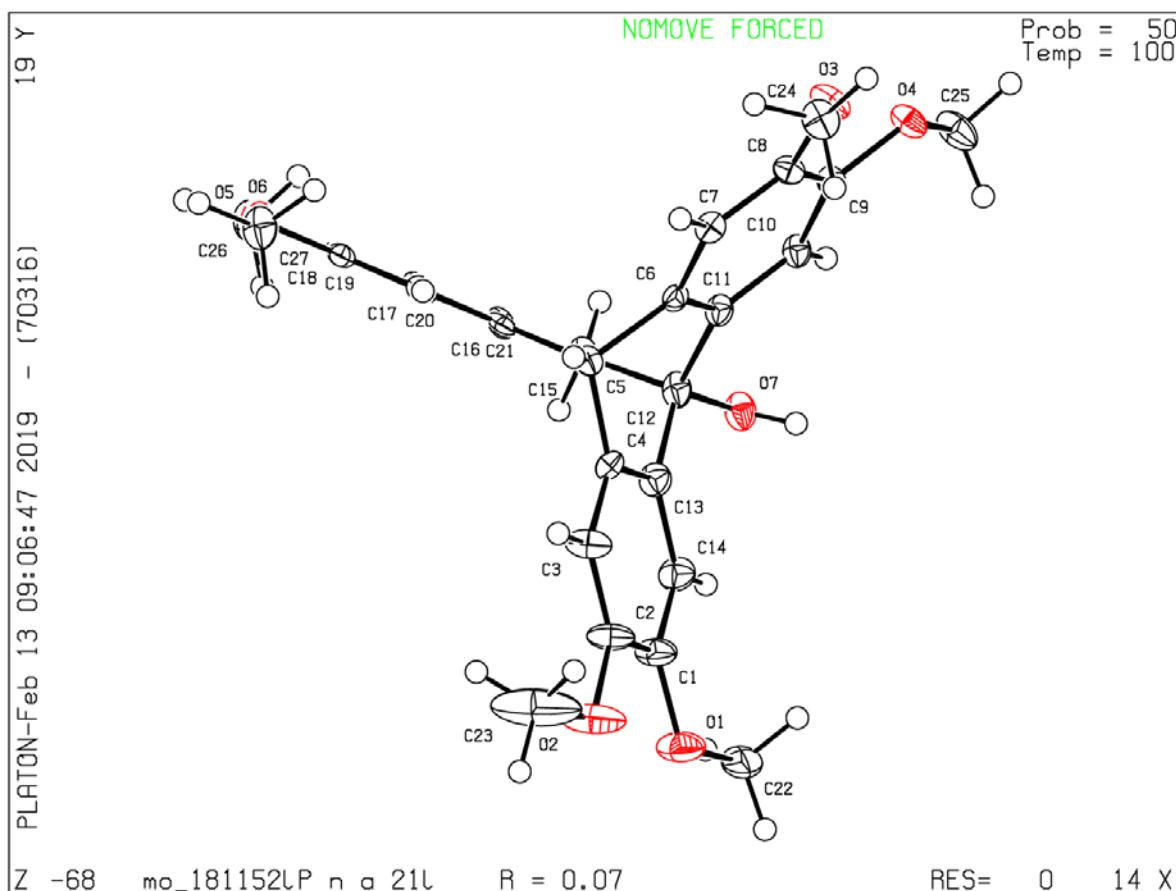

|                                   |                                                                                                    |
|-----------------------------------|----------------------------------------------------------------------------------------------------|
| Empirical formula                 | C <sub>27</sub> H <sub>28</sub> O <sub>7</sub>                                                     |
| Formula weight                    | 464.49                                                                                             |
| Temperature                       | 100(2) K                                                                                           |
| Wavelength                        | 0.71073 Å                                                                                          |
| Crystal system                    | Orthorhombic                                                                                       |
| Space group                       | P n a 21                                                                                           |
| Unit cell dimensions              | a = 15.2055(18) Å      α = 90°.<br>b = 17.986(2) Å      β = 90°.<br>c = 8.4082(11) Å      γ = 90°. |
| Volume                            | 2299.5(5) Å <sup>3</sup>                                                                           |
| Z                                 | 4                                                                                                  |
| Density (calculated)              | 1.342 Mg/m <sup>3</sup>                                                                            |
| Absorption coefficient            | 0.097 mm <sup>-1</sup>                                                                             |
| F(000)                            | 984                                                                                                |
| Crystal size                      | 0.10 x 0.08 x 0.02 mm <sup>3</sup>                                                                 |
| Theta range for data collection   | 1.754 to 26.510°.                                                                                  |
| Index ranges                      | -19<=h<=18, -22<=k<=21, -10<=l<=10                                                                 |
| Reflections collected             | 24767                                                                                              |
| Independent reflections           | 4680 [R(int) = 0.0980]                                                                             |
| Completeness to theta = 25.242°   | 100.0 %                                                                                            |
| Absorption correction             | Semi-empirical from equivalents                                                                    |
| Max. and min. transmission        | 0.7454 and 0.6687                                                                                  |
| Refinement method                 | Full-matrix least-squares on F <sup>2</sup>                                                        |
| Data / restraints / parameters    | 4680 / 1 / 315                                                                                     |
| Goodness-of-fit on F <sup>2</sup> | 1.053                                                                                              |
| Final R indices [I>2sigma(I)]     | R1 = 0.0690, wR2 = 0.1332                                                                          |
| R indices (all data)              | R1 = 0.1004, wR2 = 0.1476                                                                          |
| Absolute structure parameter      | -2(2)                                                                                              |
| Extinction coefficient            | n/a                                                                                                |
| Largest diff. peak and hole       | 0.401 and -0.249 e.Å <sup>-3</sup>                                                                 |

## X-ray crystal data of compound 5w-2 (CCDC 1938169)

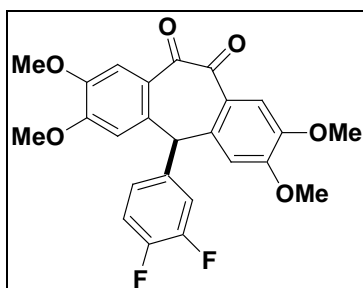

**Sample preparation** : A solution of compound **5w-2** (30 mg) in CH<sub>2</sub>Cl<sub>2</sub> (10 mL) was placed in a tube (10 mL). EtOAc (2 mL) was added slowly to the vial with a dropper. The vial was closed with little cotton and kept at room temperature for 2 days. Then, colorless prisms were observed.

**Crystal measurement** : X-ray crystal structures were determined with a Bruker Enraf-Nonius single-crystal diffractometer (CAD4, Kappa CCD). Thermal ellipsoids are drawn at 50% probability level.

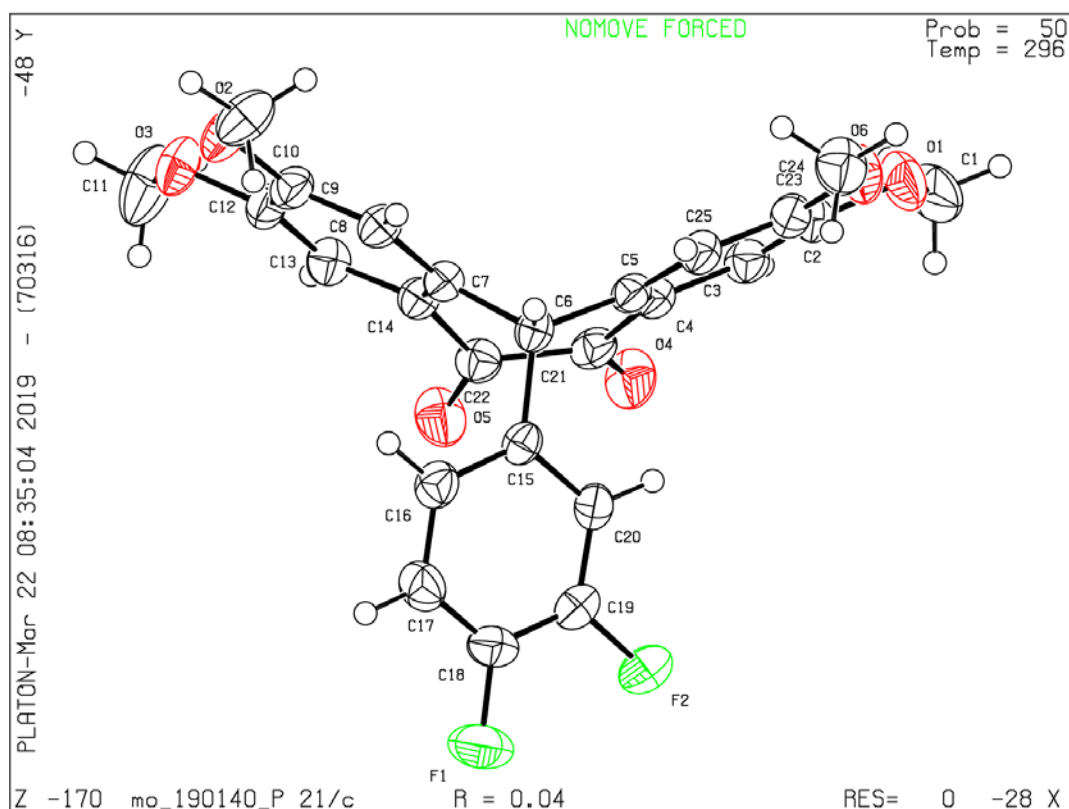

|                                   |                                                                                                            |
|-----------------------------------|------------------------------------------------------------------------------------------------------------|
| Empirical formula                 | C <sub>25</sub> H <sub>20</sub> F <sub>2</sub> O <sub>6</sub>                                              |
| Formula weight                    | 454.41                                                                                                     |
| Temperature                       | 296(2) K                                                                                                   |
| Wavelength                        | 0.71073 Å                                                                                                  |
| Crystal system                    | Monoclinic                                                                                                 |
| Space group                       | P2 <sub>1</sub> /c                                                                                         |
| Unit cell dimensions              | a = 11.9481(8) Å      α = 90°.<br>b = 15.6973(9) Å      β = 111.052(3)°.<br>c = 12.0408(7) Å      γ = 90°. |
| Volume                            | 2107.6(2) Å <sup>3</sup>                                                                                   |
| Z                                 | 4                                                                                                          |
| Density (calculated)              | 1.432 Mg/m <sup>3</sup>                                                                                    |
| Absorption coefficient            | 0.113 mm <sup>-1</sup>                                                                                     |
| F(000)                            | 944                                                                                                        |
| Crystal size                      | 0.17 x 0.14 x 0.06 mm <sup>3</sup>                                                                         |
| Theta range for data collection   | 1.826 to 26.446°.                                                                                          |
| Index ranges                      | -13 ≤ h ≤ 14, -19 ≤ k ≤ 19, -15 ≤ l ≤ 12                                                                   |
| Reflections collected             | 29528                                                                                                      |
| Independent reflections           | 4328 [R(int) = 0.0422]                                                                                     |
| Completeness to theta = 25.242°   | 100.0 %                                                                                                    |
| Absorption correction             | Semi-empirical from equivalents                                                                            |
| Max. and min. transmission        | 0.7454 and 0.6846                                                                                          |
| Refinement method                 | Full-matrix least-squares on F <sup>2</sup>                                                                |
| Data / restraints / parameters    | 4328 / 0 / 302                                                                                             |
| Goodness-of-fit on F <sup>2</sup> | 1.004                                                                                                      |
| Final R indices [I > 2σ(I)]       | R1 = 0.0407, wR2 = 0.0917                                                                                  |
| R indices (all data)              | R1 = 0.0725, wR2 = 0.1061                                                                                  |
| Extinction coefficient            | n/a                                                                                                        |
| Largest diff. peak and hole       | 0.150 and -0.160 e.Å <sup>-3</sup>                                                                         |
